# Supplementary material for: Spatiotemporal Heterogeneity of Chlorophyll Content and Fluorescence Response Within Rice (Oryza sativa L.) Canopies Under Different Nitrogen Treatments
Source: Front Plant Sci. 2021 Mar 25;12:645977. doi: 10.3389/fpls.2021.645977 (PMC8028447; doi:10.3389/fpls.2021.645977)
Supplement: Supplementary file 5 [file Table_2.XLSX]

## Sheet: Chl
Growth stage	Nitrogen level	Sample No.	Leaf position	basal	centeral	top
Initial tillering	N0	1	L1	44.4993	54.5375	51.7104
Initial tillering	N0	1	L2	49.0593	45.1349	48.1654
Initial tillering	N0	1	L3	25.7025	25.399	29.4088
Initial tillering	N0	2	L1	56.4094	49.3507	47.8039
Initial tillering	N0	2	L2	50.9702	44.1218	49.3845
Initial tillering	N0	2	L3	41.1468	49.1549	47.8498
Initial tillering	N0	3	L1	43.2808	39.7001	42.7408
Initial tillering	N0	3	L2	44.3864	41.6314	39.4617
Initial tillering	N0	3	L3	24.9922	28.754	30.0528
Initial tillering	N0	4	L1	40.2306	43.4377	50.279
Initial tillering	N0	4	L2	41.6754	41.8144	42.8721
Initial tillering	N0	4	L3	25.9907	27.4673	30.6865
Initial tillering	N0	5	L1	49.3851	48.8725	43.4479
Initial tillering	N0	5	L2	42.4711	41.6397	42.3296
Initial tillering	N0	5	L3	33.4333	33.7686	37.686
Initial tillering	N0	6	L1	43.6851	47.2638	42.5731
Initial tillering	N0	6	L2	43.8068	44.5904	43.0105
Initial tillering	N0	6	L3	27.2404	34.6868	34.0919
Initial tillering	N1	1	L1	52.7191	51.7748	58.187
Initial tillering	N1	1	L2	52.4003	48.3216	44.4967
Initial tillering	N1	1	L3	28.6819	27.7166	27.0504
Initial tillering	N1	2	L1	35.6291	40.6973	47.9365
Initial tillering	N1	2	L2	48.6582	46.3495	44.1824
Initial tillering	N1	2	L3	50.4492	46.8806	47.9499
Initial tillering	N1	3	L1	48.5486	44.0523	37.0522
Initial tillering	N1	3	L2	51.5529	52.5979	38.1693
Initial tillering	N1	3	L3	41.611	40.1413	37.0975
Initial tillering	N1	4	L1	51.2118	45.0667	37.0452
Initial tillering	N1	4	L2	53.2929	44.0377	37.6541
Initial tillering	N1	4	L3	37.1982	34.7461	42.5693
Initial tillering	N1	5	L1	50.3351	43.5805	50.7285
Initial tillering	N1	5	L2	51.2226	47.7038	35.9556
Initial tillering	N1	5	L3	29.7627	42.0751	46.5262
Initial tillering	N1	6	L1	48.8221	48.6933	43.7941
Initial tillering	N1	6	L2	45.7795	50.1081	45.1152
Initial tillering	N1	6	L3	45.8312	43.3529	44.9953
Initial tillering	N2	1	L1	32.1338	30.2746	32.8014
Initial tillering	N2	1	L2	53.2361	47.7357	51.3062
Initial tillering	N2	1	L3	55.7495	57.5488	46.6983
Initial tillering	N2	2	L1	55.7367	44.6822	45.1981
Initial tillering	N2	2	L2	58.7468	47.1038	54.2984
Initial tillering	N2	2	L3	36.0831	35.7586	42.8103
Initial tillering	N2	3	L1	51.9201	47.6668	41.4803
Initial tillering	N2	3	L2	50.2656	44.922	42.9659
Initial tillering	N2	3	L3	34.2149	28.6003	32.1657
Initial tillering	N2	4	L1	40.7949	39.8863	38.3382
Initial tillering	N2	4	L2	52.0968	48.9962	42.1402
Initial tillering	N2	4	L3	37.9908	32.4157	36.5874
Initial tillering	N2	5	L1	48.7775	46.4949	52.3563
Initial tillering	N2	5	L2	48.1565	51.0262	41.4395
Initial tillering	N2	5	L3	41.0901	38.1909	41.9457
Initial tillering	N2	6	L1	45.346	50.812	40.8707
Initial tillering	N2	6	L2	44.5452	45.0776	44.7422
Initial tillering	N2	6	L3	26.043	31.3579	38.5563
Growth stage	Nitrogen level	Sample No.	Leaf position	basal	centeral	top
Tillering	N0	1	L1	53.7953	47.1956	48.5039
Tillering	N0	1	L2	33.6265	47.7337	51.9884
Tillering	N0	1	L3	42.1191	45.272	38.6921
Tillering	N0	2	L1	54.0745	46.7551	46.2086
Tillering	N0	2	L2	42.3665	42.29	41.3337
Tillering	N0	2	L3	24.9546	33.937	31.3943
Tillering	N0	3	L1	52.7866	50.2752	48.8923
Tillering	N0	3	L2	41.4522	41.0697	41.8201
Tillering	N0	3	L3	27.9047	37.8779	35.8733
Tillering	N0	4	L1	42.7618	38.8776	38.7265
Tillering	N0	4	L2	37.5228	36.5402	36.9706
Tillering	N0	4	L3	30.0815	37.306	39.1187
Tillering	N0	5	L1	33.2369	33.5984	32.6108
Tillering	N0	5	L2	43.8776	40.8861	38.7699
Tillering	N0	5	L3	39.2258	46.3094	41.3132
Tillering	N0	6	L1	43.1348	41.2201	23.3938
Tillering	N0	6	L2	40.7706	40.2077	32.081
Tillering	N0	6	L3	27.5101	35.2357	36.2967
Tillering	N1	1	L1	54.825	23.4346	36.618
Tillering	N1	1	L2	47.4666	43.606	42.4749
Tillering	N1	1	L3	51.5988	49.394	50.2765
Tillering	N1	2	L1	49.5349	40.9791	33.3134
Tillering	N1	2	L2	49.9672	48.0838	42.941
Tillering	N1	2	L3	21.9611	30.976	41.5447
Tillering	N1	3	L1	53.977	52.6808	24.7672
Tillering	N1	3	L2	46.822	45.135	49.2837
Tillering	N1	3	L3	24.7774	44.7435	41.0633
Tillering	N1	4	L1	53.5708	50.8579	43.2662
Tillering	N1	4	L2	52.858	35.5367	45.7368
Tillering	N1	4	L3	44.3233	46.1666	43.5741
Tillering	N1	5	L1	49.0261	40.434	36.5262
Tillering	N1	5	L2	43.9898	40.6941	44.3845
Tillering	N1	5	L3	31.1443	37.2307	34.5643
Tillering	N1	6	L1	56.25	31.3891	48.1654
Tillering	N1	6	L2	48.2642	47.7523	47.6879
Tillering	N1	6	L3	30.2319	39.6083	46.7959
Tillering	N2	1	L1	68.8806	48.3917	23.3862
Tillering	N2	1	L2	46.7391	33.9389	35.8242
Tillering	N2	1	L3	27.3067	30.3422	31.8093
Tillering	N2	2	L1	54.6873	46.5262	48.7615
Tillering	N2	2	L2	54.9321	49.0625	14.7634
Tillering	N2	2	L3	22.4514	0.72686	3.09767
Tillering	N2	3	L1	52.8459	49.262	46.5332
Tillering	N2	3	L2	40.4231	40.3575	47.1172
Tillering	N2	3	L3	56.0402	49.0867	48.2993
Tillering	N2	4	L1	55.3912	51.1474	39.6759
Tillering	N2	4	L2	56.1199	52.7369	47.7331
Tillering	N2	4	L3	41.6811	47.362	48.7
Growth stage	Nitrogen level	Sample No.	Leaf position	basal	centeral	top
Jointing	N0	1	L1	32.5319	42.1177	25.8811
Jointing	N0	1	L2	38.8491	38.1577	28.7961
Jointing	N0	1	L3	34.898	38.9408	38.4596
Jointing	N0	1	L4	25.1589	30.0683	29.5562
Jointing	N0	2	L1	38.9726	38.5203	33.4635
Jointing	N0	2	L2	39.9086	41.7155	37.6834
Jointing	N0	2	L3	38.5901	38.4715	39.6173
Jointing	N0	2	L4	27.8308	35.3887	38.6296
Jointing	N0	3	L1	41.7646	38.5123	37.1893
Jointing	N0	3	L2	40.2797	41.4133	39.0243
Jointing	N0	3	L3	33.4919	35.7114	35.8759
Jointing	N0	3	L4	18.8191	23.5124	27.1855
Jointing	N0	4	L1	44.5445	40.6679	34.2838
Jointing	N0	4	L2	39.2799	38.9924	39.0077
Jointing	N0	4	L3	34.1065	36.275	39.2219
Jointing	N0	4	L4	24.0467	30.6183	33.5659
Jointing	N0	5	L1	52.2153	50.9344	38.0162
Jointing	N0	5	L2	51.1913	46.7461	44.2786
Jointing	N0	5	L3	46.3189	51.5625	47.2562
Jointing	N0	5	L4	32.3143	38.9758	42.7803
Jointing	N0	6	L1	46.887	42.0407	37.0044
Jointing	N0	6	L2	47.4143	45.1802	32.7931
Jointing	N0	6	L3	36.4306	46.3323	37.7338
Jointing	N0	6	L4	23.3326	28.9988	28.9491
Jointing	N1	1	L1	45.6201	46.0887	34.8232
Jointing	N1	1	L2	43.6047	45.5749	43.803
Jointing	N1	1	L3	36.509	42.89	41.4357
Jointing	N1	1	L4	22.8582	29.2615	27.8958
Jointing	N1	2	L1	39.6312	38.6506	33.9057
Jointing	N1	2	L2	43.0475	39.6357	34.9144
Jointing	N1	2	L3	38.7329	47.5801	43.0111
Jointing	N1	2	L4	32.8811	37.6688	40.9944
Jointing	N1	3	L1	54.5444	47.3136	35.8261
Jointing	N1	3	L2	53.1086	40.8797	56.2079
Jointing	N1	3	L3	49.811	50.0992	47.728
Jointing	N1	3	L4	37.174	43.6085	50.3434
Jointing	N1	4	L1	61.5853	40.7585	49.2072
Jointing	N1	4	L2	56.3584	52.7299	42.0299
Jointing	N1	4	L3	53.3483	58.9056	55.0074
Jointing	N1	4	L4	38.5104	48.5505	52.1911
Jointing	N1	5	L1	48.3936	47.2032	43.4083
Jointing	N1	5	L2	47.1905	59.5922	42.4296
Jointing	N1	5	L3	39.702	46.0084	48.7297
Jointing	N1	5	L4	32.0937	38.2445	41.2998
Jointing	N1	6	L1	44.591	43.3465	30.6368
Jointing	N1	6	L2	50.5901	48.6799	45.8165
Jointing	N1	6	L3	31.6059	41.3515	47.0687
Jointing	N1	6	L4	54.0337	48.3356	48.3095
Jointing	N2	1	L1	52.6738	49.0185	42.545
Jointing	N2	1	L2	57.4882	47.0732	54.0822
Jointing	N2	1	L3	48.5651	46.3361	56.4158
Jointing	N2	1	L4	29.667	39.9532	37.1166
Jointing	N2	2	L1	58.1462	50.8369	43.3503
Jointing	N2	2	L2	53.4076	49.4227	42.9869
Jointing	N2	2	L3	47.9843	46.5159	43.3848
Jointing	N2	2	L4	30.8816	37.5278	43.5314
Jointing	N2	3	L1	61.1275	53.699	53.0098
Jointing	N2	3	L2	59.9646	50.0616	62.2574
Jointing	N2	3	L3	54.4093	58.4044	49.1122
Jointing	N2	3	L4	28.6214	39.82	38.0494
Jointing	N2	4	L1	68.7065	55.1852	53.3655
Jointing	N2	4	L2	61.5904	58.5861	56.6842
Jointing	N2	4	L3	62.346	67.0514	63.0658
Jointing	N2	4	L4	43.7794	54.9627	64.8351
Jointing	N2	5	L1	50.622	53.3662	46.785
Jointing	N2	5	L2	59.9148	58.9859	52.8453
Jointing	N2	5	L3	55.3032	57.6993	50.5978
Jointing	N2	5	L4	37.2294	43.4122	48.0793
Jointing	N2	6	L1	58.2405	56.9953	48.7424
Jointing	N2	6	L2	57.6591	56.8755	39.0988
Jointing	N2	6	L3	56.6217	64.3047	64.0509
Jointing	N2	6	L4	41.8927	1.79736	45.191
Growth stage	Nitrogen level	Sample No.	Leaf position	basal	centeral	top
Booting	N0	1	L1	39.9868	34.943	38.5747
Booting	N0	1	L2	22.6006	21.4192	37.9283
Booting	N0	1	L3	23.3141	31.4217	34.4751
Booting	N0	1	L4	22.9787	26.2508	30.0075
Booting	N0	2	L1	33.0175	32.5176	33.1807
Booting	N0	2	L2	26.8616	28.6054	34.3208
Booting	N0	2	L3	27.6899	17.6618	29.9163
Booting	N0	2	L4	23.1222	24.1104	29.6358
Booting	N0	3	L1	31.5695	32.9671	29.9654
Booting	N0	3	L2	22.4565	28.1291	32.978
Booting	N0	3	L3	23.4569	28.6016	29.405
Booting	N0	3	L4	28.3357	34.4847	32.7632
Booting	N0	4	L1	29.7805	24.6218	29.7677
Booting	N0	4	L2	22.6644	28.5831	31.6977
Booting	N0	4	L3	20.5686	27.1352	32.2397
Booting	N0	4	L4	21.0417	23.9695	28.7056
Booting	N1	1	L1	50.7157	52.1305	49.6375
Booting	N1	1	L2	43.5868	47.6674	47.355
Booting	N1	1	L3	40.6852	48.3745	43.4071
Booting	N1	1	L4	28.0182	33.5627	35.5973
Booting	N1	2	L1	44.0625	46.9896	46.0721
Booting	N1	2	L2	38.9745	46.2169	44.1396
Booting	N1	2	L3	37.0005	34.7065	39.5516
Booting	N1	2	L4	25.3888	33.0035	33.0399
Booting	N1	3	L1	47.0527	50.8942	46.1608
Booting	N1	3	L2	44.2244	44.9054	35.5124
Booting	N1	3	L3	36.8507	48.451	36.2017
Booting	N1	3	L4	26.6321	30.2581	29.0824
Booting	N1	4	L1	50.0539	57.4161	58.7123
Booting	N1	4	L2	50.8617	54.3787	41.7691
Booting	N1	4	L3	44.4355	36.5638	36.4586
Booting	N1	4	L4	28.9644	32.1925	32.1862
Booting	N2	1	L1	58.6033	62.4926	54.8645
Booting	N2	1	L2	43.9101	51.018	47.6101
Booting	N2	1	L3	35.7273	45.6903	46.0977
Booting	N2	1	L4	23.0189	28.4352	29.9253
Booting	N2	2	L1	52.7496	60.854	63.4088
Booting	N2	2	L2	55.5142	56.3667	55.9472
Booting	N2	2	L3	29.1283	44.5178	45.1694
Booting	N2	2	L4	22.8219	29.6817	28.3472
Booting	N2	3	L1	57.2465	59.6369	49.7096
Booting	N2	3	L2	43.0991	48.7947	45.0979
Booting	N2	3	L3	42.8842	49.7026	43.4089
Booting	N2	3	L4	31.655	33.0207	33.9229
Booting	N2	4	L1	49.869	50.191	62.8146
Booting	N2	4	L2	45.9599	55.9178	55.0845
Booting	N2	4	L3	41.3776	46.7346	48.8164
Booting	N2	4	L4	31.1864	34.7563	36.9808
Growth stage	Nitrogen level	Sample No.	Leaf position	basal	centeral	top
Initial heading	N0	1	L1	28.2828	32.1109	38.0698
Initial heading	N0	1	L2	22.2276	28.7036	37.8141
Initial heading	N0	1	L3	24.1633	33.4804	40.5341
Initial heading	N0	1	L4	26.0085	30.2332	34.3616
Initial heading	N0	2	L1	29.2149	33.5837	34.5662
Initial heading	N0	2	L2	27.853	30.2848	37.7025
Initial heading	N0	2	L3	23.5206	44.0037	41.9597
Initial heading	N0	2	L4	29.3763	39.3259	40.5131
Initial heading	N0	3	L1	25.3932	31.0697	28.9867
Initial heading	N0	3	L2	21.627	26.4861	34.0332
Initial heading	N0	3	L3	24.4286	30.1892	34.3118
Initial heading	N0	3	L4	33.8362	33.5818	33.8209
Initial heading	N0	4	L1	30.8771	39.1868	42.4564
Initial heading	N0	4	L2	25.4054	30.8408	34.8028
Initial heading	N0	4	L3	24.836	32.0605	40.0317
Initial heading	N0	4	L4	37.0325	39.2685	39.8391
Initial heading	N1	1	L1	45.0106	46.7455	40.339
Initial heading	N1	1	L2	46.4471	47.7191	38.7699
Initial heading	N1	1	L3	50.8808	53.2335	46.4789
Initial heading	N1	1	L4	52.0852	51.1218	46.7276
Initial heading	N1	2	L1	45.7368	47.8115	52.7955
Initial heading	N1	2	L2	54.5916	44.1772	36.5198
Initial heading	N1	2	L3	44.0153	48.9732	38.2457
Initial heading	N1	2	L4	52.2318	52.0756	44.4201
Initial heading	N1	3	L1	46.8098	49.8339	47.6304
Initial heading	N1	3	L2	42.7834	47.2963	52.2848
Initial heading	N1	3	L3	40.9255	47.7401	51.162
Initial heading	N1	3	L4	37.9582	45.2095	44.8455
Initial heading	N1	4	L1	42.2389	51.3724	56.4489
Initial heading	N1	4	L2	39.848	49.167	49.1766
Initial heading	N1	4	L3	40.2822	45.1866	44.6427
Initial heading	N1	4	L4	3.60741	3.69093	3.5411
Initial heading	N2	1	L1	48.581	52.3543	51.4374
Initial heading	N2	1	L2	40.439	47.253	42.2511
Initial heading	N2	1	L3	39.8104	42.3136	42.6579
Initial heading	N2	1	L4	23.0629	45.0992	48.1558
Initial heading	N2	2	L1	47.01	52.3759	53.6065
Initial heading	N2	2	L2	42.2402	42.2231	48.5263
Initial heading	N2	2	L3	35.3435	42.6777	44.2174
Initial heading	N2	2	L4	40.3313	41.7901	42.6298
Initial heading	N2	3	L1	56.0924	55.0028	53.3687
Initial heading	N2	3	L2	48.637	51.1805	44.5572
Initial heading	N2	3	L3	41.2163	45.6348	45.6399
Initial heading	N2	3	L4	44.9653	44.6382	48.0786
Initial heading	N2	4	L1	39.7536	52.5736	54.4902
Initial heading	N2	4	L2	34.7301	47.7599	37.5457
Initial heading	N2	4	L3	30.4449	39.0345	43.854
Initial heading	N2	4	L4	36.5338	41.7461	42.8128
Growth stage	Nitrogen level	Sample No.	Leaf position	basal	centeral	top
Heading	N0	1	L1	19.9705	23.1738	21.0538
Heading	N0	1	L2	17.088	25.047	30.8657
Heading	N0	1	L3	19.7225	23.8184	31.5243
Heading	N0	1	L4	31.5243	21.9904	27.2123
Heading	N0	1	L5	26.7851	30.5207	31.2954
Heading	N0	2	L1	29.8614	11.1348	11.2802
Heading	N0	2	L2	17.1632	57.8981	32.0382
Heading	N0	2	L3	28.8005	33.8374	37.1491
Heading	N0	2	L4	28.3861	34.8175	36.6084
Heading	N0	2	L5	28.7591	34.4713	32.3895
Heading	N0	3	L1	23.1878	22.2748	27.7899
Heading	N0	3	L2	15.832	22.3436	34.644
Heading	N0	3	L3	16.4185	26.3139	30.1949
Heading	N0	3	L4	25.2421	27.8767	30.4404
Heading	N0	3	L5	31.2444	29.8092	30.6387
Heading	N0	4	L1	19.7697	23.8299	26.736
Heading	N0	4	L2	19.6894	26.5269	28.5397
Heading	N0	4	L3	21.0328	25.7382	29.7078
Heading	N0	4	L4	22.6344	29.7206	33.7106
Heading	N0	4	L5	37.5336	36.2297	31.4197
Heading	N1	1	L1	19.9705	23.1738	21.0538
Heading	N1	1	L2	17.088	25.047	30.8657
Heading	N1	1	L3	19.7225	23.8184	31.5243
Heading	N1	1	L4	31.5243	21.9904	27.2123
Heading	N1	1	L5	26.7851	30.5207	31.2954
Heading	N1	2	L1	29.8614	11.1348	11.2802
Heading	N1	2	L2	17.1632	57.8981	32.0382
Heading	N1	2	L3	28.8005	33.8374	37.1491
Heading	N1	2	L4	28.3861	34.8175	36.6084
Heading	N1	2	L5	28.7591	34.4713	32.3895
Heading	N1	3	L1	23.1878	22.2748	27.7899
Heading	N1	3	L2	15.832	22.3436	34.644
Heading	N1	3	L3	16.4185	26.3139	30.1949
Heading	N1	3	L4	25.2421	27.8767	30.4404
Heading	N1	3	L5	31.2444	29.8092	30.6387
Heading	N1	4	L1	19.7697	23.8299	26.736
Heading	N1	4	L2	19.6894	26.5269	28.5397
Heading	N1	4	L3	21.0328	25.7382	29.7078
Heading	N1	4	L4	22.6344	29.7206	33.7106
Heading	N1	4	L5	37.5336	36.2297	31.4197
Heading	N2	1	L1	42.3262	42.1114	44.1836
Heading	N2	1	L2	47.8452	46.7352	42.573
Heading	N2	1	L3	39.5751	43.8897	47.4321
Heading	N2	1	L4	30.3594	40.0967	47.6279
Heading	N2	1	L5	35.5265	46.1761	42.5706
Heading	N2	2	L1	48.1646	47.2433	41.6562
Heading	N2	2	L2	41.7301	50.2929	43.6863
Heading	N2	2	L3	43.5594	47.6827	49.3582
Heading	N2	2	L4	32.7414	44.7715	46.8774
Heading	N2	2	L5	34.2966	43.9917	43.036
Heading	N2	3	L1	68.424	45.0609	40.2802
Heading	N2	3	L2	52.6361	44.9123	45.9529
Heading	N2	3	L3	34.4814	42.9779	47.1337
Heading	N2	3	L4	34.0657	44.0389	44.7109
Heading	N2	3	L5	38.9918	49.3736	48.7239
Heading	N2	4	L1	48.6511	49.5635	48.7825
Heading	N2	4	L2	46.2366	50.2872	50.5244
Heading	N2	4	L3	41.009	46.0466	49.1466
Heading	N2	4	L4	34.6325	20.9722	46.419
Heading	N2	4	L5	43.7565	43.847	46.6435
Growth stage	Nitrogen level	Sample No.	Leaf position	basal	centeral	top
Initial filling	N0	1	L1	15.1784	6.34719	9.97125
Initial filling	N0	1	L2	15.0216	23.7534	26.2272
Initial filling	N0	1	L3	16.6379	16.2662	24.4968
Initial filling	N0	1	L4	21.3388	24.7818	27.3921
Initial filling	N0	1	L5	25.2906	25.5705	23.5812
Initial filling	N0	2	L1	12.2015	9.6939	14.1615
Initial filling	N0	2	L2	4.28014	13.9084	12.2959
Initial filling	N0	2	L3	16.4262	20.5699	24.7958
Initial filling	N0	2	L4	16.1074	22.2869	26.977
Initial filling	N0	2	L5	19.9081	21.2285	20.5744
Initial filling	N0	3	L1	11.9254	12.1633	15.612
Initial filling	N0	3	L2	17.5719	22.0988	15.9053
Initial filling	N0	3	L3	17.8206	17.4878	21.4854
Initial filling	N0	3	L4	20.2071	20.5756	30.6195
Initial filling	N0	3	L5	30.2453	31.8877	26.6493
Initial filling	N0	4	L1	21.1405	12.799	8.81275
Initial filling	N0	4	L2	23.4352	29.1671	33.9981
Initial filling	N0	4	L3	27.6535	29.0224	26.1953
Initial filling	N0	4	L4	22.8773	30.9141	35.0317
Initial filling	N0	4	L5	35.8095	34.3373	29.2322
Initial filling	N1	1	L1	27.2773	25.1076	24.3922
Initial filling	N1	1	L2	26.0429	32.0382	33.796
Initial filling	N1	1	L3	27.4813	29.8978	31.8749
Initial filling	N1	1	L4	23.7699	33.7813	36.2367
Initial filling	N1	1	L5	33.3063	34.8315	30.9135
Initial filling	N1	2	L1	37.9486	30.3683	38.8412
Initial filling	N1	2	L2	35.2707	38.9286	38.6302
Initial filling	N1	2	L3	28.9133	25.3288	28.6825
Initial filling	N1	2	L4	26.5791	34.586	38.0965
Initial filling	N1	2	L5	30.902	33.3497	35.2861
Initial filling	N1	3	L1	21.3649	15.2403	14.2597
Initial filling	N1	3	L2	31.4599	31.354	35.5902
Initial filling	N1	3	L3	27.116	34.8984	38.3292
Initial filling	N1	3	L4	25.1082	32.7841	38.4752
Initial filling	N1	3	L5	33.9624	41.6932	41.2864
Initial filling	N1	4	L1	13.2574	13.7706	13.9383
Initial filling	N1	4	L2	28.314	31.6269	36.8443
Initial filling	N1	4	L3	31.7085	37.99	28.9019
Initial filling	N1	4	L4	28.863	34.1352	38.5339
Initial filling	N1	4	L5	39.0638	36.1296	38.4728
Initial filling	N2	1	L1	26.5115	20.3945	20.4825
Initial filling	N2	1	L2	37.2421	31.5306	42.5622
Initial filling	N2	1	L3	29.8678	36.1646	39.2142
Initial filling	N2	1	L4	29.9839	33.5882	38.9069
Initial filling	N2	1	L5	34.1435	36.9432	37.8307
Initial filling	N2	2	L1	41.9909	18.2911	24.9966
Initial filling	N2	2	L2	44.8766	30.8491	34.1071
Initial filling	N2	2	L3	39.8754	49.0959	40.8981
Initial filling	N2	2	L4	33.7858	43.4357	42.2581
Initial filling	N2	2	L5	45.3714	46.1461	44.6663
Initial filling	N2	3	L1	24.0326	21.0882	16.0985
Initial filling	N2	3	L2	37.2753	38.9783	39.7995
Initial filling	N2	3	L3	37.5329	38.5377	39.9742
Initial filling	N2	3	L4	36.778	41.4522	44.672
Initial filling	N2	3	L5	35.8063	43.9516	41.1391
Initial filling	N2	4	L1	28.9733	22.9633	17.8008
Initial filling	N2	4	L2	33.7622	36.7857	33.5372
Initial filling	N2	4	L3	29.1722	30.5124	33.4561
Initial filling	N2	4	L4	31.8176	32.6107	39.6988
Initial filling	N2	4	L5	35.2198	40.4952	39.4731
Growth stage	Nitrogen level	Sample No.	Leaf position	basal	centeral	top
Filling	N0	1	L1	11.6896	8.04	5.84989
Filling	N0	1	L2	8.1044	5.72555	3.94349
Filling	N0	1	L3	7.68933	7.1901	7.3597
Filling	N0	1	L4	8.36836	6.48174	4.0047
Filling	N0	2	L1	13.7719	9.81378	0.810382
Filling	N0	2	L2	12.9061	12.4279	6.42245
Filling	N0	2	L3	14.3764	16.1795	16.2554
Filling	N0	2	L4	16.3089	14.9846	9.22401
Filling	N0	3	L1	10.0044	10.1013	4.38789
Filling	N0	3	L2	11.5971	8.3862	6.84134
Filling	N0	3	L3	6.98351	10.2773	11.6577
Filling	N0	3	L4	10.6675	9.06652	8.5794
Filling	N0	4	L1	10.8938	6.476	11.3281
Filling	N0	4	L2	12.396	13.6119	11.6596
Filling	N0	4	L3	10.6669	5.9213	12.3042
Filling	N0	4	L4	12.8857	11.3236	9.10159
Filling	N1	1	L1	26.8865	15.1695	1.49068
Filling	N1	1	L2	15.6968	15.7752	11.1801
Filling	N1	1	L3	7.84235	11.3803	11.6347
Filling	N1	1	L4	16.3051	13.9543	10.1115
Filling	N1	2	L1	26.9528	19.7238	16.6647
Filling	N1	2	L2	13.9772	11.9369	11.2286
Filling	N1	2	L3	11.5895	11.986	8.61574
Filling	N1	2	L4	16.0162	15.1077	7.84299
Filling	N1	3	L1	20.5514	16.8394	8.48822
Filling	N1	3	L2	24.0683	23.2745	24.6281
Filling	N1	3	L3	22.0421	22.2295	18.4499
Filling	N1	3	L4	22.8633	19.3763	16.2859
Filling	N1	4	L1	32.9882	25.1956	11.928
Filling	N1	4	L2	27.605	22.475	23.2911
Filling	N1	4	L3	20.9805	19.2093	20.2065
Filling	N1	4	L4	19.2813	23.5309	23.177
Filling	N2	1	L1	24.4904	17.7594	8.66166
Filling	N2	1	L2	18.0903	18.1993	11.9548
Filling	N2	1	L3	16.2311	14.8093	16.3051
Filling	N2	1	L4	19.4745	11.2815	11.3249
Filling	N2	2	L1	25.5501	17.7945	9.88583
Filling	N2	2	L2	18.9689	18.0444	17.0377
Filling	N2	2	L3	15.8434	14.8858	16.0067
Filling	N2	2	L4	18.0833	18.8114	8.80129
Filling	N2	3	L1	20.3792	21.5626	21.2783
Filling	N2	3	L2	16.4191	19.924	20.596
Filling	N2	3	L3	16.6009	16.4441	17.813
Filling	N2	3	L4	26.7941	20.121	16.1425
Filling	N2	4	L1	18.0189	20.1172	10.3806
Filling	N2	4	L2	15.7478	15.8116	12.8927
Filling	N2	4	L3	15.0962	18.0195	17.1843
Filling	N2	4	L4	22.0389	17.9271	13.4723

## Sheet: Chl content
Initial tillering	L1			L2			L3
	basal	centeral	top	basal	centeral	top	basal	centeral	top
N0-1	44.4993	54.5375	51.7104	49.0593	45.1349	48.1654	25.7025	25.399	29.4088
N0-2	56.4094	49.3507	47.8039	50.9702	44.1218	49.3845	41.1468	49.1549	47.8498
N0-3	43.2808	39.7001	42.7408	44.3864	41.6314	39.4617	24.9922	28.754	30.0528
N0-4	40.2306	43.4377	50.279	41.6754	41.8144	42.8721	25.9907	27.4673	30.6865
N0-5	49.3851	48.8725	43.4479	42.4711	41.6397	42.3296	33.4333	33.7686	37.686
N0-6	43.6851	47.2638	42.5731	43.8068	44.5904	43.0105	27.2404	34.6868	34.0919
N1-1	52.7191	51.7748	58.187	52.4003	48.3216	44.4967	28.6819	27.7166	27.0504
N1-2	35.6291	40.6973	47.9365	48.6582	46.3495	44.1824	50.4492	46.8806	47.9499
N1-3	48.5486	44.0523	37.0522	51.5529	52.5979	38.1693	41.611	40.1413	37.0975
N1-4	51.2118	45.0667	37.0452	53.2929	44.0377	37.6541	37.1982	34.7461	42.5693
N1-5	50.3351	43.5805	50.7285	51.2226	47.7038	35.9556	29.7627	42.0751	46.5262
N1-6	48.8221	48.6933	43.7941	45.7795	50.1081	45.1152	45.8312	43.3529	44.9953
N2-1	32.1338	30.2746	32.8014	53.2361	47.7357	51.3062	55.7495	57.5488	46.6983
N2-2	55.7367	44.6822	45.1981	58.7468	47.1038	54.2984	36.0831	35.7586	42.8103
N2-3	51.9201	47.6668	41.4803	50.2656	44.922	42.9659	34.2149	28.6003	32.1657
N2-4	40.7949	39.8863	38.3382	52.0968	48.9962	42.1402	37.9908	32.4157	36.5874
N2-5	48.7775	46.4949	52.3563	48.1565	51.0262	41.4395	41.0901	38.1909	41.9457
N2-6	45.346	50.812	40.8707	44.5452	45.0776	44.7422	26.043	31.3579	38.5563
Tillering	L1			L2			L3
	basal	centeral	top	basal	centeral	top	basal	centeral	top
N0-1	53.7953	47.1956	48.5039	33.6265	47.7337	51.9884	42.1191	45.272	38.6921
N0-2	54.0745	46.7551	46.2086	42.3665	42.29	41.3337	24.9546	33.937	31.3943
N0-3	52.7866	50.2752	48.8923	41.4522	41.0697	41.8201	27.9047	37.8779	35.8733
N0-4	42.7618	38.8776	38.7265	37.5228	36.5402	36.9706	30.0815	37.306	39.1187
N0-5	33.2369	33.5984	32.6108	43.8776	40.8861	38.7699	39.2258	46.3094	41.3132
N0-6	43.1348	41.2201	23.3938	40.7706	40.2077	32.081	27.5101	35.2357	36.2967
N1-1	54.825	23.4346	36.618	47.4666	43.606	42.4749	51.5988	49.394	50.2765
N1-2	49.5349	40.9791	33.3134	49.9672	48.0838	42.941	21.9611	30.976	41.5447
N1-3	53.977	52.6808	24.7672	46.822	45.135	49.2837	24.7774	44.7435	41.0633
N1-4	53.5708	50.8579	43.2662	52.858	35.5367	45.7368	44.3233	46.1666	43.5741
N1-5	49.0261	40.434	36.5262	43.9898	40.6941	44.3845	31.1443	37.2307	34.5643
N1-6	56.25	31.3891	48.1654	48.2642	47.7523	47.6879	30.2319	39.6083	46.7959
N2-1	68.8806	48.3917	23.3862	46.7391	33.9389	35.8242	27.3067	30.3422	31.8093
N2-2	54.6873	46.5262	48.7615	54.9321	49.0625	14.7634	22.4514	0.72686	3.09767
N2-3	52.8459	49.262	46.5332	40.4231	40.3575	47.1172	56.0402	49.0867	48.2993
N2-4	55.3912	51.1474	39.6759	56.1199	52.7369	47.7331	41.6811	47.362	48.7
Jointing	L1			L2			L3			L4
	basal	centeral	top	basal	centeral	top	basal	centeral	top	basal	centeral	top
N0-1	32.5319	42.1177	25.8811	38.8491	38.1577	28.7961	34.898	38.9408	38.4596	25.1589	30.0683	29.5562
N0-2	38.9726	38.5203	33.4635	39.9086	41.7155	37.6834	38.5901	38.4715	39.6173	27.8308	35.3887	38.6296
N0-3	41.7646	38.5123	37.1893	40.2797	41.4133	39.0243	33.4919	35.7114	35.8759	18.8191	23.5124	27.1855
N0-4	44.5445	40.6679	34.2838	39.2799	38.9924	39.0077	34.1065	36.275	39.2219	24.0467	30.6183	33.5659
N0-5	52.2153	50.9344	38.0162	51.1913	46.7461	44.2786	46.3189	51.5625	47.2562	32.3143	38.9758	42.7803
N0-6	46.887	42.0407	37.0044	47.4143	45.1802	32.7931	36.4306	46.3323	37.7338	23.3326	28.9988	28.9491
N1-1	45.6201	46.0887	34.8232	43.6047	45.5749	43.803	36.509	42.89	41.4357	22.8582	29.2615	27.8958
N1-2	39.6312	38.6506	33.9057	43.0475	39.6357	34.9144	38.7329	47.5801	43.0111	32.8811	37.6688	40.9944
N1-3	54.5444	47.3136	35.8261	53.1086	40.8797	56.2079	49.811	50.0992	47.728	37.174	43.6085	50.3434
N1-4	61.5853	40.7585	49.2072	56.3584	52.7299	42.0299	53.3483	58.9056	55.0074	38.5104	48.5505	52.1911
N1-5	48.3936	47.2032	43.4083	47.1905	59.5922	42.4296	39.702	46.0084	48.7297	32.0937	38.2445	41.2998
N1-6	44.591	43.3465	30.6368	50.5901	48.6799	45.8165	31.6059	41.3515	47.0687	54.0337	48.3356	48.3095
N2-1	52.6738	49.0185	42.545	57.4882	47.0732	54.0822	48.5651	46.3361	56.4158	29.667	39.9532	37.1166
N2-2	58.1462	50.8369	43.3503	53.4076	49.4227	42.9869	47.9843	46.5159	43.3848	30.8816	37.5278	43.5314
N2-3	61.1275	53.699	53.0098	59.9646	50.0616	62.2574	54.4093	58.4044	49.1122	28.6214	39.82	38.0494
N2-4	68.7065	55.1852	53.3655	61.5904	58.5861	56.6842	62.346	67.0514	63.0658	43.7794	54.9627	64.8351
N2-5	50.622	53.3662	46.785	59.9148	58.9859	52.8453	55.3032	57.6993	50.5978	37.2294	43.4122	48.0793
N2-6	58.2405	56.9953	48.7424	57.6591	56.8755	39.0988	56.6217	64.3047	64.0509	41.8927	1.79736	45.191
Booting	L1			L2			L3			L4
	basal	centeral	top	basal	centeral	top	basal	centeral	top	basal	centeral	top
N0-1	39.9868	34.943	38.5747	22.6006	21.4192	37.9283	23.3141	31.4217	34.4751	22.9787	26.2508	30.0075
N0-2	33.0175	32.5176	33.1807	26.8616	28.6054	34.3208	27.6899	17.6618	29.9163	23.1222	24.1104	29.6358
N0-3	31.5695	32.9671	29.9654	22.4565	28.1291	32.978	23.4569	28.6016	29.405	28.3357	34.4847	32.7632
N0-4	29.7805	24.6218	29.7677	22.6644	28.5831	31.6977	20.5686	27.1352	32.2397	21.0417	23.9695	28.7056
N1-1	50.7157	52.1305	49.6375	43.5868	47.6674	47.355	40.6852	48.3745	43.4071	28.0182	33.5627	35.5973
N1-2	44.0625	46.9896	46.0721	38.9745	46.2169	44.1396	37.0005	34.7065	39.5516	25.3888	33.0035	33.0399
N1-3	47.0527	50.8942	46.1608	44.2244	44.9054	35.5124	36.8507	48.451	36.2017	26.6321	30.2581	29.0824
N1-4	50.0539	57.4161	58.7123	50.8617	54.3787	41.7691	44.4355	36.5638	36.4586	28.9644	32.1925	32.1862
N2-1	58.6033	62.4926	54.8645	43.9101	51.018	47.6101	35.7273	45.6903	46.0977	23.0189	28.4352	29.9253
N2-2	52.7496	60.854	63.4088	55.5142	56.3667	55.9472	29.1283	44.5178	45.1694	22.8219	29.6817	28.3472
N2-3	57.2465	59.6369	49.7096	43.0991	48.7947	45.0979	42.8842	49.7026	43.4089	31.655	33.0207	33.9229
N2-4	49.869	50.191	62.8146	45.9599	55.9178	55.0845	41.3776	46.7346	48.8164	31.1864	34.7563	36.9808
Initial heading	L1			L2			L3			L4
	basal	centeral	top	basal	centeral	top	basal	centeral	top	basal	centeral	top
N0-1	28.2828	32.1109	38.0698	22.2276	28.7036	37.8141	24.1633	33.4804	40.5341	26.0085	30.2332	34.3616
N0-2	29.2149	33.5837	34.5662	27.853	30.2848	37.7025	23.5206	44.0037	41.9597	29.3763	39.3259	40.5131
N0-3	25.3932	31.0697	28.9867	21.627	26.4861	34.0332	24.4286	30.1892	34.3118	33.8362	33.5818	33.8209
N0-4	30.8771	39.1868	42.4564	25.4054	30.8408	34.8028	24.836	32.0605	40.0317	37.0325	39.2685	39.8391
N1-1	45.0106	46.7455	40.339	46.4471	47.7191	38.7699	50.8808	53.2335	46.4789	52.0852	51.1218	46.7276
N1-2	45.7368	47.8115	52.7955	54.5916	44.1772	36.5198	44.0153	48.9732	38.2457	52.2318	52.0756	44.4201
N1-3	46.8098	49.8339	47.6304	42.7834	47.2963	52.2848	40.9255	47.7401	51.162	37.9582	45.2095	44.8455
N1-4	42.2389	51.3724	56.4489	39.848	49.167	49.1766	40.2822	45.1866	44.6427	3.60741	3.69093	3.5411
N2-1	48.581	52.3543	51.4374	40.439	47.253	42.2511	39.8104	42.3136	42.6579	23.0629	45.0992	48.1558
N2-2	47.01	52.3759	53.6065	42.2402	42.2231	48.5263	35.3435	42.6777	44.2174	40.3313	41.7901	42.6298
N2-3	56.0924	55.0028	53.3687	48.637	51.1805	44.5572	41.2163	45.6348	45.6399	44.9653	44.6382	48.0786
N2-4	39.7536	52.5736	54.4902	34.7301	47.7599	37.5457	30.4449	39.0345	43.854	36.5338	41.7461	42.8128
Heading	L1			L2			L3			L4			L5
	basal	centeral	top	basal	centeral	top	basal	centeral	top	basal	centeral	top	basal	centeral	top
N0-1	19.9705	23.1738	21.0538	17.088	25.047	30.8657	19.7225	23.8184	31.5243	21.9904	27.2123	32.0924	26.7851	30.5207	31.2954
N0-2	29.8614	11.1348	11.2802	17.1632	57.8981	32.0382	28.8005	33.8374	37.1491	28.3861	34.8175	36.6084	28.7591	34.4713	32.3895
N0-3	23.1878	22.2748	27.7899	15.832	22.3436	34.644	16.4185	26.3139	30.1949	25.2421	27.8767	30.4404	31.2444	29.8092	30.6387
N0-4	19.7697	23.8299	26.736	19.6894	26.5269	28.5397	21.0328	25.7382	29.7078	22.6344	29.7206	33.7106	37.5336	36.2297	31.4197
N1-1	41.6778	44.232	47.7534	43.3936	48.0531	40.8866	39.1664	48.5211	40.7929	41.9661	45.886	50.7852	42.2466	46.6192	42.0554
N1-2	45.9292	43.4318	38.6621	38.0085	40.5767	38.0232	39.7237	43.2023	41.2201	30.3435	39.2653	38.766	34.9258	39.2168	41.713
N1-3	36.7078	30.4436	24.1028	37.5903	32.955	28.7304	33.5595	39.9334	41.5657	30.121	35.9625	38.1635	39.1059	43.6219	35.172
N1-4	35.0692	32.8217	27.9672	33.8865	28.7425	47.1063	30.7847	37.7427	38.9286	28.9267	33.657	40.666	35.9492	43.0946	40.1247
N2-1	42.3262	42.1114	44.1836	47.8452	46.7352	42.573	39.5751	43.8897	47.4321	30.3594	40.0967	47.6279	35.5265	46.1761	42.5706
N2-2	48.1646	47.2433	41.6562	41.7301	50.2929	43.6863	43.5594	47.6827	49.3582	32.7414	44.7715	46.8774	34.2966	43.9917	43.036
N2-3	68.424	45.0609	40.2802	52.6361	44.9123	45.9529	34.4814	42.9779	47.1337	34.0657	44.0389	44.7109	38.9918	49.3736	48.7239
N2-4	48.6511	49.5635	48.7825	46.2366	50.2872	50.5244	41.009	46.0466	49.1466	34.6325	20.9722	46.419	43.7565	43.847	46.6435
Initial filling	L1			L2			L3			L4			L5
	basal	centeral	top	basal	centeral	top	basal	centeral	top	basal	centeral	top	basal	centeral	top
N0-1	15.1784	6.34719	9.97125	15.0216	23.7534	26.2272	16.6379	16.2662	24.4968	21.3388	24.7818	27.3921	25.2906	25.5705	23.5812
N0-2	12.2015	9.6939	14.1615	4.28014	13.9084	12.2959	16.4262	20.5699	24.7958	16.1074	22.2869	26.977	19.9081	21.2285	20.5744
N0-3	11.9254	12.1633	15.612	17.5719	22.0988	15.9053	17.8206	17.4878	21.4854	20.2071	20.5756	30.6195	30.2453	31.8877	26.6493
N0-4	21.1405	12.799	8.81275	23.4352	29.1671	33.9981	27.6535	29.0224	26.1953	22.8773	30.9141	35.0317	35.8095	34.3373	29.2322
N1-1	27.2773	25.1076	24.3922	26.0429	32.0382	33.796	27.4813	29.8978	31.8749	23.7699	33.7813	36.2367	33.3063	34.8315	30.9135
N1-2	37.9486	30.3683	38.8412	35.2707	38.9286	38.6302	28.9133	25.3288	28.6825	26.5791	34.586	38.0965	30.902	33.3497	35.2861
N1-3	21.3649	15.2403	14.2597	31.4599	31.354	35.5902	27.116	34.8984	38.3292	25.1082	32.7841	38.4752	33.9624	41.6932	41.2864
N1-4	13.2574	13.7706	13.9383	28.314	31.6269	36.8443	31.7085	37.99	28.9019	28.863	34.1352	38.5339	39.0638	36.1296	38.4728
N2-1	26.5115	20.3945	20.4825	37.2421	31.5306	42.5622	29.8678	36.1646	39.2142	29.9839	33.5882	38.9069	34.1435	36.9432	37.8307
N2-2	41.9909	18.2911	24.9966	44.8766	30.8491	34.1071	39.8754	49.0959	40.8981	33.7858	43.4357	42.2581	45.3714	46.1461	44.6663
N2-3	24.0326	21.0882	16.0985	37.2753	38.9783	39.7995	37.5329	38.5377	39.9742	36.778	41.4522	44.672	35.8063	43.9516	41.1391
N2-4	28.9733	22.9633	17.8008	33.7622	36.7857	33.5372	29.1722	30.5124	33.4561	31.8176	32.6107	39.6988	35.2198	40.4952	39.4731
Filling	L1			L2			L3			L4
	basal	centeral	top	basal	centeral	top	basal	centeral	top	basal	centeral	top
N0-1	11.6896	8.04	5.84989	8.1044	5.72555	3.94349	7.68933	7.1901	7.3597	8.36836	6.48174	4.0047
N0-2	13.7719	9.81378	0.810382	12.9061	12.4279	6.42245	14.3764	16.1795	16.2554	16.3089	14.9846	9.22401
N0-3	10.0044	10.1013	4.38789	11.5971	8.3862	6.84134	6.98351	10.2773	11.6577	10.6675	9.06652	8.5794
N0-4	10.8938	6.476	11.3281	12.396	13.6119	11.6596	10.6669	5.9213	12.3042	12.8857	11.3236	9.10159
N1-1	26.8865	15.1695	1.49068	15.6968	15.7752	11.1801	7.84235	11.3803	11.6347	16.3051	13.9543	10.1115
N1-2	26.9528	19.7238	16.6647	13.9772	11.9369	11.2286	11.5895	11.986	8.61574	16.0162	15.1077	7.84299
N1-3	20.5514	16.8394	8.48822	24.0683	23.2745	24.6281	22.0421	22.2295	18.4499	22.8633	19.3763	16.2859
N1-4	32.9882	25.1956	11.928	27.605	22.475	23.2911	20.9805	19.2093	20.2065	19.2813	23.5309	23.177
N2-1	24.4904	17.7594	8.66166	18.0903	18.1993	11.9548	16.2311	14.8093	16.3051	19.4745	11.2815	11.3249
N2-2	25.5501	17.7945	9.88583	18.9689	18.0444	17.0377	15.8434	14.8858	16.0067	18.0833	18.8114	8.80129
N2-3	20.3792	21.5626	21.2783	16.4191	19.924	20.596	16.6009	16.4441	17.813	26.7941	20.121	16.1425
N2-4	18.0189	20.1172	10.3806	15.7478	15.8116	12.8927	15.0962	18.0195	17.1843	22.0389	17.9271	13.4723

## Sheet: OJIP transients
Growth stage	Nitrogen level	Sample No.	Leaf position	1e-05	2e-05	3e-05	4e-05	5e-05	6e-05	7e-05	8e-05	9e-05	0.0001	0.00011	0.00012	0.00013	0.00014	0.00015	0.00016	0.00017	0.00018	0.00019	0.0002	0.00021	0.00022	0.00023	0.00024	0.00025	0.00026	0.00027	0.00028	0.00029	0.0003	0.0004	0.0005	0.0006	0.0007	0.0008	0.0009	0.001	0.0011	0.0012	0.0013	0.0014	0.0015	0.0016	0.0017	0.0018	0.0019
Initial tillering	N0	1	L1	515	514	527	544	559	575	588	603	620	632	649	665	680	693	709	721	735	746	759	771	781	794	804	812	820	831	840	850	857	864	923	957	994	1015	1033	1044	1052	1060	1065	1070	1070	1073	1073	1077	1077	1077
Initial tillering	N0	1	L2	508	500	509	518	528	537	547	556	565	573	580	588	596	603	611	617	626	632	636	642	647	651	658	662	666	672	674	676	682	688	714	735	750	762	771	779	787	793	800	802	807	813	813	815	818	820
Initial tillering	N0	1	L3	412	401	409	413	421	428	434	441	446	452	455	463	468	477	481	486	490	495	499	503	509	515	515	519	522	524	527	531	535	538	555	562	566	566	569	571	565	565	565	565	565	563	560	560	562	559
Initial tillering	N0	2	L1	563	557	564	574	584	590	601	612	621	629	637	646	651	660	667	674	681	689	692	697	701	706	712	717	721	725	725	727	734	739	763	784	797	804	813	821	832	835	841	844	851	854	857	861	862	865
Initial tillering	N0	2	L2	515	509	518	527	536	543	551	557	569	575	584	591	598	605	611	616	623	625	635	640	645	649	652	658	661	666	669	674	678	679	705	724	740	750	760	766	774	780	788	789	788	796	800	803	804	806
Initial tillering	N0	2	L3	464	454	462	468	479	484	491	498	504	509	517	522	529	536	543	546	552	555	561	567	573	574	580	583	589	589	592	596	601	602	625	639	647	655	660	662	665	668	672	674	673	674	677	679	679	678
Initial tillering	N0	3	L1	492	484	496	512	526	544	555	570	583	598	611	625	637	653	664	680	687	700	710	722	733	743	752	761	770	774	787	794	804	810	866	905	931	955	976	988	1001	1007	1018	1026	1031	1034	1033	1035	1038	1040
Initial tillering	N0	3	L2	503	492	503	512	525	533	544	552	561	568	579	588	595	601	610	616	623	627	635	640	651	651	655	658	662	669	671	676	680	681	705	721	732	741	754	755	759	765	769	775	777	778	782	785	789	789
Initial tillering	N0	3	L3	412	406	411	419	426	436	447	455	463	471	481	491	499	508	519	526	533	542	547	556	563	572	574	581	587	589	594	598	604	609	637	656	662	670	676	680	684	686	689	691	695	694	695	697	701	701
Initial tillering	N0	4	L1	565	560	571	585	593	605	617	629	641	653	663	673	679	691	701	708	718	725	730	739	746	750	757	763	768	774	778	783	785	788	814	831	844	854	860	869	873	877	878	881	885	888	894	892	894	897
Initial tillering	N0	4	L2	438	429	436	442	449	459	465	472	479	484	492	497	501	512	515	525	527	532	537	542	545	550	555	560	565	570	569	572	574	578	598	614	624	629	635	640	643	644	646	649	651	654	653	655	656	658
Initial tillering	N0	4	L3	438	429	434	440	447	452	459	468	471	478	484	487	492	502	502	509	514	518	521	523	527	530	534	541	541	544	547	548	549	550	567	580	585	582	588	588	591	590	590	589	593	592	594	591	586	589
Initial tillering	N0	5	L1	427	423	428	437	447	455	464	473	480	488	496	503	512	523	529	538	544	550	557	564	571	577	580	588	594	599	604	609	613	618	655	679	697	713	724	735	743	752	757	762	768	771	773	780	781	783
Initial tillering	N0	5	L2	524	516	527	538	546	560	572	582	592	602	606	620	629	636	644	652	660	662	671	674	682	685	692	698	702	705	708	709	714	718	737	754	765	770	773	778	782	784	784	785	788	790	789	787	789	789
Initial tillering	N0	5	L3	390	384	389	395	401	408	411	421	427	433	440	446	452	458	464	469	470	481	485	491	496	500	502	507	510	515	520	522	527	528	549	562	571	577	582	583	584	586	587	589	589	589	590	589	590	588
Initial tillering	N0	6	L1	527	522	536	549	560	573	586	600	613	626	638	650	661	672	684	694	705	717	723	732	741	748	757	763	772	779	783	792	796	802	848	881	907	926	940	954	964	978	983	987	993	998	1000	1003	1005	1008
Initial tillering	N0	6	L2	487	474	483	492	503	508	519	525	533	541	548	557	564	572	581	584	591	596	602	609	614	620	624	626	633	635	640	643	649	650	678	694	707	719	727	732	737	742	748	752	756	759	761	762	770	767
Initial tillering	N0	6	L3	421	413	420	426	435	442	449	457	465	472	477	484	490	495	501	509	514	520	525	527	533	536	542	544	548	553	554	553	561	564	581	592	598	603	603	605	608	609	608	606	608	608	608	606	605	604
Initial tillering	N1	1	L1	518	512	526	537	550	563	576	589	603	613	626	636	646	658	669	680	687	695	703	711	721	727	736	741	747	752	759	763	770	775	817	845	867	885	897	909	920	925	932	938	943	944	945	949	951	953
Initial tillering	N1	1	L2	378	373	379	385	393	399	405	411	416	424	430	440	446	452	456	462	468	475	482	488	496	498	503	509	512	518	522	529	532	536	568	588	606	619	629	638	643	651	656	662	665	667	671	674	675	676
Initial tillering	N1	1	L3	325	316	321	325	330	333	337	343	350	353	360	363	371	375	379	387	392	396	405	407	412	419	424	430	435	440	446	446	456	461	506	547	580	606	628	648	662	677	690	701	705	715	723	729	734	738
Initial tillering	N1	2	L1	411	406	413	422	425	438	446	455	464	473	481	489	498	507	516	526	534	542	548	555	562	571	578	584	594	596	603	609	614	618	660	695	717	737	749	762	777	784	792	797	803	809	813	815	820	822
Initial tillering	N1	2	L2	445	438	445	451	461	465	471	478	486	491	498	507	513	518	523	528	532	539	544	548	555	556	560	562	567	571	575	580	583	584	608	622	634	645	654	653	662	670	673	677	678	678	682	685	684	684
Initial tillering	N1	2	L3	288	280	282	284	287	290	292	297	297	301	304	307	311	313	317	318	322	326	328	331	336	338	340	343	344	348	349	352	355	358	381	402	417	432	446	457	466	472	478	484	489	493	496	500	503	505
Initial tillering	N1	3	L1	357	352	357	364	370	377	381	391	398	403	411	418	427	435	441	450	457	467	475	482	491	496	506	514	522	530	537	543	550	557	614	663	700	730	754	773	793	809	820	831	839	848	857	861	865	869
Initial tillering	N1	3	L2	381	375	385	391	398	406	412	420	427	433	441	444	457	463	468	475	482	489	493	500	505	512	515	519	524	528	533	537	541	543	572	590	603	614	623	630	636	640	645	648	652	653	656	659	661	662
Initial tillering	N1	3	L3	390	384	392	397	404	410	415	424	429	435	443	450	456	461	469	474	478	487	492	499	504	509	515	519	524	529	535	538	543	545	578	599	617	630	642	649	656	661	669	673	676	679	681	685	689	689
Initial tillering	N1	4	L1	430	427	439	452	467	480	494	509	521	535	550	565	579	593	608	621	633	646	657	669	681	697	705	715	725	732	742	751	761	770	837	884	916	942	963	983	994	1003	1011	1019	1027	1029	1031	1035	1040	1040
Initial tillering	N1	4	L2	514	505	516	524	537	546	557	567	577	589	596	602	610	620	630	638	646	651	657	665	669	675	682	688	692	697	701	705	708	715	749	775	793	808	818	831	841	849	855	865	870	873	878	880	880	885
Initial tillering	N1	4	L3	415	411	418	427	435	443	448	457	466	474	482	490	499	503	510	519	525	532	539	545	550	556	562	568	572	578	584	587	593	596	630	654	672	688	701	708	717	725	733	738	741	744	749	751	752	757
Initial tillering	N1	5	L1	483	481	491	501	512	524	537	548	561	576	589	599	610	624	633	643	657	667	678	688	697	705	712	723	735	743	749	754	764	770	825	869	901	927	942	959	974	983	992	999	1009	1010	1013	1018	1018	1022
Initial tillering	N1	5	L2	414	407	413	420	430	436	444	453	461	469	478	485	492	498	509	517	526	533	538	545	552	559	565	576	579	586	590	596	602	608	657	692	723	747	768	785	800	813	825	833	842	849	854	859	865	869
Initial tillering	N1	5	L3	515	504	513	524	532	541	549	557	569	574	582	589	596	603	611	617	626	631	638	642	649	653	659	665	672	676	682	683	691	694	732	764	790	811	829	843	857	868	877	885	892	903	904	905	907	917
Initial tillering	N1	6	L1	487	488	501	516	531	548	562	579	594	609	626	642	656	670	684	694	710	725	737	750	761	769	780	789	798	809	818	825	834	842	897	938	967	990	1003	1016	1029	1039	1047	1050	1056	1060	1067	1066	1069	1070
Initial tillering	N1	6	L2	530	520	529	540	550	558	568	580	584	593	603	612	620	627	636	640	646	654	662	668	676	681	689	691	695	700	707	711	715	720	752	774	788	801	811	818	825	831	835	840	840	841	844	846	849	848
Initial tillering	N1	6	L3	563	553	564	572	587	599	611	622	632	642	650	660	669	677	686	693	701	706	712	718	725	730	736	740	748	748	753	757	762	765	794	815	831	842	854	866	873	877	882	892	892	897	898	904	906	906
Initial tillering	N2	1	L1	445	440	449	458	469	480	490	501	513	520	530	540	551	560	569	579	587	594	604	612	620	627	637	644	648	654	657	668	674	679	722	753	778	797	808	826	834	842	851	859	863	865	870	874	877	877
Initial tillering	N2	1	L2	344	339	345	345	357	361	368	373	379	385	391	396	398	410	414	421	425	431	435	442	448	452	459	462	466	471	475	480	485	490	523	549	572	589	605	617	628	636	645	653	660	663	669	674	678	683
Initial tillering	N2	1	L3	379	377	382	387	393	400	405	412	419	425	431	440	445	451	457	462	469	475	481	486	495	498	505	510	515	522	527	530	536	539	576	605	630	650	665	674	687	698	705	710	715	720	726	727	729	730
Initial tillering	N2	2	L1	425	415	422	429	440	449	453	462	470	476	485	492	501	508	514	522	529	535	541	549	556	562	567	572	575	581	587	591	597	597	640	667	683	701	717	728	739	747	755	762	768	773	776	782	785	786
Initial tillering	N2	2	L2	470	466	473	483	493	501	509	519	528	538	549	557	565	573	582	589	598	609	617	625	632	638	646	655	661	667	674	681	687	692	742	781	813	838	859	873	888	901	911	918	924	932	937	941	943	946
Initial tillering	N2	2	L3	339	334	335	346	349	357	360	368	374	380	386	392	399	403	410	414	421	427	434	439	444	448	455	459	465	471	473	479	483	487	522	552	573	590	608	619	629	642	649	655	663	668	673	677	680	686
Initial tillering	N2	3	L1	405	398	405	412	422	426	436	445	454	461	469	480	482	492	499	507	514	522	529	534	539	546	553	559	564	569	574	578	583	587	626	655	679	694	709	727	737	745	753	760	767	770	776	778	780	787
Initial tillering	N2	3	L2	392	384	389	396	402	407	413	422	430	436	443	449	454	461	468	475	483	485	492	497	502	507	515	520	525	532	532	537	542	547	581	608	631	653	661	675	688	696	705	713	719	725	729	732	738	745
Initial tillering	N2	3	L3	376	372	375	382	387	395	399	406	414	421	428	433	440	446	452	457	466	472	478	484	489	493	499	506	510	520	521	526	531	535	573	601	626	648	660	671	681	692	698	703	709	716	721	721	725	728
Initial tillering	N2	4	L1	354	349	354	360	364	372	379	385	390	397	403	410	416	425	434	435	441	448	454	460	466	472	479	478	488	493	497	502	509	513	549	580	602	621	638	653	664	673	684	694	701	705	710	717	721	724
Initial tillering	N2	4	L2	361	353	358	363	368	374	382	392	392	399	406	413	419	426	433	439	446	454	460	467	475	481	488	496	501	503	510	519	527	532	585	627	659	687	711	733	746	761	773	784	793	797	804	812	817	818
Initial tillering	N2	4	L3	302	296	296	302	305	309	308	316	320	323	329	333	336	339	342	346	351	356	359	366	365	374	376	379	384	388	391	397	398	402	435	461	484	508	524	532	550	560	571	580	586	592	599	605	609	613
Initial tillering	N2	5	L1	394	385	393	397	408	416	425	433	440	448	456	464	473	481	488	495	502	507	512	522	528	534	541	545	550	556	561	566	570	576	614	641	661	680	696	710	718	726	734	740	745	755	757	761	764	765
Initial tillering	N2	5	L2	337	328	337	336	342	346	351	356	361	365	370	370	379	384	391	393	399	404	408	412	413	422	426	431	434	441	442	445	450	456	488	520	547	562	580	596	608	621	628	637	646	653	657	661	667	670
Initial tillering	N2	5	L3	335	327	331	340	341	346	350	355	361	365	371	377	381	387	393	398	403	408	416	421	427	429	439	442	447	453	459	463	468	473	515	550	578	603	621	643	655	667	679	690	698	704	712	719	722	725
Initial tillering	N2	6	L1	356	350	357	367	375	385	396	404	416	425	436	447	457	471	482	492	502	513	524	535	548	557	570	575	585	595	603	613	624	630	702	753	793	825	849	869	883	896	909	917	924	927	933	941	940	940
Initial tillering	N2	6	L2	418	412	421	427	434	442	451	455	464	471	479	487	492	500	506	511	518	525	531	536	543	549	554	558	563	567	573	579	584	589	626	655	679	699	718	733	744	757	765	775	784	789	794	798	803	808
Initial tillering	N2	6	L3	320	312	317	316	328	331	335	341	346	352	358	365	368	374	381	387	393	400	403	409	416	420	426	433	438	442	448	451	457	461	503	537	564	586	604	620	632	648	658	664	674	680	687	692	695	702
Growth stage	Nitrogen level	Sample No.	Leaf position	1e-05	2e-05	3e-05	4e-05	5e-05	6e-05	7e-05	8e-05	9e-05	0.0001	0.00011	0.00012	0.00013	0.00014	0.00015	0.00016	0.00017	0.00018	0.00019	0.0002	0.00021	0.00022	0.00023	0.00024	0.00025	0.00026	0.00027	0.00028	0.00029	0.0003	0.0004	0.0005	0.0006	0.0007	0.0008	0.0009	0.001	0.0011	0.0012	0.0013	0.0014	0.0015	0.0016	0.0017	0.0018	0.0019
Tillering	N0	1	L1	338	336	337	342	348	353	358	364	370	377	386	391	398	405	411	418	424	434	440	446	454	463	469	477	484	495	498	507	513	519	575	957	658	689	712	732	1052	764	774	784	793	801	806	810	818	822
Tillering	N0	1	L2	293	289	294	298	302	310	313	317	322	327	332	337	342	347	355	359	365	369	374	381	386	392	397	397	408	412	418	421	428	431	476	506	533	553	573	587	598	606	617	627	631	637	641	649	651	654
Tillering	N0	1	L3	328	326	330	333	339	345	349	356	363	369	375	380	385	394	400	407	414	420	426	434	441	448	456	461	469	475	482	488	493	502	558	600	633	661	686	707	725	736	749	762	769	776	783	793	795	799
Tillering	N0	2	L1	317	312	316	318	327	333	338	345	350	360	364	370	376	382	390	397	404	411	421	424	432	438	445	453	460	466	473	478	486	492	547	592	626	654	675	695	712	727	736	745	755	763	768	772	779	782
Tillering	N0	2	L2	532	526	531	535	540	547	552	556	561	567	570	573	576	581	586	589	591	594	593	598	599	603	606	607	609	609	611	611	614	615	626	628	629	633	631	631	630	628	632	629	627	626	627	626	625	625
Tillering	N0	2	L3	356	350	354	361	368	373	380	386	393	403	407	414	421	429	437	446	453	461	467	474	485	493	500	508	520	524	531	538	547	553	614	667	707	737	763	787	803	818	830	840	852	857	862	868	876	880
Tillering	N0	3	L1	479	472	481	487	496	504	512	523	529	537	545	551	557	566	573	581	588	594	600	605	611	617	626	629	636	642	645	649	651	658	691	718	737	748	760	773	780	785	796	800	808	810	812	816	819	823
Tillering	N0	3	L2	437	428	441	447	456	464	468	480	486	494	503	510	521	525	531	538	544	549	556	563	568	568	578	581	584	589	593	597	601	605	630	649	661	671	680	686	691	698	705	707	709	713	717	719	720	722
Tillering	N0	3	L3	667	664	680	693	710	725	740	757	769	787	803	817	832	845	860	873	885	900	912	926	938	947	957	968	979	989	998	1005	1016	1024	1086	1130	1162	1182	1198	1210	1223	1232	1235	1242	1249	1250	1253	1254	1258	1258
Tillering	N0	4	L1	304	302	305	308	313	316	321	324	330	333	339	343	348	352	356	362	367	371	376	383	387	390	396	401	408	411	416	422	425	425	471	508	537	561	584	599	616	628	638	647	658	665	671	676	682	689
Tillering	N0	4	L2	389	388	394	402	410	419	428	438	448	457	460	474	483	491	501	510	519	526	535	543	554	556	565	573	580	587	592	598	605	610	657	693	719	738	757	778	791	801	810	823	830	836	841	846	852	856
Tillering	N0	4	L3	501	493	502	507	517	522	533	536	543	548	553	558	565	569	577	577	586	589	594	597	601	605	609	610	612	617	619	621	627	629	646	653	660	663	665	667	666	667	667	668	666	666	666	667	666	662
Tillering	N0	5	L1	340	333	339	342	348	354	361	367	371	377	383	388	395	403	409	415	421	426	434	440	449	454	462	467	472	478	483	490	498	503	553	593	624	649	673	688	702	715	727	737	741	749	755	763	765	768
Tillering	N0	5	L2	448	441	448	456	460	465	473	481	487	494	503	506	512	518	521	529	534	539	545	549	551	555	561	565	569	574	576	578	579	582	607	621	633	639	644	647	653	658	659	659	666	668	672	671	672	675
Tillering	N0	5	L3	448	441	453	462	469	478	487	497	508	519	528	543	548	560	570	581	590	602	612	621	630	641	648	658	666	676	685	691	699	704	769	815	853	885	907	929	942	965	976	985	998	1005	1012	1015	1022	1027
Tillering	N0	6	L1	382	377	384	389	393	400	404	406	415	422	428	434	438	446	451	458	464	469	478	482	487	493	499	503	509	515	522	524	532	534	579	615	643	668	689	705	720	733	744	753	761	769	778	783	787	791
Tillering	N0	6	L2	524	515	524	536	541	549	555	565	573	580	588	594	597	608	611	618	623	629	636	639	641	643	650	655	659	663	665	671	668	671	688	699	708	712	712	715	718	721	719	720	723	721	721	720	721	721
Tillering	N0	6	L3	539	531	541	551	561	568	579	585	597	600	611	618	626	633	641	647	651	657	659	670	673	678	682	686	689	692	695	695	702	705	725	736	740	744	747	749	750	750	752	752	751	751	751	753	750	749
Tillering	N1	1	L1	478	469	477	484	490	497	505	512	520	524	533	537	542	551	555	562	569	572	577	584	589	594	600	604	611	615	617	622	626	633	666	695	717	734	751	768	777	784	793	801	810	813	816	825	827	830
Tillering	N1	1	L2	439	433	441	450	459	465	474	481	491	500	508	518	526	532	543	550	559	568	575	583	590	597	605	612	617	626	632	636	643	649	699	735	766	792	812	830	846	859	873	880	889	896	901	907	913	919
Tillering	N1	1	L3	478	475	487	502	514	527	542	556	570	581	597	611	625	638	654	664	681	691	703	714	727	738	749	760	766	777	788	796	807	814	880	929	961	991	1009	1030	1043	1051	1062	1069	1073	1078	1080	1083	1083	1084
Tillering	N1	2	L1	310	303	306	311	315	321	326	329	334	339	345	350	356	362	367	372	379	385	390	395	404	408	414	420	425	432	439	444	451	455	502	543	580	606	630	650	664	676	688	698	706	707	717	724	730	732
Tillering	N1	2	L2	353	348	354	357	364	370	375	383	388	394	402	409	417	424	430	437	444	452	460	468	472	483	487	495	501	509	516	523	530	535	590	635	672	702	728	749	768	787	801	811	821	831	841	846	851	862
Tillering	N1	2	L3	476	470	478	487	497	505	515	520	530	538	547	555	563	572	578	584	589	595	602	609	615	620	626	628	634	639	645	649	652	656	685	707	726	741	751	762	770	777	786	791	796	801	808	813	814	817
Tillering	N1	3	L1	355	351	356	362	366	373	378	383	389	394	401	407	412	420	425	427	437	444	449	455	462	468	473	478	483	489	496	501	505	512	555	589	615	638	659	673	686	697	707	717	723	730	735	739	744	748
Tillering	N1	3	L2	412	406	413	422	429	440	448	459	467	476	485	496	507	519	528	538	550	558	569	580	590	599	610	621	630	637	646	654	664	674	746	803	846	882	912	937	961	976	991	1006	1014	1023	1030	1036	1044	1045
Tillering	N1	3	L3	387	381	387	391	397	402	404	411	417	425	431	436	444	448	455	459	468	474	480	485	491	496	502	508	515	521	526	531	537	542	589	627	660	686	707	724	740	753	764	773	782	790	796	803	807	810
Tillering	N1	4	L1	496	490	497	503	512	519	525	531	538	544	547	553	559	565	572	575	580	582	587	593	597	601	604	610	611	613	616	619	622	626	644	658	669	676	682	689	691	695	699	701	703	702	705	706	707	708
Tillering	N1	4	L2	439	434	439	449	455	465	467	479	486	492	497	503	509	515	520	527	532	536	539	544	547	552	555	559	561	562	566	567	569	573	584	589	593	593	591	592	592	590	590	588	588	587	589	587	585	584
Tillering	N1	4	L3	516	512	526	539	552	565	577	590	605	616	627	639	650	662	673	683	688	702	708	717	725	734	742	748	755	761	769	773	779	786	826	854	873	890	901	913	917	924	930	935	939	940	943	945	942	947
Tillering	N1	5	L1	512	505	512	519	527	532	542	549	555	563	569	572	579	584	589	594	601	605	607	612	615	618	622	626	628	631	633	633	636	635	649	658	658	657	657	654	653	652	648	649	646	645	644	643	642	641
Tillering	N1	5	L2	402	396	404	412	419	426	433	442	448	455	462	471	479	482	490	495	501	508	513	516	524	524	533	535	539	543	547	551	553	556	581	593	609	620	624	629	638	644	647	651	654	658	661	661	664	666
Tillering	N1	5	L3	625	622	633	646	656	667	676	686	694	702	715	720	727	734	738	744	750	756	760	765	767	773	774	779	782	784	787	789	791	794	806	810	813	815	813	812	813	811	810	809	806	805	804	803	800	796
Tillering	N1	6	L1	352	349	356	360	368	373	379	385	393	398	401	408	414	421	425	431	436	440	445	450	454	459	461	465	469	471	473	481	480	483	502	513	520	522	524	526	529	522	527	528	528	529	529	528	529	529
Tillering	N1	6	L2	567	557	566	575	582	590	597	604	612	618	620	628	634	641	647	651	656	662	664	668	672	675	679	683	684	685	689	692	695	697	714	724	730	734	739	742	743	743	744	745	746	745	741	747	745	745
Tillering	N1	6	L3	488	484	497	505	516	528	538	549	562	571	580	590	600	609	619	626	633	643	651	654	662	668	673	680	684	691	691	697	700	703	728	739	751	753	756	759	760	761	761	762	765	763	761	760	761	760
Tillering	N2	1	L1	431	425	434	441	448	455	460	469	477	484	491	499	503	510	516	522	529	535	540	545	550	553	560	566	569	574	578	582	584	591	619	640	657	672	684	691	699	708	712	716	720	724	729	728	732	733
Tillering	N2	1	L2	494	486	499	504	514	521	529	537	545	551	559	567	573	578	583	587	593	598	603	608	612	614	617	621	623	628	630	632	635	636	652	664	668	673	675	675	676	680	678	680	678	680	680	677	676	675
Tillering	N2	1	L3	407	404	411	420	427	436	444	455	466	474	483	492	502	514	525	532	541	549	561	570	579	588	595	601	610	618	624	631	639	647	700	739	770	797	816	830	843	855	865	871	880	886	892	897	903	903
Tillering	N2	2	L1	457	451	457	467	477	482	491	500	505	512	519	526	533	539	546	549	554	560	564	567	573	576	579	582	584	588	592	592	595	598	610	616	619	619	621	622	621	621	623	622	621	622	621	621	620	619
Tillering	N2	2	L2	535	528	538	548	558	569	577	588	595	604	612	619	627	633	642	646	653	658	665	667	672	679	682	685	689	692	693	699	702	703	721	730	736	737	739	743	743	740	741	743	744	743	740	740	741	739
Tillering	N2	2	L3	664	655	666	676	686	693	706	715	722	730	737	743	750	757	762	767	771	776	780	784	790	792	794	795	798	800	802	803	806	807	816	814	810	809	808	805	802	800	797	797	793	790	788	789	787	779
Tillering	N2	3	L1	419	414	422	431	438	445	454	462	471	479	487	493	501	510	518	526	535	543	548	555	561	564	576	581	586	593	598	602	608	613	651	683	705	719	732	744	754	762	768	773	780	787	788	790	794	799
Tillering	N2	3	L2	563	558	570	579	589	598	607	616	625	633	642	650	656	662	669	674	680	685	690	696	698	699	707	709	714	716	721	723	726	726	743	750	756	758	765	763	765	768	769	767	769	769	771	769	768	769
Tillering	N2	3	L3	438	431	440	448	456	464	472	480	487	493	501	512	520	522	535	539	544	551	555	562	568	573	574	580	585	589	593	596	600	603	622	631	635	639	642	639	643	641	642	640	639	638	638	636	637	635
Tillering	N2	4	L1	569	561	571	575	584	589	596	604	608	616	622	625	630	634	638	643	648	651	656	657	660	661	664	667	668	672	674	676	675	677	689	695	700	702	702	702	703	705	705	702	700	698	703	698	697	698
Tillering	N2	4	L2	424	416	431	440	451	460	471	483	494	505	512	529	539	550	563	572	584	592	601	608	622	630	639	647	654	662	669	675	678	692	744	783	814	836	857	873	888	902	909	918	926	931	934	941	943	949
Tillering	N2	4	L3	300	296	301	304	305	313	315	321	324	328	333	338	343	348	353	355	361	366	371	377	381	386	389	394	401	405	410	416	419	424	466	502	533	558	581	598	612	627	640	647	657	664	669	678	680	684
Tillering	N2	5	L1	349	344	349	355	361	368	373	379	385	392	399	405	411	420	425	432	437	443	450	456	462	465	475	479	485	490	494	503	507	512	551	580	606	624	645	656	667	680	691	699	705	714	723	728	733	738
Tillering	N2	5	L2	491	481	490	500	508	516	525	532	540	551	559	567	575	583	590	597	605	612	621	626	631	635	642	648	653	659	665	669	673	676	711	734	756	770	779	788	798	805	811	814	816	825	827	830	831	832
Tillering	N2	5	L3	137	135	137	138	138	140	141	141	141	145	145	145	146	148	149	149	150	151	152	153	153	154	153	156	156	157	159	154	161	160	166	169	173	175	177	179	181	181	184	185	184	185	187	187	187	186
Tillering	N2	6	L1	577	573	585	598	607	617	631	643	653	665	672	684	693	700	709	718	723	732	740	741	751	755	762	767	771	776	780	783	785	788	819	833	846	855	862	868	877	883	886	890	895	897	899	900	900	906
Growth stage	Nitrogen level	Sample No.	Leaf position	1e-05	2e-05	3e-05	4e-05	5e-05	6e-05	7e-05	8e-05	9e-05	0.0001	0.00011	0.00012	0.00013	0.00014	0.00015	0.00016	0.00017	0.00018	0.00019	0.0002	0.00021	0.00022	0.00023	0.00024	0.00025	0.00026	0.00027	0.00028	0.00029	0.0003	0.0004	0.0005	0.0006	0.0007	0.0008	0.0009	0.001	0.0011	0.0012	0.0013	0.0014	0.0015	0.0016	0.0017	0.0018	0.0019
Jointing	N0	1	L1	421	411	420	422	426	430	435	438	443	445	450	456	457	462	468	472	475	472	484	487	491	496	498	504	507	509	513	516	521	525	555	580	599	617	631	643	651	659	666	673	676	681	685	691	694	697
Jointing	N0	1	L2	557	553	557	562	565	572	578	581	587	592	598	599	607	613	618	624	633	631	638	642	649	653	658	663	666	669	673	680	684	689	725	752	773	797	810	821	824	839	849	852	857	866	871	876	877	882
Jointing	N0	1	L3	477	472	477	479	488	493	499	504	512	517	522	528	533	542	546	552	557	563	569	573	579	587	591	597	601	607	611	616	622	627	665	693	716	732	747	758	764	772	778	787	786	791	794	799	801	801
Jointing	N0	1	L4	537	530	538	544	557	561	567	575	583	589	598	606	613	617	624	629	638	643	649	655	660	664	669	673	678	683	687	689	691	696	714	737	744	751	755	760	765	768	771	774	775	778	780	781	787	787
Jointing	N0	2	L1	479	475	480	485	487	493	496	500	506	510	517	522	523	531	534	539	546	549	554	557	562	565	570	574	580	585	588	591	596	598	631	659	682	701	713	725	738	749	755	761	767	770	775	779	783	788
Jointing	N0	2	L2	1003	994	997	998	1003	1009	1009	1013	1016	1013	1019	1024	1028	1030	1034	1034	1038	1041	1043	1045	1050	1052	1055	1058	1057	1064	1065	1067	1072	1074	1095	1112	1126	1142	1152	1158	1165	1172	1182	1183	1184	1188	1195	1196	1196	1196
Jointing	N0	2	L3	624	619	625	635	640	646	654	661	669	677	684	690	698	703	708	714	722	727	735	738	742	747	758	759	765	769	772	776	780	784	817	841	858	874	885	896	904	910	917	923	931	932	936	940	944	946
Jointing	N0	2	L4
Jointing	N0	3	L1	545	540	543	548	553	558	561	566	570	573	579	585	587	594	597	602	603	608	612	616	622	622	630	631	634	637	642	645	648	650	674	694	711	724	734	743	751	761	765	771	774	778	788	789	792	799
Jointing	N0	3	L2	589	581	586	590	594	602	603	608	611	616	620	624	628	633	635	640	642	647	650	653	657	661	664	668	671	673	677	680	683	686	709	726	741	755	765	773	779	790	793	797	803	810	815	817	821	825
Jointing	N0	3	L3
Jointing	N0	3	L4	627	620	628	635	647	653	666	674	682	690	697	707	713	722	729	737	740	749	751	756	760	765	770	774	775	778	782	784	787	793	804	810	813	812	812	811	808	810	808	810	807	807	806	806	808	806
Jointing	N0	4	L1	431	426	428	435	438	442	445	449	456	457	461	466	469	472	478	481	485	490	493	496	501	505	507	512	515	517	523	526	525	531	560	584	606	625	640	651	661	669	678	684	689	696	701	705	707	710
Jointing	N0	4	L2	517	510	518	521	521	532	537	543	548	555	559	564	571	572	582	588	596	601	607	612	621	624	630	636	642	648	656	659	663	669	715	756	787	805	827	845	861	873	879	888	896	901	906	911	915	919
Jointing	N0	4	L3
Jointing	N0	4	L4	709	706	713	721	728	732	746	755	766	773	784	792	801	811	821	832	842	852	860	871	880	890	899	910	918	927	932	943	952	960	1027	1078	1118	1149	1177	1196	1213	1228	1239	1250	1256	1261	1270	1275	1280	1282
Jointing	N0	5	L1	438	430	435	439	444	450	456	459	465	469	474	479	484	489	495	498	505	509	513	520	525	531	534	540	543	546	552	556	562	565	601	630	651	669	684	696	704	712	721	727	731	736	741	747	750	752
Jointing	N0	5	L2
Jointing	N0	5	L3	492	483	489	493	497	503	506	512	516	518	521	526	533	535	539	543	547	548	554	556	559	563	566	569	570	573	574	579	579	581	596	601	605	605	606	606	604	606	606	604	603	605	603	604	603	601
Jointing	N0	5	L4	550	544	550	554	561	570	573	581	587	591	598	604	609	613	620	625	631	635	640	637	645	650	656	659	661	662	668	670	670	674	691	698	703	702	702	704	704	703	700	701	700	699	699	698	699	696
Jointing	N0	6	L1	407	399	403	407	411	416	416	422	426	430	434	440	443	447	449	454	457	462	466	471	473	477	481	485	489	493	495	501	502	506	534	556	576	593	604	613	622	629	636	642	647	653	656	662	663	667
Jointing	N0	6	L2	503	496	498	501	503	506	507	511	512	513	517	519	521	522	525	528	526	532	534	537	539	540	542	543	548	550	553	553	555	556	576	592	605	621	631	641	652	658	665	670	675	679	683	688	690	693
Jointing	N0	6	L3	490	482	491	493	496	500	504	509	515	521	522	531	534	539	544	550	555	561	565	571	575	577	586	589	597	600	606	611	617	621	666	705	738	764	787	807	827	839	851	861	871	881	886	891	896	903
Jointing	N0	6	L4	489	484	487	493	496	500	504	509	515	521	526	530	535	540	545	551	555	560	564	573	575	579	583	591	593	600	603	610	611	618	655	686	710	728	743	757	768	777	784	789	797	801	806	810	812	818
Jointing	N1	1	L1	424	419	421	425	428	433	436	440	445	449	454	457	462	464	470	474	478	481	487	489	493	498	502	507	508	516	517	520	524	530	557	584	605	621	636	649	662	673	682	690	698	704	710	717	722	729
Jointing	N1	1	L2	489	485	487	492	495	499	505	507	514	518	525	528	532	538	542	547	554	555	562	564	569	573	577	583	588	593	595	600	603	608	644	673	701	720	736	750	768	778	786	793	803	812	818	819	827	833
Jointing	N1	1	L3	432	428	433	437	443	447	452	458	462	470	475	480	487	492	497	505	510	515	522	527	531	538	543	546	554	559	563	567	572	577	616	647	673	693	707	721	735	744	750	760	768	772	777	782	785	795
Jointing	N1	1	L4	550	538	551	556	563	567	573	580	586	592	600	608	612	620	624	631	636	644	650	657	664	667	675	681	684	691	697	700	707	710	750	780	803	823	839	852	863	872	879	884	891	898	901	906	909	912
Jointing	N1	2	L1	430	424	429	430	434	434	441	446	449	451	455	458	461	465	469	474	475	480	482	487	489	493	497	500	502	505	512	514	517	520	550	573	592	616	633	646	656	667	675	684	689	697	702	708	711	716
Jointing	N1	2	L2	402	394	398	400	405	407	411	414	419	419	426	427	432	435	436	439	442	442	450	452	455	458	459	463	466	468	471	475	478	478	502	518	532	546	557	567	574	583	591	596	602	606	608	620	623	626
Jointing	N1	2	L3
Jointing	N1	2	L4	561	556	561	569	575	582	588	595	602	610	617	626	634	640	647	653	661	668	675	683	689	696	699	709	716	721	729	734	742	745	791	828	858	881	900	914	929	940	952	960	966	974	985	988	991	997
Jointing	N1	3	L1	403	395	401	405	410	413	416	419	424	428	434	441	442	447	450	454	459	463	468	472	474	479	485	489	495	498	503	504	508	512	544	570	591	608	623	632	643	647	657	663	670	673	677	677	682	687
Jointing	N1	3	L2	457	449	454	458	462	468	473	477	480	484	489	494	497	501	504	508	515	518	521	526	528	532	536	539	541	546	548	548	551	555	577	590	604	613	618	624	632	637	642	642	646	653	651	654	657	660
Jointing	N1	3	L3	451	444	448	453	456	459	461	469	469	473	476	480	485	490	494	497	496	505	510	515	518	522	526	530	534	538	544	548	550	554	592	625	650	670	688	710	721	732	745	752	757	765	770	776	780	782
Jointing	N1	3	L4	534	529	538	542	550	555	563	570	576	583	590	596	608	612	618	624	628	636	640	646	651	658	660	664	667	671	675	677	682	685	704	714	719	722	724	723	724	724	725	724	724	723	723	723	722	721
Jointing	N1	4	L1	547	541	544	549	556	561	565	570	577	578	585	591	594	598	604	608	613	615	620	623	627	631	633	638	639	643	646	651	653	656	678	696	709	721	729	737	744	747	751	755	756	758	761	765	763	766
Jointing	N1	4	L2	751	742	748	752	759	761	769	773	778	784	791	795	797	806	809	816	821	825	830	833	838	843	845	850	855	861	863	867	870	872	897	915	929	936	941	945	949	952	953	952	954	956	955	956	956	959
Jointing	N1	4	L3	937	933	938	946	946	956	960	967	973	979	984	990	994	999	1006	1013	1018	1024	1030	1032	1041	1044	1050	1052	1058	1061	1066	1070	1074	1077	1107	1128	1145	1156	1163	1168	1173	1177	1180	1182	1184	1187	1188	1187	1188	1192
Jointing	N1	4	L4	579	571	576	579	583	588	594	598	603	609	612	621	620	627	633	637	642	648	652	656	663	666	672	675	680	683	689	693	695	698	734	761	780	793	812	820	830	835	840	845	849	853	855	857	862	863
Jointing	N1	5	L1	489	482	489	498	506	515	523	533	536	544	551	558	564	571	576	584	585	594	598	604	608	614	616	621	623	626	629	633	636	640	656	665	668	671	675	676	675	677	677	676	675	674	674	675	674	672
Jointing	N1	5	L2	769	765	768	772	776	780	783	788	791	795	799	804	808	812	816	822	824	830	832	838	843	844	855	854	860	865	870	874	878	884	925	960	990	1018	1042	1060	1079	1091	1103	1115	1120	1131	1137	1144	1148	1153
Jointing	N1	5	L3	448	441	449	455	463	467	476	481	487	494	501	506	512	518	521	528	534	538	544	549	553	556	561	562	568	571	574	577	580	579	602	615	624	630	632	634	636	640	638	638	637	637	640	637	635	635
Jointing	N1	5	L4	498	488	496	504	512	520	526	533	545	548	556	560	567	571	578	582	586	597	597	601	605	609	608	616	617	621	623	627	628	629	643	650	657	657	658	656	656	656	654	651	649	649	648	645	643	644
Jointing	N1	6	L1	470	464	474	480	488	496	504	513	519	528	534	538	548	556	562	568	576	583	585	590	598	600	606	611	615	618	621	624	629	632	653	668	672	682	689	694	699	701	705	707	712	713	716	714	721	721
Jointing	N1	6	L2	562	554	564	573	582	592	601	608	619	626	634	640	650	656	664	670	677	678	686	691	697	703	707	711	714	718	720	725	730	734	760	779	794	803	814	823	830	837	839	845	849	851	853	854	858	862
Jointing	N1	6	L3	555	543	550	557	564	568	575	578	584	588	593	597	602	605	607	612	614	616	621	624	625	627	628	630	628	634	636	639	638	641	647	649	650	651	652	651	649	649	649	648	645	645	644	645	642	641
Jointing	N1	6	L4	526	521	532	545	551	563	572	581	589	598	607	614	617	625	632	640	647	651	656	659	664	665	671	676	679	682	683	683	688	691	701	704	704	703	700	699	697	697	691	690	689	687	683	682	676	678
Jointing	N2	1	L1	349	343	349	356	361	368	373	380	387	394	401	408	416	423	423	436	442	449	457	463	468	476	481	487	495	500	505	510	516	522	566	600	628	651	666	681	693	704	712	719	729	730	737	740	744	747
Jointing	N2	1	L2	456	450	458	465	471	479	485	490	496	502	508	515	518	526	530	536	537	543	547	550	556	558	562	564	567	572	572	578	579	582	597	606	611	616	619	619	620	622	624	625	625	625	625	626	624	624
Jointing	N2	1	L3	587	576	579	589	597	601	605	609	614	619	624	628	633	635	639	641	644	647	650	652	657	657	659	661	663	666	668	669	672	671	684	689	692	691	699	697	697	698	698	698	697	696	693	697	693	693
Jointing	N2	1	L4	562	555	567	576	587	597	604	612	624	632	641	649	658	662	670	677	681	689	694	699	704	709	712	715	720	724	727	730	730	736	752	762	768	772	774	775	776	778	779	778	777	777	777	776	774	773
Jointing	N2	2	L1	439	431	442	449	458	466	475	483	493	499	508	518	526	534	541	549	555	565	570	577	585	589	597	601	607	613	619	625	631	633	671	703	725	743	760	770	782	792	800	808	811	817	823	826	827	830
Jointing	N2	2	L2	464	458	467	476	485	496	505	515	523	535	540	553	561	569	579	587	595	603	610	616	624	630	638	645	650	657	661	665	670	677	714	745	770	785	798	810	823	830	836	844	848	857	858	864	867	871
Jointing	N2	2	L3	500	491	499	508	519	527	537	544	553	559	566	577	579	588	594	600	605	608	613	618	620	627	631	634	637	641	642	646	649	651	667	675	678	677	686	686	684	685	685	687	686	685	684	686	685	684
Jointing	N2	2	L4	510	504	514	522	529	540	547	557	564	574	581	588	592	599	606	614	622	626	627	637	639	644	649	652	656	659	663	664	666	670	688	696	701	702	703	705	705	705	704	701	703	703	699	698	696	696
Jointing	N2	3	L1	441	431	442	449	459	467	475	484	493	497	507	518	523	531	537	544	551	558	564	570	574	578	584	588	592	598	600	604	611	610	640	658	674	685	695	704	711	718	721	727	733	738	740	745	746	748
Jointing	N2	3	L2	577	560	572	577	584	592	598	604	610	615	620	629	629	635	639	645	648	651	658	658	661	666	670	673	674	676	678	679	684	687	700	707	713	715	721	723	723	725	728	730	732	731	732	734	737	736
Jointing	N2	3	L3	501	494	502	512	517	525	531	538	545	551	557	562	571	574	580	582	587	592	594	599	603	601	609	611	612	614	617	618	621	621	629	632	630	628	630	628	624	624	622	623	621	619	619	619	615	616
Jointing	N2	3	L4	436	426	433	440	445	452	456	467	469	475	481	485	491	497	503	506	509	516	517	522	525	528	531	535	536	537	540	542	544	547	558	564	564	569	568	566	567	565	564	565	564	563	564	561	564	564
Jointing	N2	4	L1	515	505	510	518	526	532	536	545	552	556	563	568	570	577	581	586	591	595	599	602	605	608	613	614	616	621	621	624	627	629	645	659	665	672	672	677	680	682	684	684	687	690	690	688	689	690
Jointing	N2	4	L2	475	468	474	479	484	487	493	498	503	507	513	517	519	523	527	531	536	539	542	544	550	550	550	554	557	558	562	562	563	565	577	584	589	590	593	594	596	597	597	594	596	596	597	597	595	596
Jointing	N2	4	L3	431	422	427	432	435	441	445	450	454	456	462	465	468	473	475	479	481	484	486	489	493	495	499	500	504	504	507	507	509	509	519	524	527	528	527	529	524	531	527	528	527	527	526	526	525	524
Jointing	N2	4	L4	392	385	392	397	404	408	416	421	430	435	441	446	452	458	464	470	475	481	484	489	492	497	500	504	507	512	510	518	518	520	537	545	548	548	549	549	550	548	548	546	546	546	545	544	539	545
Jointing	N2	5	L1	472	464	473	483	491	498	507	516	522	529	536	542	548	553	561	568	572	577	580	587	586	594	599	604	608	610	614	616	619	623	646	666	682	693	704	713	722	726	733	738	745	748	752	755	759	761
Jointing	N2	5	L2	477	472	479	486	493	499	507	515	520	525	530	537	542	547	552	559	562	564	571	573	579	581	585	589	591	589	596	598	602	604	621	632	637	642	647	647	651	650	652	651	655	654	651	652	651	652
Jointing	N2	5	L3	323	319	325	330	336	339	340	349	355	359	364	368	375	377	381	384	390	394	397	401	405	410	411	415	416	421	425	426	428	430	450	462	480	493	500	505	512	518	522	524	523	531	533	535	535	536
Jointing	N2	5	L4	465	458	465	471	481	488	495	503	506	513	519	525	528	537	541	546	550	554	558	561	565	568	573	572	577	578	580	581	584	586	596	599	597	593	598	595	593	592	593	590	590	588	587	586	585	584
Jointing	N2	6	L1	431	425	431	436	444	450	454	461	466	472	476	481	487	491	496	501	504	506	512	516	519	523	525	525	532	533	536	539	541	543	557	572	580	584	590	595	599	601	603	606	609	612	611	613	614	616
Jointing	N2	6	L2	501	494	502	506	519	528	537	545	552	560	566	574	579	587	594	598	606	608	614	620	625	631	633	640	641	645	649	653	655	660	684	704	717	728	737	749	754	758	765	770	774	777	779	781	785	786
Jointing	N2	6	L3	593	586	590	594	595	598	601	604	607	610	612	614	616	617	620	624	626	625	632	631	632	633	635	637	637	640	640	642	640	644	648	652	653	652	654	653	654	654	653	651	652	654	653	653	653	653
Jointing	N2	6	L4	434	429	438	446	453	461	469	478	483	492	498	505	511	517	522	528	534	538	542	547	549	552	555	560	563	563	567	569	570	572	583	588	590	591	589	588	590	588	585	587	586	588	585	584	583	584
Growth stage	Nitrogen level	Sample No.	Leaf position	1e-05	2e-05	3e-05	4e-05	5e-05	6e-05	7e-05	8e-05	9e-05	0.0001	0.00011	0.00012	0.00013	0.00014	0.00015	0.00016	0.00017	0.00018	0.00019	0.0002	0.00021	0.00022	0.00023	0.00024	0.00025	0.00026	0.00027	0.00028	0.00029	0.0003	0.0004	0.0005	0.0006	0.0007	0.0008	0.0009	0.001	0.0011	0.0012	0.0013	0.0014	0.0015	0.0016	0.0017	0.0018	0.0019
Booting	N0	1	L1	247	238	241	245	248	251	254	259	265	269	275	279	286	289	294	300	308	315	315	321	327	333	338	344	349	355	365	365	370	376	422	460	491	515	536	554	570	584	592	602	611	617	625	629	631	636
Booting	N0	1	L2	322	313	321	328	334	341	348	358	362	371	378	386	394	404	413	422	436	439	449	458	467	477	487	497	504	519	521	532	541	550	619	682	722	758	788	812	834	846	862	874	884	891	900	905	912	913
Booting	N0	1	L3	289	286	292	296	301	309	311	318	325	329	338	344	349	355	364	369	376	383	389	396	404	408	415	423	429	435	441	448	453	459	509	549	581	605	626	642	657	668	678	687	695	700	705	709	714	715
Booting	N0	1	L4	267	263	267	272	275	280	285	290	293	302	304	309	312	320	326	331	337	343	345	354	360	365	371	379	381	388	393	397	405	411	458	496	527	553	575	586	603	615	625	633	637	643	648	650	651	658
Booting	N0	2	L1	302	295	302	307	314	323	327	333	339	348	354	363	372	381	388	396	405	415	424	430	443	451	459	467	475	485	494	502	508	521	586	641	686	721	752	775	795	814	831	841	851	862	870	873	878	889
Booting	N0	2	L2	337	326	333	339	347	353	360	365	372	381	389	395	403	412	421	431	437	446	455	465	473	483	492	500	509	518	527	535	545	556	626	680	723	762	794	817	838	855	872	883	890	903	913	921	924	930
Booting	N0	2	L3	299	292	298	304	310	316	323	333	337	342	351	360	367	377	385	394	396	411	420	429	438	446	455	464	472	482	491	500	509	518	589	648	692	729	761	786	805	823	837	850	858	868	878	883	886	889
Booting	N0	2	L4	261	260	264	270	276	281	290	292	300	308	314	322	329	336	342	354	358	365	374	381	390	396	405	412	419	426	435	442	448	455	515	556	589	616	636	653	666	678	687	690	699	704	707	708	713	718
Booting	N0	3	L1	331	328	336	339	347	352	359	366	373	381	389	401	407	417	425	435	444	454	464	475	487	493	503	514	522	533	543	550	560	572	650	711	761	803	836	864	888	909	928	943	954	965	978	986	992	997
Booting	N0	3	L2	317	317	321	328	336	344	350	358	368	374	385	396	405	416	422	435	445	457	468	480	488	499	508	517	527	539	548	559	561	577	651	708	754	794	826	846	866	885	900	909	917	927	936	939	944	946
Booting	N0	3	L3	305	300	304	310	317	322	329	334	344	351	358	361	374	381	390	399	408	417	426	434	444	451	460	470	479	487	496	504	510	519	590	649	693	732	761	786	809	828	840	853	864	874	878	883	890	896
Booting	N0	3	L4	272	265	271	274	279	283	288	293	297	305	308	314	319	327	332	339	344	350	356	362	367	374	380	386	393	394	402	410	416	423	470	512	544	571	593	609	627	641	653	663	666	673	681	687	691	693
Booting	N0	4	L1	354	348	355	363	371	380	387	395	404	415	423	435	446	458	469	479	489	501	514	525	537	549	558	569	580	590	601	611	622	632	713	774	821	858	889	914	933	951	963	980	985	993	1002	1006	1011	1013
Booting	N0	4	L2	317	312	322	325	332	338	345	354	361	368	372	384	392	403	411	421	432	441	450	460	471	480	492	501	513	521	529	539	550	561	641	708	758	798	830	860	880	897	912	927	937	944	950	956	964	965
Booting	N0	4	L3	276	272	278	283	289	298	304	312	320	328	336	345	354	358	374	384	394	405	414	424	434	443	455	464	473	483	490	499	509	519	593	652	697	733	765	790	812	827	842	856	864	871	879	886	890	890
Booting	N0	4	L4	266	265	267	272	277	281	288	293	299	305	313	315	322	329	335	343	348	356	359	369	377	383	391	398	404	410	416	422	427	436	488	531	563	590	611	629	644	656	665	675	678	685	688	692	694	697
Booting	N1	1	L1	321	316	321	325	330	334	339	346	349	354	360	366	372	379	384	387	396	404	409	416	424	433	436	444	450	456	464	470	477	482	544	589	635	670	700	724	741	764	782	795	806	819	827	834	841	848
Booting	N1	1	L2	365	357	362	365	372	379	385	393	400	404	412	419	423	435	444	451	459	467	475	483	492	506	510	521	528	536	544	554	564	571	644	703	751	789	822	850	870	894	909	925	936	948	957	969	973	979
Booting	N1	1	L3	322	316	321	325	332	333	339	344	349	347	358	361	367	373	378	384	390	395	401	406	413	420	422	432	436	442	444	455	460	465	519	565	600	639	665	688	709	725	739	758	764	776	785	792	797	802
Booting	N1	1	L4	307	298	301	307	312	317	323	328	333	340	345	353	357	365	371	382	385	392	398	404	413	420	427	432	443	446	454	460	468	473	529	576	610	641	664	689	698	712	725	733	740	747	753	759	761	763
Booting	N1	2	L1	315	308	312	318	323	323	331	337	344	350	356	367	369	376	383	389	397	403	412	418	427	436	442	450	457	464	473	481	484	494	562	619	667	707	738	770	790	814	835	849	862	877	889	898	905	915
Booting	N1	2	L2	308	302	307	310	315	322	323	328	333	338	341	349	354	359	365	371	378	382	388	398	401	409	415	422	427	434	440	447	455	459	519	570	610	645	675	700	723	741	759	773	786	796	807	814	823	829
Booting	N1	2	L3	291	285	292	293	300	303	308	313	319	323	329	335	336	345	353	357	365	371	381	385	391	397	406	413	417	425	430	439	445	452	514	568	615	653	681	710	734	753	769	787	798	810	817	829	836	843
Booting	N1	2	L4	275	269	274	279	284	291	288	301	306	312	320	326	332	338	345	349	359	369	374	382	390	396	403	411	414	426	433	440	445	452	510	556	594	624	642	666	683	698	707	717	723	731	736	737	741	744
Booting	N1	3	L1	330	324	329	335	340	346	352	357	359	372	379	385	393	402	409	416	425	431	441	451	459	467	476	484	495	498	513	521	528	536	608	667	716	757	786	817	842	864	882	900	911	925	935	946	953	960
Booting	N1	3	L2	345	340	345	352	358	365	373	381	390	395	405	415	424	434	444	454	463	468	481	492	502	514	524	536	542	553	563	572	581	591	671	731	785	825	860	891	911	933	953	970	980	990	1000	1013	1020	1022
Booting	N1	3	L3	290	284	288	293	299	302	307	311	317	320	328	333	339	344	349	355	357	368	375	381	388	393	400	406	413	422	426	432	441	444	499	545	583	613	644	661	680	697	713	724	732	741	753	757	761	765
Booting	N1	3	L4	279	275	280	285	290	294	300	306	311	318	323	330	336	342	351	357	366	370	379	386	392	401	409	415	421	430	435	442	450	458	517	568	606	638	665	687	704	714	731	741	749	755	760	767	773	770
Booting	N1	4	L1	376	370	375	381	387	395	406	412	421	428	437	446	455	466	475	488	497	506	514	524	534	545	554	562	575	581	592	598	608	617	690	749	792	833	861	887	908	925	942	957	966	977	987	997	1001	1007
Booting	N1	4	L2	318	311	314	319	324	330	333	341	344	349	355	361	368	374	382	387	397	401	408	416	423	430	439	443	453	457	466	472	480	487	551	605	650	690	725	751	776	797	816	834	847	859	872	883	890	896
Booting	N1	4	L3	311	307	311	317	322	328	332	335	345	349	357	363	368	378	384	388	397	405	412	420	427	436	443	449	457	464	472	479	487	495	552	602	643	677	706	728	747	765	781	791	801	811	819	824	831	835
Booting	N1	4	L4	274	270	274	279	282	288	293	298	303	309	315	321	330	333	339	345	352	358	365	374	378	388	393	400	406	413	421	426	434	440	502	547	589	621	650	672	692	709	723	733	744	752	755	765	771	776
Booting	N2	1	L1	282	274	278	282	286	293	293	299	301	305	310	315	321	326	334	334	340	346	352	357	364	368	374	379	387	394	398	405	413	415	468	513	551	584	610	631	652	669	685	697	709	718	727	734	742	747
Booting	N2	1	L2	296	289	291	297	302	307	313	312	323	326	332	337	343	350	356	361	366	374	382	388	394	404	406	413	420	426	432	440	447	451	508	558	598	634	661	685	705	725	744	756	768	780	790	796	805	809
Booting	N2	1	L3	276	270	277	280	283	290	293	297	303	307	311	319	324	329	335	341	346	352	357	360	370	377	382	389	394	400	406	411	420	424	474	517	549	580	607	625	642	658	666	681	688	695	702	709	712	716
Booting	N2	1	L4	330	324	332	343	349	360	369	381	393	406	416	430	441	455	468	481	495	508	525	532	547	558	571	584	595	607	617	627	635	647	725	784	824	859	880	901	917	932	940	946	961	963	967	969	972	976
Booting	N2	2	L1	340	333	340	346	352	357	363	371	372	387	395	403	409	419	429	436	445	454	464	474	484	493	501	513	520	530	541	547	556	565	640	703	750	793	827	855	881	907	924	939	955	969	980	989	998	1010
Booting	N2	2	L2	276	272	275	283	283	288	291	295	300	304	310	315	323	325	331	335	341	347	353	357	362	370	376	382	386	392	400	407	411	416	464	507	542	573	598	617	638	656	669	683	694	705	711	718	725	728
Booting	N2	2	L3	275	272	273	278	281	287	292	297	302	306	313	317	323	333	336	341	347	353	360	366	372	380	388	392	398	403	411	419	425	429	486	532	571	604	631	653	671	690	705	718	727	731	747	753	759	763
Booting	N2	2	L4	273	267	273	278	283	290	296	299	308	313	320	325	333	340	348	355	362	369	376	383	391	398	406	411	423	425	432	439	444	452	505	547	580	605	627	643	657	668	678	689	691	694	699	704	705	706
Booting	N2	3	L1	282	277	277	283	285	290	293	297	302	305	309	316	317	323	326	332	338	342	346	348	356	361	365	371	376	382	387	393	397	402	450	494	532	564	591	617	637	656	673	685	699	710	719	725	734	745
Booting	N2	3	L2	297	292	296	301	305	309	315	319	322	328	333	340	343	349	355	357	366	372	377	384	392	397	402	408	412	423	426	433	438	444	494	538	573	606	633	656	674	691	708	720	729	744	753	758	762	771
Booting	N2	3	L3	275	269	274	277	280	285	286	293	296	298	302	306	309	314	320	323	329	333	337	342	346	351	356	362	369	370	374	381	385	390	435	474	507	536	562	583	600	618	630	645	652	661	669	676	683	690
Booting	N2	3	L4	285	280	284	291	299	305	311	319	324	330	339	345	354	361	370	376	386	393	401	409	417	425	434	439	443	455	462	470	478	485	543	588	625	657	678	700	714	728	739	747	755	760	767	770	772	774
Booting	N2	4	L1	317	312	313	322	328	333	340	344	354	359	366	373	380	387	397	403	415	421	428	435	444	453	461	471	476	484	493	502	509	519	588	643	687	726	758	785	805	824	843	857	868	878	889	898	904	909
Booting	N2	4	L2	320	316	318	328	331	338	342	349	354	361	367	374	382	388	396	402	410	416	427	433	438	449	454	464	470	477	486	492	500	505	572	627	672	708	737	764	789	808	822	836	851	859	869	877	884	890
Booting	N2	4	L3	312	306	310	319	320	328	332	338	344	351	356	364	371	378	386	394	401	409	415	424	431	440	449	457	463	472	479	487	494	507	573	632	676	712	745	775	797	815	829	844	856	864	874	881	890	892
Booting	N2	4	L4	298	289	294	298	304	310	316	322	328	333	341	345	353	361	369	376	380	391	399	408	418	424	434	442	449	456	465	474	482	490	558	613	657	694	724	754	771	789	802	817	829	837	844	853	859	863
Growth stage	Nitrogen level	Sample No.	Leaf position	1e-05	2e-05	3e-05	4e-05	5e-05	6e-05	7e-05	8e-05	9e-05	0.0001	0.00011	0.00012	0.00013	0.00014	0.00015	0.00016	0.00017	0.00018	0.00019	0.0002	0.00021	0.00022	0.00023	0.00024	0.00025	0.00026	0.00027	0.00028	0.00029	0.0003	0.0004	0.0005	0.0006	0.0007	0.0008	0.0009	0.001	0.0011	0.0012	0.0013	0.0014	0.0015	0.0016	0.0017	0.0018	0.0019
Initial heading	N0	1	L1	324	322	328	335	342	345	359	366	377	385	396	407	416	427	438	446	460	472	484	494	505	513	528	537	547	558	568	576	588	594	667	718	760	794	817	837	855	869	881	887	896	903	907	910	914	915
Initial heading	N0	1	L2	294	293	297	302	310	315	323	327	338	347	354	364	373	381	390	401	410	420	430	438	449	459	468	479	487	498	505	515	523	529	602	659	703	736	763	785	808	818	829	841	851	858	864	869	873	876
Initial heading	N0	1	L3	282	277	282	285	292	299	303	310	315	320	327	333	340	348	354	365	369	375	382	390	399	405	413	422	428	436	441	449	457	464	521	569	608	638	660	678	693	707	721	729	735	743	747	753	757	759
Initial heading	N0	1	L4	250	245	248	251	254	257	262	263	267	270	274	278	280	284	286	292	297	299	302	306	311	315	318	323	325	330	332	338	341	345	378	408	434	452	471	484	497	506	513	521	528	534	539	538	544	547
Initial heading	N0	2	L1	327	322	328	334	341	351	356	364	372	379	389	396	406	417	427	435	446	453	463	473	484	493	503	513	520	526	537	545	554	562	630	681	717	754	780	801	818	835	849	859	866	872	882	889	893	896
Initial heading	N0	2	L2	295	288	293	298	304	310	317	322	331	338	348	353	359	368	375	385	395	403	410	419	430	436	445	454	463	472	479	487	495	502	569	624	667	698	727	750	769	784	796	809	818	824	830	836	841	845
Initial heading	N0	2	L3	295	290	296	301	307	310	319	322	330	335	342	350	357	365	372	374	386	394	403	411	421	426	434	442	449	457	465	474	481	487	550	599	638	673	700	721	737	753	768	778	785	794	801	809	813	817
Initial heading	N0	2	L4	278	272	277	279	279	287	291	296	299	303	307	310	315	320	328	329	335	340	344	347	354	358	363	369	372	378	381	386	390	393	435	468	494	516	535	552	559	572	582	588	596	601	606	611	615	617
Initial heading	N0	3	L1	299	290	300	306	312	316	325	331	341	348	358	370	376	386	394	405	415	426	436	447	456	467	477	488	498	508	516	527	535	543	616	675	720	753	780	802	822	837	850	860	871	881	885	889	897	900
Initial heading	N0	3	L2	300	299	305	310	317	322	330	335	343	349	361	369	378	386	394	405	413	423	431	437	451	461	470	478	486	495	505	514	522	529	601	651	692	724	749	770	787	800	814	821	828	835	843	846	849	852
Initial heading	N0	3	L3	317	315	321	323	332	338	345	351	358	363	370	380	386	399	404	411	421	430	437	446	457	465	472	482	490	499	506	516	524	532	603	655	699	731	761	780	800	814	828	841	849	857	867	871	874	878
Initial heading	N0	3	L4	268	264	267	273	281	282	288	293	299	303	309	316	323	330	336	343	346	355	362	370	376	379	391	397	402	408	414	420	426	434	483	523	553	577	595	612	621	631	640	647	652	657	661	664	667	669
Initial heading	N0	4	L1	304	302	308	314	320	326	328	341	347	355	362	369	376	385	392	399	409	412	420	426	435	441	448	453	459	461	469	475	481	486	528	559	584	603	619	633	642	651	660	664	670	674	678	684	686	689
Initial heading	N0	4	L2	343	340	347	355	361	369	377	386	394	403	413	423	430	442	450	459	469	481	490	500	508	518	528	536	545	554	562	569	576	584	647	694	731	755	774	790	804	817	822	827	833	837	839	842	845	846
Initial heading	N0	4	L3	327	323	330	337	345	349	360	367	378	386	398	405	417	425	433	448	459	470	481	491	504	510	521	533	541	552	562	571	580	585	662	719	764	801	827	848	868	881	891	899	906	914	916	916	921	924
Initial heading	N0	4	L4	302	298	302	309	313	320	326	336	340	348	357	363	371	379	389	398	406	415	426	436	443	453	467	473	482	491	501	509	519	529	606	669	718	758	793	819	837	854	869	879	890	896	900	906	909	910
Initial heading	N1	1	L1	349	344	353	355	360	366	373	380	388	395	401	408	417	425	433	444	452	460	469	478	487	496	507	517	526	534	543	550	563	570	650	713	763	806	842	871	897	915	933	952	966	977	991	1002	1011	1018
Initial heading	N1	1	L2	314	310	315	321	326	330	340	345	353	360	367	377	382	390	398	407	417	427	435	443	450	459	468	475	484	493	500	512	516	524	592	648	696	731	760	785	808	827	843	856	870	882	889	896	904	911
Initial heading	N1	1	L3	316	309	313	319	325	330	334	342	345	350	356	363	369	376	381	387	394	399	407	414	422	429	435	441	447	454	460	470	474	481	537	582	620	652	679	698	718	735	748	760	768	778	786	791	795	803
Initial heading	N1	1	L4	288	281	284	289	292	298	305	308	312	316	322	325	329	337	344	347	352	358	363	368	376	380	387	394	397	404	408	414	420	428	477	522	556	586	611	634	651	666	680	695	705	711	718	726	733	737
Initial heading	N1	2	L1	313	307	311	316	321	328	334	338	338	350	357	364	372	379	384	389	398	406	415	421	429	437	443	451	455	466	472	480	487	493	554	602	643	677	700	720	740	758	771	780	791	800	808	813	818	824
Initial heading	N1	2	L2	322	318	320	326	326	338	340	347	352	357	364	371	376	385	389	398	405	412	420	428	437	446	453	460	468	475	485	493	502	510	583	645	697	742	781	809	834	857	878	897	908	920	934	945	954	961
Initial heading	N1	2	L3	304	297	298	306	311	314	318	324	328	333	338	344	346	353	360	365	371	376	381	387	392	398	405	408	416	420	426	430	435	440	489	528	559	585	606	624	639	651	662	670	678	685	689	695	699	703
Initial heading	N1	2	L4	300	295	299	304	308	313	317	322	324	333	334	339	344	349	353	357	363	368	372	380	385	388	392	397	401	408	412	416	419	427	466	501	531	557	578	595	609	623	635	643	651	659	666	670	675	681
Initial heading	N1	3	L1	360	350	360	365	372	377	384	389	399	406	414	424	430	439	447	456	465	475	484	493	502	510	521	531	540	550	559	565	574	583	651	705	748	782	808	831	852	867	882	896	908	917	925	931	937	944
Initial heading	N1	3	L2	349	344	349	357	361	366	375	382	388	397	404	413	420	430	442	449	458	466	474	483	495	503	513	520	532	539	548	559	568	577	653	712	757	797	829	851	875	901	921	935	945	954	968	975	982	990
Initial heading	N1	3	L3	298	294	298	302	308	312	318	323	328	333	340	345	350	357	362	368	372	379	386	391	399	405	411	415	421	429	436	441	445	448	501	543	576	605	624	644	659	677	685	693	700	708	713	717	721	729
Initial heading	N1	3	L4	284	280	284	288	293	297	301	304	314	319	325	331	337	343	348	355	362	370	374	381	387	393	399	406	411	419	423	432	436	441	493	534	570	598	619	637	653	667	678	684	694	701	709	710	716	721
Initial heading	N1	4	L1	347	345	349	355	364	369	377	385	393	401	412	421	428	439	448	458	468	480	489	496	511	519	529	539	549	559	568	579	586	590	667	728	774	807	837	862	884	905	918	933	945	956	965	971	981	988
Initial heading	N1	4	L2	314	301	309	314	320	325	330	336	343	347	354	364	366	375	382	390	396	403	411	419	428	433	443	452	459	467	475	483	490	498	566	621	663	699	731	756	776	793	807	821	831	838	847	853	860	863
Initial heading	N1	4	L3	358	349	361	369	374	381	390	398	407	414	424	436	441	454	463	473	483	492	503	515	526	538	547	556	568	577	587	597	607	614	694	760	808	851	885	911	932	956	971	987	1001	1013	1024	1031	1035	1041
Initial heading	N1	4	L4	300	294	298	299	307	312	316	320	324	330	336	341	345	353	357	364	369	374	380	387	393	398	407	411	417	423	429	436	441	446	499	546	585	616	642	665	684	703	718	730	740	750	760	767	771	773
Initial heading	N2	1	L1	326	321	324	332	337	342	349	354	362	363	375	383	391	399	407	413	421	430	434	450	457	465	475	481	490	498	506	515	524	534	605	658	702	742	772	799	820	840	857	871	883	894	904	912	919	924
Initial heading	N2	1	L2	314	310	317	319	325	328	334	342	348	354	361	368	371	383	389	397	405	414	421	429	438	446	453	463	472	480	487	496	504	510	581	642	689	725	757	788	805	829	849	864	878	891	900	909	918	924
Initial heading	N2	1	L3	291	283	287	292	296	302	304	307	310	316	322	327	332	336	339	347	353	358	364	371	378	383	390	395	401	407	414	421	427	432	489	539	584	623	653	681	705	728	746	757	771	785	795	804	810	818
Initial heading	N2	1	L4	269	271	272	275	279	283	287	290	294	297	301	306	309	314	319	323	328	333	336	341	346	351	357	361	365	369	374	379	382	390	435	472	505	531	557	578	593	609	623	633	642	651	659	666	672	675
Initial heading	N2	2	L1	322	317	318	325	331	336	344	350	356	363	370	377	384	392	402	409	418	425	437	443	452	462	472	480	489	496	505	513	523	533	608	674	723	765	800	832	856	876	897	917	931	943	955	968	976	985
Initial heading	N2	2	L2	308	301	306	310	315	319	325	330	335	339	345	351	356	363	369	376	381	389	394	403	407	415	422	428	437	441	449	455	460	470	531	580	619	650	681	705	725	741	755	769	779	790	798	805	812	816
Initial heading	N2	2	L3	296	292	297	301	305	313	318	326	331	339	346	354	361	366	378	385	393	400	409	413	425	433	442	450	457	468	475	483	489	498	566	619	664	699	728	754	777	794	813	825	837	848	855	864	871	878
Initial heading	N2	2	L4	303	298	302	307	311	316	318	327	332	337	345	350	355	361	368	372	383	389	394	402	407	414	420	429	435	439	448	453	460	467	520	567	604	634	659	679	700	717	729	741	753	762	770	776	782	786
Initial heading	N2	3	L1	343	338	344	348	355	360	368	376	383	390	402	409	417	425	433	442	451	462	468	482	488	498	505	518	527	536	542	551	561	568	637	691	734	765	793	819	837	853	866	878	890	898	904	912	918	921
Initial heading	N2	3	L2	345	341	346	351	358	363	369	377	384	391	398	405	414	422	431	439	448	451	465	473	482	489	497	506	514	521	529	536	546	552	615	666	705	737	764	786	803	818	832	846	852	858	868	872	880	881
Initial heading	N2	3	L3	312	306	312	317	323	330	339	344	352	359	368	376	383	392	401	408	421	428	437	445	455	465	474	483	491	503	509	518	528	533	604	661	706	739	769	794	816	835	849	861	872	880	888	894	901	905
Initial heading	N2	3	L4	285	281	285	289	294	298	301	306	309	315	321	326	330	336	341	346	353	357	366	368	375	380	386	391	396	402	408	411	418	423	468	504	536	562	579	603	613	630	635	643	649	656	660	665	668	673
Initial heading	N2	4	L1	394	391	396	403	414	422	429	438	447	456	467	477	485	498	507	521	530	540	556	563	574	585	595	605	615	626	636	644	656	662	739	802	854	892	923	947	972	991	1005	1018	1032	1043	1049	1054	1062	1069
Initial heading	N2	4	L2	323	316	323	328	337	341	348	355	363	368	377	387	395	402	413	420	429	438	448	458	467	476	485	495	502	512	522	530	539	547	620	676	722	761	791	814	836	855	870	882	891	900	910	916	919	923
Initial heading	N2	4	L3	339	333	339	345	350	358	364	372	379	386	397	404	410	419	430	439	446	457	465	473	482	492	500	510	519	528	537	543	553	562	634	693	741	780	812	838	863	880	894	910	922	929	937	943	951	954
Initial heading	N2	4	L4	356	353	356	366	373	381	389	399	409	415	425	435	448	456	467	478	491	505	511	522	534	544	556	568	577	588	597	607	616	628	708	774	826	864	896	926	947	963	972	989	999	1007	1009	1018	1020	1022
Growth stage	Nitrogen level	Sample No.	Leaf position	1e-05	2e-05	3e-05	4e-05	5e-05	6e-05	7e-05	8e-05	9e-05	0.0001	0.00011	0.00012	0.00013	0.00014	0.00015	0.00016	0.00017	0.00018	0.00019	0.0002	0.00021	0.00022	0.00023	0.00024	0.00025	0.00026	0.00027	0.00028	0.00029	0.0003	0.0004	0.0005	0.0006	0.0007	0.0008	0.0009	0.001	0.0011	0.0012	0.0013	0.0014	0.0015	0.0016	0.0017	0.0018	0.0019
Heading	N0	1	L1	271	268	272	280	282	287	293	298	305	310	316	324	329	337	344	350	360	365	371	380	387	395	402	410	418	423	430	437	444	450	506	550	587	613	635	655	668	680	692	700	709	715	720	724	725	726
Heading	N0	1	L2	290	285	289	297	303	311	317	328	332	341	347	357	365	374	383	391	402	410	417	425	435	445	452	460	469	474	482	488	496	504	557	601	631	658	680	698	710	719	730	738	743	748	753	755	757	753
Heading	N0	1	L3	291	287	293	295	303	307	311	316	322	328	334	340	346	353	358	363	370	377	384	393	396	404	411	416	423	429	437	442	447	454	506	550	584	614	636	658	674	689	698	709	720	725	730	734	740	741
Heading	N0	1	L4	324	321	324	333	335	343	350	354	361	368	376	388	393	400	407	417	421	434	442	451	461	469	476	483	489	500	508	517	524	531	593	642	682	714	739	762	776	793	807	815	824	835	842	845	849	854
Heading	N0	1	L5	324	313	317	326	329	336	342	347	353	360	365	373	379	386	392	403	404	410	416	421	426	432	437	446	446	454	456	462	465	471	510	542	567	588	605	620	633	643	649	661	666	673	677	683	687	690
Heading	N0	2	L1	286	285	293	300	309	317	325	335	347	356	364	381	392	404	416	426	440	451	457	474	485	493	502	514	521	533	541	552	557	565	630	677	716	741	763	781	797	809	816	825	830	834	835	838	841	842
Heading	N0	2	L2	296	295	301	306	312	320	325	332	339	346	355	363	369	381	388	397	405	415	423	433	442	453	461	470	478	485	496	503	513	519	592	647	689	725	754	777	798	817	830	842	853	862	872	875	878	885
Heading	N0	2	L3	316	312	317	327	330	335	341	349	357	364	372	380	389	395	406	416	426	434	442	450	460	467	477	488	496	505	511	519	528	533	598	649	686	718	746	767	782	798	812	826	831	840	848	852	858	860
Heading	N0	2	L4	305	301	304	311	315	321	327	336	341	346	356	361	367	377	384	391	401	409	416	423	432	438	448	455	462	469	476	482	490	497	555	604	641	665	695	717	735	749	765	774	784	790	798	808	810	811
Heading	N0	2	L5	291	290	292	298	301	308	314	318	323	333	336	343	349	355	363	369	375	379	389	394	401	407	412	419	426	432	440	443	448	454	501	544	577	599	620	639	651	665	674	685	690	693	699	705	708	713
Heading	N0	3	L1	288	285	292	298	307	313	320	328	335	345	353	364	374	385	394	405	414	426	436	448	459	470	479	489	498	510	521	530	539	548	620	676	716	753	778	798	817	832	846	855	864	873	880	883	888	892
Heading	N0	3	L2	326	323	331	338	347	355	365	374	387	396	408	420	432	444	458	469	484	495	508	521	532	544	556	565	577	586	598	609	617	627	701	759	802	838	865	888	903	919	932	944	949	955	965	970	970	976
Heading	N0	3	L3	323	320	325	334	341	349	358	364	373	380	389	400	409	418	429	438	448	457	467	478	489	496	506	514	522	532	541	549	559	566	629	679	716	747	773	788	806	819	830	836	847	852	860	859	864	867
Heading	N0	3	L4	319	315	320	328	336	343	350	363	368	377	388	399	408	420	429	444	450	463	472	482	496	506	516	526	536	547	556	569	576	585	666	721	768	806	838	861	884	901	922	930	940	952	960	964	972	975
Heading	N0	3	L5	342	339	345	352	352	367	370	379	385	391	399	408	416	425	430	439	448	456	464	473	477	491	498	505	514	522	531	538	545	553	615	665	706	738	765	785	802	821	834	843	853	863	871	873	878	881
Heading	N0	4	L1	276	274	279	286	292	297	299	312	321	329	337	346	352	362	368	381	391	400	409	417	425	435	444	454	462	470	476	484	491	498	558	604	637	659	680	698	714	721	731	740	746	751	756	761	765	767
Heading	N0	4	L2	304	303	306	315	322	329	335	344	354	362	372	381	390	403	411	421	433	443	454	466	475	487	496	506	516	524	534	544	549	561	631	683	726	759	783	801	819	832	846	852	860	869	875	876	881	885
Heading	N0	4	L3	316	312	320	326	334	343	350	359	364	378	390	400	409	421	433	442	453	465	474	487	497	508	519	531	538	548	558	568	578	586	659	715	754	787	815	835	852	867	882	891	899	907	916	921	924	931
Heading	N0	4	L4	332	325	336	341	350	355	365	372	381	389	400	409	417	428	439	449	460	470	481	490	502	513	522	532	539	550	560	569	576	588	659	717	757	789	818	837	857	876	890	900	912	924	928	933	939	946
Heading	N0	4	L5	331	329	334	340	346	352	360	368	376	379	390	399	409	419	428	437	446	458	465	475	486	496	504	513	521	532	541	552	557	570	644	701	746	784	813	837	854	875	891	902	912	921	931	938	942	947
Heading	N1	1	L1	302	303	308	312	317	321	327	332	333	341	347	353	357	363	369	375	382	387	391	396	401	406	413	416	423	427	432	437	439	444	479	513	537	560	580	599	614	624	637	644	655	660	669	676	680	685
Heading	N1	1	L2	263	256	259	262	268	270	271	279	284	289	292	299	305	309	314	322	327	332	338	345	352	357	364	370	376	382	387	394	401	407	463	503	539	572	596	616	634	651	666	677	685	694	702	707	714	720
Heading	N1	1	L3	281	280	279	283	288	292	298	301	308	315	318	325	330	338	345	351	359	361	371	377	384	392	400	407	413	419	426	432	439	447	503	551	590	617	643	666	685	698	714	728	739	747	754	765	769	775
Heading	N1	1	L4	291	285	292	297	300	306	310	315	321	320	333	340	345	352	358	365	373	382	385	395	402	411	417	423	431	438	446	453	461	459	525	574	615	648	676	698	719	738	755	764	781	789	798	804	813	820
Heading	N1	1	L5	364	359	362	368	375	380	390	397	404	413	420	429	437	446	457	466	472	483	491	500	509	519	529	537	542	553	561	569	579	586	653	709	747	780	811	834	853	873	888	900	910	920	930	936	941	948
Heading	N1	2	L1	294	290	294	298	301	307	310	315	320	324	331	334	340	345	349	353	358	363	368	371	378	380	386	389	395	397	402	405	410	412	443	470	493	512	529	540	557	566	576	587	594	599	605	613	619	623
Heading	N1	2	L2	285	283	286	292	297	305	308	312	317	327	331	340	346	353	361	368	377	387	393	402	410	416	424	432	439	446	455	463	469	475	536	584	622	653	679	699	720	736	749	760	771	782	788	793	802	808
Heading	N1	2	L3	324	321	326	333	338	341	353	361	369	374	389	396	405	414	423	432	442	453	466	473	483	491	501	511	520	531	543	549	556	564	635	689	731	764	793	814	835	851	864	877	889	899	904	914	919	919
Heading	N1	2	L4	298	296	300	306	312	319	324	330	337	344	352	359	367	376	383	391	398	408	416	424	434	435	449	457	464	473	480	489	494	498	563	611	652	681	706	728	747	764	776	787	797	808	814	820	828	834
Heading	N1	2	L5	335	333	339	345	351	357	366	369	379	387	395	405	412	421	427	440	449	460	469	481	490	498	507	517	528	538	547	554	564	573	649	708	755	797	830	856	880	900	916	932	945	957	965	974	984	987
Heading	N1	3	L1	290	285	291	297	305	311	320	327	339	344	353	362	371	382	393	401	415	422	431	442	451	463	472	480	491	497	506	515	524	533	596	650	690	723	749	770	788	802	816	825	833	840	845	849	855	856
Heading	N1	3	L2	270	266	271	276	279	284	289	296	303	307	312	319	324	332	338	345	354	360	369	376	385	390	398	405	413	420	428	435	444	448	507	557	597	631	653	675	696	710	725	736	747	753	764	771	776	779
Heading	N1	3	L3	301	294	301	306	315	321	327	333	342	348	357	366	375	384	392	400	411	420	429	438	449	457	466	472	483	491	501	509	517	525	593	646	691	728	755	779	801	818	831	838	853	864	869	875	881	885
Heading	N1	3	L4	340	334	343	348	355	363	371	381	389	396	407	416	425	437	449	459	468	476	491	501	513	524	534	544	552	562	573	583	591	600	678	736	784	823	857	879	900	918	936	947	959	967	978	984	990	996
Heading	N1	3	L5	372	364	371	380	387	394	408	413	423	433	441	452	463	472	487	493	505	514	525	534	545	555	567	576	586	594	604	612	621	626	703	760	803	840	868	894	914	931	947	960	970	981	992	998	1002	1008
Heading	N1	4	L1	308	304	309	313	321	329	337	344	352	361	370	378	386	397	406	418	425	435	443	452	464	472	481	492	497	505	512	521	529	536	594	643	673	699	721	743	756	766	773	787	794	799	801	810	811	813
Heading	N1	4	L2	288	285	291	295	301	309	313	319	325	333	340	347	355	365	372	380	390	398	405	416	420	432	439	447	455	464	473	479	484	493	553	600	639	663	690	710	727	740	750	761	773	778	781	789	795	798
Heading	N1	4	L3	321	311	321	330	337	344	352	361	369	373	389	399	408	418	427	438	450	457	470	479	490	499	507	517	526	536	543	552	561	568	633	680	723	754	779	799	819	833	846	858	869	877	882	887	894	901
Heading	N1	4	L4	344	341	347	354	363	374	382	393	403	415	425	436	447	459	471	485	494	506	519	530	542	553	564	576	585	594	603	612	621	632	703	764	807	841	869	897	917	932	946	960	972	980	988	997	1001	1005
Heading	N1	4	L5	363	357	363	368	376	382	389	394	403	411	422	429	434	443	451	459	470	480	492	496	506	515	525	534	543	553	564	570	580	587	662	723	774	815	845	873	897	921	937	950	964	977	986	993	999	1009
Heading	N2	1	L1	340	333	339	345	351	358	365	373	381	387	395	404	410	420	433	440	448	457	465	474	484	492	505	508	518	527	533	544	551	560	631	682	723	760	789	815	835	852	869	881	890	898	908	916	917	919
Heading	N2	1	L2	329	325	332	341	343	350	355	362	370	376	384	392	399	408	414	418	432	440	448	457	466	473	483	491	499	507	516	524	530	539	602	655	699	733	760	784	803	822	835	848	860	868	875	883	890	893
Heading	N2	1	L3	305	299	303	307	313	318	322	329	334	339	344	352	357	365	371	378	387	392	398	405	413	419	427	432	443	447	453	459	467	475	530	578	613	644	668	688	706	723	735	744	753	763	772	775	780	786
Heading	N2	1	L4	301	297	303	308	313	318	325	331	338	345	357	361	368	377	385	394	402	410	421	429	438	444	453	460	469	478	488	496	504	510	576	627	669	703	728	749	769	787	796	808	821	829	834	839	848	850
Heading	N2	1	L5	345	339	345	352	359	365	371	381	388	395	405	413	420	431	437	448	457	468	476	484	493	503	510	523	532	539	546	554	562	571	640	696	742	777	806	832	857	873	888	903	917	925	934	944	950	954
Heading	N2	2	L1	292	288	292	296	300	307	310	312	324	327	334	341	348	355	362	368	377	383	391	398	404	414	419	426	434	440	448	455	461	467	525	570	603	633	655	676	693	710	720	729	738	746	753	753	761	768
Heading	N2	2	L2	275	269	273	275	280	284	288	291	297	299	304	313	312	322	325	331	336	341	341	350	359	365	365	376	380	387	390	397	404	409	462	500	536	563	589	608	626	643	655	668	677	689	697	703	709	710
Heading	N2	2	L3	239	235	238	242	247	251	255	259	265	267	274	279	282	288	292	300	306	311	316	320	328	334	339	347	351	357	361	368	373	379	426	462	490	513	533	552	565	577	589	601	608	614	621	630	633	636
Heading	N2	2	L4	313	306	311	317	323	322	334	340	346	351	360	366	373	378	388	398	405	412	419	428	438	439	452	461	466	474	482	491	499	504	567	614	652	685	711	733	755	769	784	796	805	816	825	830	839	844
Heading	N2	2	L5	349	343	351	356	365	371	381	386	394	403	412	421	430	438	451	457	466	476	486	495	504	514	524	531	541	549	558	567	575	584	656	709	752	790	819	844	867	886	903	914	927	938	948	953	962	970
Heading	N2	3	L1	292	287	291	297	300	306	311	316	323	327	333	341	348	355	361	369	376	382	391	400	406	414	421	430	435	444	452	458	465	474	536	585	621	652	682	701	719	732	749	763	773	783	791	800	805	811
Heading	N2	3	L2	310	305	313	316	322	326	333	338	345	348	357	365	372	378	390	397	407	415	422	433	441	448	460	469	475	485	492	501	512	521	590	648	691	729	761	788	808	829	847	863	872	881	896	904	910	919
Heading	N2	3	L3	321	314	325	327	335	342	349	356	364	369	379	387	396	406	414	423	433	443	453	458	470	479	490	498	504	514	522	532	540	550	617	665	708	743	772	796	816	830	847	861	874	881	891	899	902	910
Heading	N2	3	L4	285	280	284	288	293	296	302	309	312	317	323	329	334	342	349	357	363	369	376	381	391	396	405	415	418	426	432	440	447	453	518	567	606	642	672	696	712	733	750	763	777	784	796	803	810	815
Heading	N2	3	L5	348	343	349	355	362	367	373	378	388	397	405	413	418	428	437	449	456	464	471	479	490	498	508	516	525	532	539	549	556	566	631	681	726	758	786	811	831	848	858	870	885	894	900	907	914	918
Heading	N2	4	L1	295	290	296	300	305	309	315	322	326	332	338	344	353	359	365	375	379	386	395	402	409	415	423	433	437	442	450	458	464	471	530	571	609	639	667	685	704	719	736	744	754	763	772	777	782	789
Heading	N2	4	L2	329	322	331	333	339	345	351	356	364	365	377	386	393	401	409	417	426	431	444	453	461	470	478	488	494	502	512	521	530	535	605	656	703	741	768	789	816	834	851	857	877	887	895	903	909	916
Heading	N2	4	L3	312	307	306	317	321	326	330	335	342	347	350	359	364	370	377	382	388	394	398	405	414	418	423	430	436	440	446	452	458	462	507	542	571	595	614	625	644	656	665	671	680	681	691	693	698	698
Heading	N2	4	L4	304	303	304	309	314	318	326	332	336	344	349	356	362	369	377	384	389	401	405	412	421	427	436	442	446	456	463	469	478	484	540	586	619	649	671	691	704	719	730	737	745	754	760	764	761	771
Heading	N2	4	L5	333	329	333	343	347	354	361	368	376	384	393	400	407	416	424	433	444	451	459	469	478	486	496	505	512	522	529	539	545	553	621	674	720	753	782	807	830	848	862	876	887	899	908	915	923	929
Growth stage	Nitrogen level	Sample No.	Leaf position	1e-05	2e-05	3e-05	4e-05	5e-05	6e-05	7e-05	8e-05	9e-05	0.0001	0.00011	0.00012	0.00013	0.00014	0.00015	0.00016	0.00017	0.00018	0.00019	0.0002	0.00021	0.00022	0.00023	0.00024	0.00025	0.00026	0.00027	0.00028	0.00029	0.0003	0.0004	0.0005	0.0006	0.0007	0.0008	0.0009	0.001	0.0011	0.0012	0.0013	0.0014	0.0015	0.0016	0.0017	0.0018	0.0019
Initial filling	N0	1	L1	298	294	303	306	313	318	326	335	344	348	359	366	374	382	395	400	412	420	428	437	444	451	461	470	482	486	494	499	506	513	572	615	650	674	693	708	721	731	734	739	751	752	754	755	756	761
Initial filling	N0	1	L2	327	329	339	349	362	374	387	401	416	428	445	461	475	491	506	520	535	547	561	572	586	597	609	618	627	634	645	654	663	672	733	775	808	829	847	861	869	877	882	885	888	893	898	898	898	899
Initial filling	N0	1	L3	307	303	311	316	318	327	333	340	347	355	360	369	374	381	387	392	400	406	413	419	419	430	435	442	446	451	456	461	465	470	509	540	564	582	594	609	616	622	629	634	636	640	640	644	647	646
Initial filling	N0	1	L4	315	311	316	321	327	334	339	346	353	361	368	374	378	390	396	404	412	418	425	432	439	445	451	459	464	470	476	481	486	490	537	571	595	616	631	644	653	660	666	670	676	679	678	680	684	684
Initial filling	N0	1	L5	218	218	223	230	238	247	253	264	271	278	288	294	298	310	317	323	329	335	338	343	349	352	357	361	363	368	371	374	379	381	399	410	418	423	428	431	433	435	438	436	438	439	440	435	439	440
Initial filling	N0	2	L1	261	260	272	279	290	300	313	324	336	349	361	373	388	398	409	419	431	443	451	460	468	475	482	491	499	507	512	520	526	530	571	601	625	638	649	654	665	670	672	676	680	681	682	682	685	684
Initial filling	N0	2	L2	261	262	269	276	287	293	301	311	321	330	343	352	363	373	383	393	403	412	422	426	442	448	456	465	471	478	486	492	499	505	549	585	608	627	640	647	654	661	663	663	665	665	665	666	670	671
Initial filling	N0	2	L3	292	289	296	304	315	321	329	338	347	358	368	379	390	400	414	422	433	444	455	464	477	487	497	503	516	525	536	543	552	559	622	675	709	737	758	771	785	795	804	811	815	820	822	825	826	828
Initial filling	N0	2	L4	290	287	293	300	306	313	319	325	335	341	349	357	364	372	381	389	397	398	411	419	427	433	440	447	454	459	465	465	477	482	527	560	583	599	615	627	632	636	641	643	648	649	648	651	649	650
Initial filling	N0	2	L5	327	324	330	339	352	355	365	372	382	392	402	411	421	430	440	450	459	469	478	484	496	503	511	519	527	534	542	549	553	563	612	645	673	692	707	716	725	731	736	738	740	742	742	743	743	745
Initial filling	N0	3	L1	243	243	249	259	265	274	283	294	303	313	324	334	346	354	365	374	385	395	403	413	421	424	436	444	450	456	465	469	476	480	522	552	572	587	596	604	613	617	618	620	622	626	623	624	626	625
Initial filling	N0	3	L2	372	370	379	394	407	421	433	449	468	483	501	520	533	551	568	582	599	614	629	644	657	669	682	694	706	717	729	739	747	756	828	881	918	948	969	989	1003	1014	1024	1029	1040	1044	1051	1056	1055	1057
Initial filling	N0	3	L3	297	294	305	310	313	325	333	342	350	360	372	379	390	399	410	419	430	439	450	461	468	476	486	495	503	511	520	526	534	541	600	638	669	693	710	724	734	745	752	756	761	764	771	772	773	776
Initial filling	N0	3	L4	346	342	352	358	369	377	387	398	407	417	429	441	448	464	476	487	501	513	522	537	546	559	568	579	589	600	609	616	627	635	706	754	799	826	849	869	881	892	899	909	917	920	923	925	929	930
Initial filling	N0	3	L5	324	319	324	327	335	343	350	359	368	375	382	389	396	405	414	423	432	440	447	453	462	471	479	488	496	502	509	516	525	528	583	626	658	680	699	716	729	739	745	751	760	764	764	771	774	780
Initial filling	N0	4	L1	250	246	253	260	267	272	280	286	298	302	311	317	324	331	339	343	352	356	361	365	371	375	380	389	389	394	398	403	404	407	436	455	468	478	484	490	495	498	500	501	503	505	507	508	511	513
Initial filling	N0	4	L2	327	325	333	342	350	361	373	381	392	403	414	426	437	452	464	471	488	499	513	524	535	547	558	570	579	590	599	608	617	626	697	745	785	817	840	860	874	884	897	907	912	916	923	928	931	932
Initial filling	N0	4	L3	336	333	339	345	352	360	371	377	385	393	401	411	420	431	439	451	461	471	480	491	503	511	521	529	537	548	557	566	574	583	652	702	742	774	798	817	827	846	860	866	871	878	884	889	891	892
Initial filling	N0	4	L4	397	396	405	416	427	438	453	464	478	492	509	521	538	552	569	584	592	616	627	640	654	666	680	693	705	716	729	738	747	758	839	897	943	978	1002	1025	1045	1059	1066	1082	1087	1095	1098	1102	1105	1110
Initial filling	N0	4	L5	396	392	398	404	409	415	422	430	436	444	450	457	465	472	480	488	492	504	513	520	526	535	543	552	560	564	575	578	587	594	651	699	735	762	785	805	820	829	843	848	859	864	866	870	872	878
Initial filling	N1	1	L1	317	314	319	325	333	339	348	357	365	374	378	393	401	413	420	432	439	449	459	469	478	489	498	508	514	523	533	540	549	557	617	664	699	728	751	768	781	795	805	815	820	824	829	835	837	839
Initial filling	N1	1	L2	316	309	315	323	331	336	344	351	360	365	375	385	392	400	410	421	425	435	443	451	460	468	474	482	488	494	502	510	516	523	571	611	640	665	683	698	710	721	729	735	739	742	746	757	755	758
Initial filling	N1	1	L3	342	335	342	350	358	370	376	388	400	410	420	434	446	458	469	481	498	505	517	529	540	553	564	574	585	598	604	613	623	632	706	763	803	834	860	882	898	912	924	936	943	947	953	961	963	969
Initial filling	N1	1	L4	323	317	322	327	335	341	349	355	363	371	377	384	392	402	409	418	427	436	443	450	460	466	476	484	490	498	505	515	519	527	581	627	659	683	704	720	736	744	753	760	764	768	772	777	781	781
Initial filling	N1	1	L5	323	321	326	330	338	343	349	357	363	364	375	384	389	397	406	413	419	427	434	441	448	455	462	470	472	483	488	496	501	509	563	604	638	667	686	704	717	731	740	747	756	760	764	769	771	772
Initial filling	N1	2	L1	320	316	320	328	334	341	347	353	362	370	378	386	393	401	412	419	428	437	445	452	461	468	477	488	493	502	509	517	521	530	589	632	668	696	717	734	750	762	770	779	787	793	797	800	806	811
Initial filling	N1	2	L2	283	278	283	288	293	299	301	311	317	324	330	336	341	348	355	363	369	377	382	390	397	401	407	415	422	427	432	440	444	449	495	532	558	578	594	609	621	631	636	644	649	654	658	660	662	665
Initial filling	N1	2	L3	347	344	350	356	366	370	377	387	394	404	415	422	433	442	451	462	472	482	493	501	512	521	530	539	550	560	568	574	585	591	658	707	748	777	800	818	836	848	858	865	874	879	883	886	889	892
Initial filling	N1	2	L4	320	318	325	330	338	341	350	355	364	371	379	387	394	400	407	416	424	432	438	447	452	458	465	472	481	486	492	496	503	509	554	591	615	636	652	663	674	682	688	693	698	701	703	707	709	709
Initial filling	N1	2	L5	362	359	363	367	375	381	388	394	401	407	415	421	427	436	444	453	459	468	474	483	491	496	507	515	524	528	534	541	550	555	612	656	689	710	738	754	765	773	784	791	793	800	803	811	811	813
Initial filling	N1	3	L1	246	244	251	260	264	275	281	289	299	308	316	325	333	339	348	356	363	371	377	381	391	397	402	406	412	418	422	428	429	435	467	490	506	521	530	537	542	550	552	554	554	560	559	560	560	562
Initial filling	N1	3	L2	337	333	338	345	350	358	364	370	380	386	393	399	407	415	424	431	436	443	450	456	462	471	476	484	489	495	499	504	512	517	560	596	622	646	662	678	688	698	705	712	717	723	726	726	737	739
Initial filling	N1	3	L3	284	276	281	285	288	295	299	305	313	317	324	331	337	345	352	358	367	375	381	388	395	401	411	418	423	431	438	444	450	459	510	555	589	614	637	655	674	686	698	707	715	724	729	729	738	743
Initial filling	N1	3	L4	264	261	264	268	275	281	285	289	298	305	312	318	326	327	338	345	353	360	367	373	382	389	389	401	408	414	420	426	432	437	486	521	550	573	592	605	615	627	634	643	646	652	656	658	661	664
Initial filling	N1	3	L5	302	293	298	304	309	316	318	323	328	334	339	344	349	354	360	365	370	376	380	387	393	397	402	404	411	416	423	426	432	442	479	508	533	555	573	587	595	606	616	624	628	633	638	643	648	651
Initial filling	N1	4	L1	257	256	263	271	279	286	296	304	315	324	335	342	355	364	373	384	394	403	411	419	425	435	441	448	455	463	468	474	478	484	527	554	579	595	605	616	625	629	633	638	641	645	646	645	651	649
Initial filling	N1	4	L2	333	331	341	346	355	364	373	382	393	402	414	426	436	448	458	469	481	493	503	515	526	536	545	555	564	573	584	592	599	608	672	721	759	788	810	831	844	859	866	874	882	888	893	897	898	903
Initial filling	N1	4	L3	364	361	369	375	384	392	403	410	421	432	442	454	464	476	489	498	507	521	532	544	556	566	576	586	596	606	616	625	634	643	714	766	807	840	868	889	906	922	936	947	955	965	970	976	980	984
Initial filling	N1	4	L4	295	293	297	304	311	317	324	331	339	345	354	361	369	380	388	396	404	413	421	429	439	449	456	464	472	478	490	494	504	510	569	613	649	678	702	718	732	749	759	767	776	784	789	795	798	800
Initial filling	N1	4	L5	371	365	371	379	384	389	398	405	413	419	427	432	441	451	459	468	477	488	492	501	509	517	525	533	543	550	558	562	570	575	637	688	724	752	775	795	813	825	833	843	848	855	858	860	865	868
Initial filling	N2	1	L1	266	262	265	274	278	285	291	297	305	310	319	325	336	338	348	356	364	373	379	387	393	399	406	414	422	431	434	445	446	452	501	539	569	589	607	622	638	644	644	659	664	668	669	672	674	678
Initial filling	N2	1	L2	292	288	293	298	304	309	317	321	329	336	342	349	356	366	374	382	388	396	405	412	420	429	437	443	451	460	466	474	481	486	544	588	621	648	672	685	706	718	729	739	745	750	756	759	762	768
Initial filling	N2	1	L3	292	288	294	298	305	310	316	324	329	337	343	352	358	365	375	382	386	399	406	413	422	429	437	446	452	458	469	472	479	486	542	584	618	644	664	682	696	707	716	723	734	736	739	743	746	748
Initial filling	N2	1	L4	301	300	301	307	313	321	327	335	344	350	359	367	376	385	394	403	416	419	429	438	448	456	465	473	482	483	496	504	512	518	576	622	658	684	706	725	739	747	758	771	778	782	788	791	796	799
Initial filling	N2	1	L5	293	288	292	291	301	306	311	316	321	327	332	337	343	350	354	360	367	372	376	385	389	394	402	407	412	418	422	428	432	441	484	521	551	573	593	609	623	632	641	651	659	662	666	672	677	679
Initial filling	N2	2	L1	386	385	394	406	416	427	439	453	464	479	490	501	513	524	535	548	559	569	583	586	597	606	615	624	631	639	646	650	657	665	716	750	780	796	807	822	831	838	843	848	853	857	858	859	863	866
Initial filling	N2	2	L2	288	280	283	287	291	291	299	303	306	307	313	317	319	326	329	335	336	339	343	347	352	356	361	363	365	369	373	377	382	384	415	442	462	480	493	506	514	522	533	538	541	547	551	557	556	560
Initial filling	N2	2	L3	321	311	322	325	331	337	344	349	357	363	367	378	386	395	403	411	417	426	433	443	450	459	465	474	482	490	498	504	513	519	580	631	669	699	723	746	763	776	788	799	810	816	821	828	834	836
Initial filling	N2	2	L4	272	267	272	273	277	281	286	288	292	295	299	303	306	311	317	321	326	330	334	335	342	346	352	357	361	367	366	372	379	382	421	456	483	505	524	540	554	568	574	585	593	597	601	608	613	615
Initial filling	N2	2	L5	387	381	388	395	402	407	414	420	428	437	445	454	461	470	478	489	497	507	519	527	537	546	556	565	576	584	593	602	612	619	694	755	804	842	871	893	915	934	948	958	971	980	989	993	999	1005
Initial filling	N2	3	L1	286	282	290	297	300	312	319	327	335	345	353	363	372	375	389	397	406	416	425	430	440	448	455	465	469	479	485	490	494	501	550	586	614	634	649	665	675	682	690	694	699	703	705	708	709	715
Initial filling	N2	3	L2	281	276	281	285	291	294	300	305	313	315	323	327	333	339	345	353	359	365	371	379	384	392	397	405	411	417	422	427	434	439	487	527	560	582	602	620	635	646	655	664	672	677	680	685	690	694
Initial filling	N2	3	L3	287	282	287	292	297	303	308	313	319	325	327	336	341	349	356	362	373	376	383	388	395	401	407	413	421	424	432	437	444	448	496	533	564	586	605	624	636	646	653	663	670	674	677	683	688	689
Initial filling	N2	3	L4	319	315	321	324	332	338	344	352	358	369	373	380	388	397	404	412	421	428	430	444	451	459	467	476	482	488	496	503	508	517	571	613	648	673	696	715	730	743	752	756	774	777	782	787	791	795
Initial filling	N2	3	L5	317	314	319	325	331	336	343	349	357	362	371	376	383	389	396	404	412	418	425	435	440	447	454	461	467	476	481	488	495	499	551	594	628	654	675	692	710	722	731	741	748	754	756	762	766	771
Initial filling	N2	4	L1	301	295	298	301	309	313	320	322	329	334	340	345	349	358	362	370	375	381	387	392	400	405	415	419	424	429	435	440	448	453	501	541	571	597	617	634	648	652	666	679	682	687	690	695	698	700
Initial filling	N2	4	L2	295	293	301	308	317	322	330	340	348	356	365	375	385	393	401	411	420	430	435	447	455	462	470	477	485	493	498	504	515	518	567	603	629	649	664	674	683	689	695	700	701	704	706	706	708	708
Initial filling	N2	4	L3	389	386	396	404	412	423	434	445	455	469	481	489	504	517	530	541	555	567	579	590	598	612	622	633	644	653	664	672	680	689	757	812	853	884	907	924	940	955	963	969	978	983	987	985	992	994
Initial filling	N2	4	L4	316	310	316	320	324	330	336	341	345	351	359	363	369	375	382	388	394	400	407	417	420	428	434	443	445	454	460	467	472	479	536	580	615	646	669	687	702	715	726	735	741	747	748	759	761	763
Initial filling	N2	4	L5	299	294	300	305	312	318	325	333	337	345	353	362	368	377	382	394	401	408	415	424	429	438	445	451	458	464	470	476	484	489	539	573	603	625	646	660	672	682	691	699	704	708	717	721	723	725
Growth stage	Nitrogen level	Sample No.	Leaf position	1e-05	2e-05	3e-05	4e-05	5e-05	6e-05	7e-05	8e-05	9e-05	0.0001	0.00011	0.00012	0.00013	0.00014	0.00015	0.00016	0.00017	0.00018	0.00019	0.0002	0.00021	0.00022	0.00023	0.00024	0.00025	0.00026	0.00027	0.00028	0.00029	0.0003	0.0004	0.0005	0.0006	0.0007	0.0008	0.0009	0.001	0.0011	0.0012	0.0013	0.0014	0.0015	0.0016	0.0017	0.0018	0.0019
Filling	N0	1	L1	156	158	166	164	169	171	175	178	182	185	188	192	192	199	202	206	209	212	216	217	221	224	227	228	230	233	235	238	239	241	257	268	275	284	288	293	296	299	303	306	308	309	312	313	315	317
Filling	N0	1	L2	165	165	169	174	182	185	189	197	202	207	215	218	223	230	235	240	243	248	250	255	259	264	268	265	273	276	278	281	285	286	304	315	324	331	336	339	343	345	348	348	350	350	352	351	353	359
Filling	N0	1	L3	202	198	204	208	214	219	224	231	237	242	249	254	260	265	271	276	280	286	291	294	301	303	306	309	312	315	318	321	324	326	346	359	366	376	378	382	386	386	389	390	394	392	393	393	392	393
Filling	N0	1	L4	185	184	188	187	195	199	204	207	212	216	219	224	226	232	239	240	243	247	251	255	258	260	263	266	268	271	274	273	278	280	293	306	315	317	323	323	328	330	331	333	335	336	335	336	339	338
Filling	N0	2	L1	207	207	209	213	219	223	226	232	236	240	244	249	254	258	261	269	272	276	281	286	290	294	297	301	304	310	312	315	319	321	349	363	379	385	395	403	408	414	417	420	423	427	429	432	433	432
Filling	N0	2	L2	209	209	214	218	225	228	236	242	249	254	260	267	274	278	285	290	296	301	307	312	315	320	323	328	333	337	342	344	347	345	374	394	406	413	423	429	436	441	445	446	450	453	455	455	457	463
Filling	N0	2	L3	240	231	236	240	245	248	252	258	262	265	270	277	281	285	290	294	300	305	310	315	317	325	326	330	336	339	344	343	352	355	386	406	424	436	446	457	460	466	469	472	476	479	481	481	482	485
Filling	N0	2	L4	236	235	238	243	247	252	258	265	270	276	284	288	294	302	312	316	323	328	333	338	345	351	357	364	368	376	378	384	388	393	430	460	479	494	509	520	525	529	537	539	542	544	546	549	551	552
Filling	N0	3	L1	168	168	171	176	180	187	189	194	199	203	208	215	217	223	227	232	234	241	243	246	250	253	256	261	262	266	267	270	271	276	292	303	310	317	323	327	331	334	339	340	342	345	347	348	348	350
Filling	N0	3	L2	161	160	165	167	171	175	179	184	191	193	197	201	204	209	213	216	219	225	229	228	232	235	238	241	238	245	248	250	251	253	267	276	283	289	293	297	299	303	304	306	308	309	309	311	310	313
Filling	N0	3	L3	213	211	218	225	232	241	248	260	266	276	284	294	303	310	321	328	336	344	351	356	364	370	374	382	386	391	394	398	400	407	433	450	456	469	475	480	485	485	489	487	489	487	488	489	486	481
Filling	N0	3	L4	239	235	245	250	256	263	270	277	284	293	299	309	313	322	330	338	344	348	355	363	369	374	380	383	391	395	400	403	409	412	442	463	476	487	499	502	507	512	515	517	519	519	520	523	522	517
Filling	N0	4	L1	176	175	182	187	194	203	210	218	226	235	245	253	263	272	280	293	296	305	312	319	327	334	340	345	350	353	358	366	370	373	403	419	432	439	447	451	456	458	460	459	461	462	463	461	459	462
Filling	N0	4	L2	246	240	245	249	254	261	263	270	276	281	290	294	300	306	311	318	327	331	338	345	350	355	358	367	373	379	384	390	393	398	437	471	493	513	528	540	547	560	567	572	577	581	583	585	588	589
Filling	N0	4	L3	232	230	232	240	244	250	255	261	265	273	276	282	287	294	298	308	311	316	321	326	331	337	341	346	349	354	355	361	365	369	396	417	432	443	452	459	464	471	475	478	482	482	486	487	489	490
Filling	N0	4	L4	246	243	247	252	256	262	266	272	275	281	286	292	297	303	308	312	318	323	328	333	339	343	346	352	358	361	365	370	374	379	413	435	454	470	480	489	497	504	509	512	517	521	524	525	523	526
Filling	N1	1	L1	262	261	266	274	280	288	291	301	307	315	323	334	339	347	355	362	370	379	385	393	400	408	411	419	424	431	436	441	448	451	490	520	541	557	569	579	587	594	600	603	609	613	615	618	621	625
Filling	N1	1	L2	253	251	257	265	273	277	287	295	303	313	321	328	339	345	353	361	370	377	387	392	401	405	412	418	423	431	436	440	447	448	486	513	534	547	558	566	576	582	585	591	596	599	600	602	607	608
Filling	N1	1	L3	278	278	285	293	300	308	317	324	334	341	351	360	370	376	387	396	405	414	422	429	438	443	451	457	463	470	476	483	487	491	533	561	582	596	606	615	624	631	635	637	642	644	645	646	647	649
Filling	N1	1	L4	244	240	244	247	248	253	256	259	264	266	267	273	277	279	282	286	288	292	294	297	300	303	305	310	311	313	314	317	320	321	340	356	368	377	384	390	394	398	401	405	406	409	410	411	412	413
Filling	N1	2	L1	263	260	266	274	280	291	299	309	321	328	338	349	361	372	388	396	407	419	430	442	451	466	471	482	490	499	508	516	524	534	594	637	668	693	711	726	736	746	755	762	764	770	775	778	774	780
Filling	N1	2	L2	256	257	264	272	282	295	303	315	327	340	354	363	380	393	406	419	433	444	456	467	478	490	500	511	521	528	537	543	553	561	616	654	679	697	714	727	736	744	753	759	761	766	771	772	775	773
Filling	N1	2	L3	281	279	288	294	303	310	321	329	340	351	362	373	384	395	406	417	427	438	449	460	468	477	486	493	503	513	522	528	532	540	593	627	649	670	684	692	705	712	717	721	726	730	731	733	735	737
Filling	N1	2	L4	287	285	289	296	302	307	312	318	324	333	338	343	351	357	364	373	376	384	390	397	403	410	415	421	426	432	437	439	448	452	491	521	545	563	577	588	597	605	610	616	620	625	628	630	634	632
Filling	N1	3	L1	345	340	346	355	359	365	372	377	385	392	397	406	412	419	426	427	440	447	453	459	467	473	477	483	490	497	500	506	512	517	559	589	614	638	654	667	682	693	705	712	720	726	733	737	741	749
Filling	N1	3	L2	266	266	274	280	290	299	308	318	329	338	352	362	373	384	393	405	417	424	434	442	450	458	465	475	482	485	495	500	506	513	555	590	614	630	644	654	663	670	672	681	686	690	691	692	696	698
Filling	N1	3	L3	361	358	366	373	382	389	398	408	417	426	435	442	450	459	467	476	483	490	497	503	510	516	523	530	534	540	542	550	555	559	594	625	644	659	674	687	697	703	710	717	726	728	733	738	742	745
Filling	N1	3	L4	325	320	327	330	337	343	345	351	357	361	368	373	380	385	390	394	403	408	415	421	426	432	436	442	447	453	461	464	468	473	513	546	571	592	609	624	634	643	652	657	663	667	669	674	675	678
Filling	N1	4	L1	276	272	279	282	286	291	295	300	306	310	317	322	330	334	339	347	354	361	367	371	379	384	390	397	404	410	413	419	425	431	478	516	547	573	589	605	620	631	640	649	654	664	660	670	676	679
Filling	N1	4	L2	329	329	336	346	355	363	374	386	396	409	422	435	448	461	475	489	502	518	533	544	558	569	583	595	606	619	629	639	650	660	740	801	847	881	908	935	954	969	981	995	1004	1011	1018	1024	1033	1036
Filling	N1	4	L3	277	275	282	290	300	309	320	329	338	351	363	372	384	397	409	421	434	443	453	462	475	484	496	502	512	520	526	535	541	549	601	636	660	677	692	704	711	718	724	729	731	734	738	741	741	742
Filling	N1	4	L4	321	316	324	331	339	349	355	363	374	383	394	405	414	425	433	445	458	469	479	490	495	509	520	530	540	548	559	567	575	583	652	703	743	771	795	815	832	846	856	866	875	880	885	895	898	903
Filling	N2	1	L1	248	246	249	253	260	263	267	273	274	283	290	297	303	308	314	320	328	334	341	347	353	361	368	374	379	388	390	399	406	410	460	499	529	551	571	587	598	608	615	621	629	633	635	643	644	648
Filling	N2	1	L2	242	238	247	248	252	256	262	267	273	276	282	286	293	298	300	307	312	317	321	326	332	335	339	345	347	352	356	361	365	368	397	422	439	454	467	475	486	496	501	506	510	517	519	519	527	530
Filling	N2	1	L3	249	246	250	256	260	260	271	276	281	287	292	297	307	310	317	322	328	333	342	347	352	358	364	370	377	381	386	390	396	400	439	470	495	512	523	540	547	555	556	566	569	571	573	578	579	580
Filling	N2	1	L4	240	234	238	241	244	246	253	253	257	259	263	267	269	272	274	278	285	286	288	290	292	296	299	301	305	307	310	312	309	316	330	349	362	370	376	382	387	390	390	394	398	401	400	402	403	404
Filling	N2	2	L1	264	265	269	275	283	291	299	308	316	325	333	343	352	362	370	379	389	393	404	411	418	426	435	441	448	453	458	464	469	474	516	545	567	580	596	605	613	619	629	633	637	639	646	649	652	654
Filling	N2	2	L2	265	263	269	275	280	288	294	300	307	313	322	329	337	345	352	360	370	376	387	395	401	408	419	424	431	439	447	452	456	465	515	552	581	603	620	633	647	655	663	668	673	679	684	684	688	690
Filling	N2	2	L3	268	266	272	275	276	287	292	298	303	310	315	320	327	334	341	346	354	360	364	372	376	381	389	394	399	404	409	413	419	424	462	488	509	528	540	550	556	565	570	571	577	578	581	584	585	587
Filling	N2	2	L4	255	252	255	260	265	270	276	280	287	289	296	300	303	310	317	320	326	328	337	340	349	354	358	362	370	372	376	379	386	390	426	455	476	498	512	522	529	538	549	551	555	559	567	566	566	569
Filling	N2	3	L1	272	268	274	280	286	292	299	306	312	316	328	334	341	350	355	364	371	378	384	391	397	403	410	417	422	426	433	436	441	446	483	514	532	547	561	570	577	583	591	597	600	601	603	606	608	609
Filling	N2	3	L2	300	295	303	309	314	319	326	335	340	347	354	361	368	377	382	391	397	404	410	416	425	430	436	443	448	454	461	466	472	476	515	549	574	595	607	620	630	639	645	651	657	661	665	663	673	675
Filling	N2	3	L3	300	296	302	307	311	316	322	329	333	339	344	351	356	361	368	374	379	387	393	396	403	408	413	421	423	429	433	437	440	444	484	509	530	544	554	567	573	579	584	588	592	594	591	601	598	596
Filling	N2	3	L4	307	304	309	312	320	323	330	334	340	346	352	357	363	370	374	381	387	393	398	403	409	415	420	425	431	437	440	446	449	456	494	525	548	565	580	594	599	607	616	619	627	631	631	635	638	637
Filling	N2	4	L1	273	272	276	281	290	297	302	310	317	324	334	342	348	356	364	373	378	388	396	405	411	417	424	432	438	446	453	459	464	469	513	548	571	592	604	616	626	634	639	643	648	655	654	655	657	661
Filling	N2	4	L2	244	243	248	253	258	264	270	275	283	289	291	305	313	319	328	334	342	349	357	364	374	379	389	394	400	407	414	422	427	434	483	517	546	570	585	598	608	616	626	630	635	639	643	647	647	648
Filling	N2	4	L3	289	287	295	299	307	312	318	326	338	342	349	358	366	375	382	392	400	408	419	425	434	441	449	458	469	475	481	486	495	502	560	602	635	662	680	698	711	723	731	742	749	754	757	761	765	767
Filling	N2	4	L4	261	259	262	267	269	276	280	284	289	294	298	303	307	312	320	322	327	331	336	341	347	350	354	358	363	367	370	374	377	383	413	436	454	470	483	491	500	507	513	517	518	525	528	531	531	534
[truncated: 146 more columns]

## Sheet: JIP parameters
Growth stage	Nitrogen level	Sample No.	Leaf position	t for Fm	Area	Fo	Fm	Fv	F1	F2	F3	F4	F5	Fo/Fm	Fv/Fm	PI Inst.	Fv/Fo	Vj	Vi	dVG/dto	dV/dto	Sm	N	Sm/t(Fm)	ABS/RC	DIo/RC	TRo/RC	ETo/RC	REo/RC	phi(Po)	psi(Eo)	phi(Eo)	delta(Ro)	phi(Ro)	ABS/CSo	DIo/CSo	TRo/CSo	ETo/CSo	REo/CSo	ABS/CSm	DIo/CSm	TRo/CSm	ETo/CSm	REo/CSm	gamma(RC)/((1-gamma(RC))	phi(Po)/((1-phi(Po))	psi(Eo)/(1-psi(Eo))	PI abs	dRo/(1-dRo)
Initial tillering	N0	1	L1
Initial tillering	N0	1	L2	600	47040	488	1010	522	528	573	688	823	657	0.4832	0.517	0.1292	1.07	0.6418	0.3238	0.8621	1.2771	90.1141	179.332	0.1502	3.8505	1.8604	1.99	0.7129	1.346	0.5168	0.3582	0.1851	1.8877	0.3495	488	235.786	252.214	90.3525	170.558	1010	488	522	187	353	0.2597	1.07	0.5582	0.155	-2.1265
Initial tillering	N0	1	L3	300	57180	391	925	534	421	452	538	555	498	0.4227	0.577	0.4961	1.366	0.3071	0.2004	0.5805	0.9176	107.078	319.928	0.3569	5.1755	2.1877	2.9878	2.0702	2.389	0.5773	0.6929	0.4	1.1541	0.4616	391	165.277	225.723	156.4	180.494	925	391	534	370	427	0.1932	1.366	2.2561	0.595	-7.4912
Initial tillering	N0	2	L1	600	49605	542	1025	483	584	629	739	867	694	0.5288	0.471	0.0842	0.891	0.6729	0.3147	0.9317	1.3596	102.701	207.509	0.1712	4.2878	2.2673	2.0205	0.661	1.385	0.4712	0.3271	0.1541	2.0949	0.3229	542	286.599	255.401	83.5473	175.026	1025	542	483	158	331	0.2332	0.891	0.4862	0.101	-1.9133
Initial tillering	N0	2	L2	400	43698	498	987	489	536	575	679	809	668	0.5046	0.495	0.1196	0.982	0.636	0.3476	0.7975	1.2338	89.3626	173.362	0.2234	3.9157	1.9757	1.94	0.7062	1.266	0.4954	0.364	0.1803	1.7921	0.3232	498	251.27	246.73	89.8116	160.954	987	498	489	178	319	0.2554	0.982	0.5723	0.144	-2.2624
Initial tillering	N0	2	L3	290	47584	445	1017	572	479	509	602	678	611	0.4376	0.562	0.3903	1.285	0.4073	0.2902	0.5245	0.9149	83.1887	186.847	0.2869	3.9934	1.7474	2.2461	1.3311	1.594	0.5624	0.5927	0.3333	1.1976	0.3992	445	194.715	250.285	148.333	177.65	1017	445	572	339	406	0.2504	1.285	1.4549	0.468	-6.0597
Initial tillering	N0	3	L1	500	19689	458	1137	679	526	598	810	1039	890	0.4028	0.597	0.0616	1.483	0.8557	0.6362	1.0604	1.728	28.9969	58.5595	0.058	3.3817	1.3622	2.0195	0.2915	0.735	0.5972	0.1443	0.0862	2.5204	0.2172	458	184.489	273.511	39.4758	99.4952	1137	458	679	98	247	0.2957	1.483	0.1687	0.074	-1.6577
Initial tillering	N0	3	L2	600	56960	482	1001	519	525	568	681	791	632	0.4815	0.518	0.1473	1.077	0.5954	0.289	0.8285	1.2781	109.749	235.599	0.1829	4.1404	1.9937	2.1467	0.8686	1.526	0.5185	0.4046	0.2098	1.7571	0.3686	482	232.092	249.908	101.119	177.68	1001	482	519	210	369	0.2415	1.077	0.6796	0.177	-2.3208
Initial tillering	N0	3	L3	600	54041	382	1276	894	426	471	609	699	792	0.2994	0.701	1.042	2.34	0.3546	0.4586	0.5034	0.8464	60.4487	144.289	0.1007	3.4069	1.0199	2.387	1.5406	1.292	0.7006	0.6454	0.4522	0.8388	0.3793	382	114.361	267.639	172.738	144.897	1276	382	894	577	484	0.2935	2.34	1.8202		5.2043
Initial tillering	N0	4	L1	280	14761	395	1194	799	467	535	770	1038	943	0.3308	0.669	0.1408	2.023	0.8048	0.6859	0.8511	1.5645	18.4742	35.9142	0.066	2.9051	0.9611	1.944	0.3796	0.611	0.6692	0.1952	0.1307	1.609	0.2102	395	130.674	264.326	51.608	83.036	1194	395	799	156	251	0.3442	2.023	0.2426	0.169	-2.6421
Initial tillering	N0	4	L2	500	47506	491	1131	640	537	589	715	887	697	0.4341	0.566	0.2009	1.303	0.6188	0.3219	0.8125	1.1667	74.2286	139.96	0.1485	3.3321	1.4465	1.8855	0.7189	1.279	0.5659	0.3812	0.2157	1.7787	0.3837	491	213.157	277.843	105.927	188.412	1131	491	640	244	434	0.3001	1.303	0.6162	0.241	-2.2842
Initial tillering	N0	4	L3	500	47040	396	1117	721	435	474	596	759	664	0.3545	0.645	0.5259	1.821	0.5035	0.3717	0.5409	0.9246	65.2429	119.822	0.1305	2.8452	1.0087	1.8365	0.9119	1.154	0.6455	0.4965	0.3205	1.2654	0.4056	396	140.39	255.61	126.918	160.598	1117	396	721	358	453	0.3515	1.821	0.9862	0.631	-4.7684
Initial tillering	N0	5	L1	300	19121	452	1193	741	512	576	770	1019	901	0.3789	0.621	0.1393	1.639	0.7652	0.6059	0.8637	1.4305	25.8046	48.2415	0.086	3.0099	1.1404	1.8695	0.439	0.737	0.6211	0.2348	0.1459	1.6782	0.2448	452	171.252	280.748	65.9246	110.632	1193	452	741	174	292	0.3322	1.639	0.3069	0.167	-2.4746
Initial tillering	N0	5	L2	300	25229	388	1151	763	430	469	608	871	811	0.3371	0.663	0.4148	1.966	0.633	0.5544	0.5111	0.9611	33.0661	50.2039	0.1102	2.2904	0.7721	1.5183	0.5572	0.677	0.6629	0.367	0.2433	1.2143	0.2954	388	130.794	257.206	94.3875	114.613	1151	388	763	280	340	0.4366	1.966	0.5797	0.498	-5.6667
Initial tillering	N0	5	L3	400	28561	494	1103	609	532	574	694	915	778	0.4479	0.552	0.16	1.233	0.6913	0.4663	0.6897	1.0947	46.8979	74.2642	0.1172	2.868	1.2845	1.5835	0.4888	0.845	0.5521	0.3087	0.1704	1.7287	0.2947	494	221.248	272.752	84.1995	145.558	1103	494	609	188	325	0.3487	1.233	0.4466	0.192	-2.3723
Initial tillering	N0	6	L1	400	20352	456	1228	772	531	609	842	1070	938	0.3713	0.629	0.1089	1.693	0.7953	0.6244	1.0104	1.6667	26.3631	55.245	0.0659	3.3333	1.2378	2.0955	0.4289	0.787	0.6287	0.2047	0.1287	1.8354	0.2362	456	169.329	286.671	58.671	107.687	1228	456	772	158	290	0.3	1.693	0.2573	0.131	-2.197
Initial tillering	N0	6	L2	500	54343	508	1097	589	550	593	720	846	646	0.4631	0.537	0.1843	1.159	0.5739	0.2343	0.7301	1.1998	92.2634	192.898	0.1845	3.8939	1.8032	2.0907	0.891	1.601	0.5369	0.4261	0.2288	1.7968	0.4111	508	235.245	272.755	116.233	208.85	1097	508	589	251	451	0.2568	1.159	0.7426	0.221	-2.255
Initial tillering	N0	6	L3	300	40450	539	1157	618	587	642	765	904	739	0.4659	0.534	0.1714	1.147	0.5906	0.3236	0.89	1.219	65.4534	135.091	0.2182	3.864	1.8001	2.0639	0.8449	1.396	0.5341	0.4094	0.2187	1.6522	0.3613	539	251.099	287.901	117.863	194.73	1157	539	618	253	418	0.2588	1.147	0.6932	0.206	-2.5333
Initial tillering	N1	1	L1	400	51450	543	1085	542	593	653	788	898	716	0.5005	0.5	0.0951	0.998	0.655	0.3192	1.107	1.5068	94.9264	218.375	0.2373	4.6052	2.3047	2.3005	0.7937	1.566	0.4995	0.345	0.1724	1.9733	0.3401	543	271.75	271.25	93.5862	184.67	1085	543	542	187	369	0.2171	0.998	0.5268	0.114	-2.0275
Initial tillering	N1	1	L2	400	69525	417	1098	681	449	484	578	658	590	0.3798	0.62	0.692	1.633	0.3539	0.254	0.514	0.7881	102.093	227.344	0.2552	3.5904	1.3636	2.2268	1.4388	1.661	0.6202	0.6461	0.4007	1.1545	0.4627	417	158.369	258.631	167.104	192.929	1098	417	681	440	508	0.2785	1.633	1.8257	0.83	-7.4706
Initial tillering	N1	1	L3	600	69133	419	997	578	447	478	550	589	531	0.4203	0.58	0.6227	1.379	0.2941	0.1938	0.5363	0.7555	119.607	307.227	0.1993	4.4307	1.862	2.5686	1.8131	2.071	0.5797	0.7059	0.4092	1.1422	0.4674	419	176.089	242.911	171.466	195.841	997	419	578	408	466	0.2257	1.379	2.4	0.747	-8.0345
Initial tillering	N1	2	L1	500	57858	405	1142	737	447	488	618	786	672	0.3546	0.645	0.4907	1.82	0.517	0.3623	0.5563	0.9634	78.5041	146.294	0.157	2.8876	1.024	1.8635	0.9002	1.188	0.6454	0.483	0.3117	1.3202	0.4116	405	143.63	261.37	126.252	166.681	1142	405	737	356	470	0.3463	1.82	0.9344	0.589	-4.1228
Initial tillering	N1	2	L2	400	64891	502	1116	614	546	602	718	787	611	0.4498	0.55	0.2562	1.223	0.4642	0.1775	0.9121	1.1726	105.685	266.994	0.2642	4.5918	2.0655	2.5263	1.3537	2.078	0.5502	0.5358	0.2948	1.535	0.4525	502	225.81	276.19	147.991	227.16	1116	502	614	329	505	0.2178	1.223	1.1544	0.307	-2.8693
Initial tillering	N1	2	L3	500	75102	369	1175	806	401	433	528	589	576	0.314	0.686	1.3805	2.184	0.273	0.2568	0.397	0.6576	93.1781	224.475	0.1864	3.512	1.1029	2.4091	1.7515	1.79	0.686	0.727	0.4987	1.0222	0.5098	369	115.882	253.118	184.029	188.112	1175	369	806	586	599	0.2847	2.184	2.6636	1.657	-46.0769
Initial tillering	N1	3	L1	500	36220	500	1188	688	560	626	802	1013	814	0.4209	0.579	0.1154	1.376	0.7456	0.4564	0.9593	1.4632	52.6453	103.306	0.1053	3.3884	1.4261	1.9623	0.4991	1.067	0.5791	0.2544	0.1473	2.1371	0.3148	500	210.438	289.562	73.6532	157.407	1188	500	688	175	374	0.2951	1.376	0.3411	0.139	-1.8794
Initial tillering	N1	3	L2	500	63332	462	1121	659	503	541	650	768	632	0.4121	0.588	0.3936	1.426	0.4643	0.258	0.5766	0.9509	96.1028	196.812	0.1922	3.4837	1.4357	2.0479	1.097	1.52	0.5879	0.5357	0.3149	1.3853	0.4362	462	190.405	271.595	145.483	201.533	1121	462	659	353	489	0.2871	1.426	1.1536	0.472	-3.5956
Initial tillering	N1	3	L3	500	66989	401	1061	660	435	472	564	604	536	0.3779	0.622	0.7176	1.646	0.3076	0.2045	0.5606	0.8232	101.499	271.663	0.203	4.3027	1.6262	2.6765	1.8533	2.129	0.6221	0.6924	0.4307	1.1488	0.4948	401	151.556	249.444	172.721	198.421	1061	401	660	457	525	0.2324	1.646	2.2512	0.861	-7.7206
Initial tillering	N1	4	L1	400	44944	419	1128	709	469	520	679	877	676	0.3715	0.629	0.2567	1.692	0.646	0.3625	0.7193	1.2224	63.3909	119.954	0.1585	3.0106	1.1183	1.8923	0.6699	1.206	0.6285	0.354	0.2225	1.8008	0.4007	419	155.639	263.361	93.2349	167.897	1128	419	709	251	452	0.3322	1.692	0.548	0.308	-2.2488
Initial tillering	N1	4	L2	300	41601	324	1078	754	357	385	490	685	628	0.3006	0.699	0.9634	2.327	0.4788	0.4032	0.3714	0.7339	55.1737	84.5691	0.1839	2.1914	0.6586	1.5328	0.7989	0.915	0.6994	0.5212	0.3646	1.145	0.4174	324	97.3803	226.62	118.119	135.25	1078	324	754	393	450	0.4563	2.327	1.0886	1.156	-7.8947
Initial tillering	N1	4	L3	400	40385	361	1089	728	393	425	539	736	646	0.3315	0.669	0.6684	2.017	0.5151	0.3915	0.4396	0.815	55.4733	87.7711	0.1387	2.3668	0.7846	1.5822	0.7672	0.963	0.6685	0.4849	0.3242	1.255	0.4068	361	119.67	241.33	117.018	146.853	1089	361	728	353	443	0.4225	2.017	0.9413	0.802	-4.9222
Initial tillering	N1	5	L1	400	42782	401	1141	740	440	476	597	788	691	0.3514	0.649	0.5389	1.845	0.523	0.3919	0.4865	0.8829	57.8131	97.6	0.1445	2.603	0.9148	1.6882	0.8053	1.027	0.6486	0.477	0.3094	1.2748	0.3944	401	140.93	260.07	124.061	158.151	1141	401	740	353	450	0.3842	1.845	0.9121	0.647	-4.6392
Initial tillering	N1	5	L2	300	33213	447	1128	681	493	538	692	948	756	0.3963	0.604	0.1689	1.523	0.7357	0.4537	0.6608	1.1992	48.7707	79.4998	0.1626	2.7	1.07	1.6301	0.4309	0.89	0.6037	0.2643	0.1596	2.0667	0.3298	447	177.136	269.864	71.3298	147.415	1128	447	681	180	372	0.3704	1.523	0.3593	0.203	-1.9375
Initial tillering	N1	5	L3	300	40497	320	1129	809	349	380	487	692	663	0.2834	0.717	1.1851	2.528	0.4598	0.424	0.3832	0.6881	50.0577	74.9071	0.1669	2.0883	0.5919	1.4964	0.8083	0.862	0.7166	0.5402	0.3871	1.0664	0.4128	320	90.6997	229.3	123.862	132.082	1129	320	809	437	466	0.4789	2.528	1.1747		-16.069
Initial tillering	N1	6	L1	400	35875	381	1094	713	422	461	587	785	697	0.3483	0.652	0.4574	1.871	0.5666	0.4432	0.547	0.9631	50.3154	85.5196	0.1258	2.6079	0.9082	1.6997	0.7366	0.946	0.6517	0.4334	0.2824	1.2848	0.3629	381	132.688	248.312	107.613	138.261	1094	381	713	309	397	0.3834	1.871	0.7649	0.549	-4.5114
Initial tillering	N1	6	L2	400	46771	368	1107	739	402	436	547	745	641	0.3324	0.668	0.6778	2.008	0.5101	0.3694	0.4601	0.8074	63.2897	100.167	0.1582	2.3708	0.7881	1.5827	0.7753	0.998	0.6676	0.4899	0.327	1.2873	0.421	368	122.334	245.666	120.34	154.912	1107	368	739	362	466	0.4218	2.008	0.9602	0.813	-4.4808
Initial tillering	N1	6	L3	400	45043	355	1062	707	387	421	535	728	608	0.3343	0.666	0.615	1.992	0.5276	0.3579	0.4809	0.8487	63.7097	102.482	0.1593	2.4163	0.8077	1.6086	0.7599	1.033	0.6657	0.4724	0.3145	1.3593	0.4275	355	118.668	236.332	111.648	151.761	1062	355	707	334	454	0.4139	1.992	0.8954	0.738	-3.7833
Initial tillering	N2	1	L1	500	29838	492	1081	589	550	613	775	951	773	0.4551	0.545	0.0749	1.197	0.7793	0.4771	1.0696	1.6016	50.6584	104.113	0.1013	3.7719	1.7167	2.0552	0.4536	1.075	0.5449	0.2207	0.1203	2.3692	0.2849	492	223.926	268.074	59.1674	140.181	1081	492	589	130	308	0.2651	1.197	0.2832	0.09	-1.7303
Initial tillering	N2	1	L2	600	66769	359	1177	818	393	424	536	675	599	0.305	0.695	1.1228	2.279	0.3863	0.2934	0.379	0.7213	81.6241	152.399	0.136	2.6865	0.8194	1.8671	1.1458	1.319	0.695	0.6137	0.4265	1.1514	0.4911	359	109.5	249.5	153.116	176.297	1177	359	818	502	578	0.3722	2.279	1.5886	1.347	-7.6053
Initial tillering	N2	1	L3	200	17281	302	1030	728	330	353	461	744	772	0.2932	0.707	0.7662	2.411	0.6071	0.6456	0.3159	0.728	23.7378	28.4639	0.1187	1.6965	0.4974	1.1991	0.4711	0.425	0.7068	0.3929	0.2777	0.9021	0.2505	302	88.5476	213.452	83.8563	75.6466	1030	302	728	286	258	0.5894	2.411	0.6471	0.919	9.2143
Initial tillering	N2	2	L1	400	45467	384	1171	787	425	473	618	826	743	0.3279	0.672	0.5077	2.049	0.5616	0.4562	0.6099	0.9911	57.7721	101.951	0.1444	2.6258	0.8611	1.7647	0.7736	0.96	0.6721	0.4384	0.2946	1.2406	0.3655	384	125.923	258.077	113.134	140.352	1171	384	787	345	428	0.3808	2.049	0.7805	0.609	-5.1566
Initial tillering	N2	2	L2	500	62593	426	1051	625	461	491	584	686	574	0.4053	0.595	0.5039	1.467	0.416	0.2368	0.48	0.8427	100.149	202.867	0.2003	3.4063	1.3807	2.0256	1.183	1.546	0.5947	0.584	0.3473	1.3068	0.4539	426	172.67	253.33	147.945	193.342	1051	426	625	365	477	0.2936	1.467	1.4038	0.605	-4.2589
Initial tillering	N2	2	L3	160	14640	272	892	620	287	301	358	506	679	0.3049	0.695	1.7778	2.279	0.3774	0.6565	0.2258	0.4624	23.6132	28.9278	0.1476	1.7625	0.5375	1.2251	0.7627	0.421	0.6951	0.6226	0.4327	0.5518	0.2388	272	82.9417	189.058	117.704	64.9507	892	272	620	386	213	0.5674	2.279	1.6496	2.133	1.2312
Initial tillering	N2	3	L1	500	33478	333	1222	889	370	403	557	872	795	0.2725	0.727	0.7587	2.67	0.6063	0.5197	0.3712	0.8399	37.6576	52.1664	0.0753	1.9042	0.5189	1.3853	0.5454	0.665	0.7275	0.3937	0.2864	1.22	0.3494	333	90.7439	242.256	95.3764	116.359	1222	333	889	350	427	0.5252	2.67	0.6494	0.91	-5.5455
Initial tillering	N2	3	L2	500	54176	363	1037	674	398	433	543	664	589	0.35	0.65	0.6252	1.857	0.4466	0.3353	0.5193	0.8902	80.3791	160.224	0.1608	3.0669	1.0736	1.9934	1.1031	1.325	0.65	0.5534	0.3597	1.2011	0.432	363	127.067	235.933	130.568	156.822	1037	363	674	373	448	0.3261	1.857	1.2392	0.75	-5.9733
Initial tillering	N2	3	L3	600	56044	371	1102	731	404	435	545	690	600	0.3367	0.663	0.7737	1.97	0.4364	0.3133	0.4241	0.7934	76.6677	139.396	0.1278	2.741	0.9228	1.8182	1.0247	1.249	0.6633	0.5636	0.3739	1.2184	0.4555	371	124.901	246.099	138.704	169.004	1102	371	731	412	502	0.3648	1.97	1.2915	0.928	-5.5778
Initial tillering	N2	4	L1	300	37541	332	1108	776	364	397	513	725	677	0.2996	0.7	0.866	2.337	0.5064	0.4446	0.4253	0.7775	48.3777	74.2694	0.1613	2.192	0.6568	1.5352	0.7577	0.853	0.7004	0.4936	0.3457	1.1253	0.389	332	99.4801	232.52	114.762	129.144	1108	332	776	383	431	0.4562	2.337	0.9746	1.039	-8.9792
Initial tillering	N2	4	L2	280	23662	336	1155	819	368	399	532	822	806	0.2909	0.709	0.7341	2.438	0.5934	0.5739	0.3785	0.7977	28.8914	38.839	0.1032	1.8958	0.5515	1.3443	0.5466	0.573	0.7091	0.4066	0.2883	1.048	0.3022	336	97.7455	238.255	96.8727	101.527	1155	336	819	333	349	0.5275	2.438	0.6852	0.881	-21.8125
Initial tillering	N2	4	L3	300	38641	285	1140	855	305	323	402	613	693	0.25	0.75	2.5337	3	0.3836	0.4772	0.2105	0.4561	45.1937	53.7364	0.1506	1.5854	0.3963	1.189	0.7329	0.622	0.75	0.6164	0.4623	0.8482	0.3921	285	71.25	213.75	131.75	111.75	1140	285	855	527	447	0.6308	3	1.6067		5.5875
Initial tillering	N2	5	L1	400	43110	367	1082	715	408	448	576	766	650	0.3392	0.661	0.4866	1.948	0.558	0.3958	0.5594	0.9744	60.2934	105.274	0.1507	2.6422	0.8962	1.746	0.7717	1.055	0.6608	0.442	0.2921	1.3671	0.3993	367	124.481	242.518	107.183	146.529	1082	367	715	316	432	0.3785	1.948	0.792	0.584	-3.7241
Initial tillering	N2	5	L2	300	38859	317	1118	801	342	365	456	676	669	0.2835	0.716	1.4392	2.527	0.4482	0.4395	0.2871	0.5784	48.5137	62.6128	0.1617	1.8014	0.5108	1.2906	0.7122	0.723	0.7165	0.5518	0.3953	1.0158	0.4016	317	89.8828	227.117	125.326	127.31	1118	317	801	442	449	0.5551	2.527	1.2312	1.727	-64.1429
Initial tillering	N2	5	L3	290	33367	316	1213	897	341	365	473	730	760	0.2605	0.739	1.6144	2.839	0.4615	0.495	0.2676	0.5834	37.1986	47.0224	0.1283	1.7094	0.4453	1.2641	0.6807	0.638	0.7395	0.5385	0.3982	0.9379	0.3735	316	82.3215	233.679	125.827	118.011	1213	316	897	483	453	0.585	2.839	1.1667	1.937	15.1
Initial tillering	N2	6	L1	300	18705	321	1216	895	375	425	630	942	891	0.264	0.736	0.4549	2.788	0.6939	0.6369	0.5587	1.1508	20.8997	34.6645	0.0697	2.2535	0.5949	1.6586	0.5078	0.602	0.736	0.3061	0.2253	1.1861	0.2673	321	84.7377	236.262	72.3306	85.7936	1216	321	895	274	325	0.4438	2.788	0.4412	0.546	-6.3725
Initial tillering	N2	6	L2	400	41280	399	1119	720	434	471	589	807	691	0.3566	0.643	0.4767	1.805	0.5667	0.4056	0.5139	0.8796	57.3335	88.9982	0.1433	2.4125	0.8602	1.5523	0.6727	0.923	0.6434	0.4333	0.2788	1.3718	0.3825	399	142.271	256.729	111.249	152.611	1119	399	720	312	428	0.4145	1.805	0.7647	0.572	-3.6897
Initial tillering	N2	6	L3	300	32142	296	1217	921	328	352	461	710	807	0.2432	0.757	1.8088	3.111	0.4495	0.5548	0.2606	0.5972	34.8995	46.364	0.1163	1.7555	0.427	1.3285	0.7313	0.591	0.7568	0.5505	0.4166	0.8087	0.3369	296	71.9934	224.007	123.313	99.7206	1217	296	921	507	410	0.5696	3.111	1.2246	2.171	4.2268
Growth stage	Nitrogen level	Sample No.	Leaf position	t for Fm	Area	Fo	Fm	Fv	F1	F2	F3	F4	F5	Fo/Fm	Fv/Fm	PI Inst.	Fv/Fo	Vj	Vi	dVG/dto	dV/dto	Sm	N	Sm/t(Fm)	ABS/RC	DIo/RC	TRo/RC	ETo/RC	REo/RC	phi(Po)	psi(Eo)	phi(Eo)	delta(Ro)	phi(Ro)	ABS/CSo	DIo/CSo	TRo/CSo	ETo/CSo	REo/CSo	ABS/CSm	DIo/CSm	TRo/CSm	ETo/CSm	REo/CSm	gamma(RC)/((1-gamma(RC))	phi(Po)/((1-phi(Po))	psi(Eo)/(1-psi(Eo))	PI abs	dRo/(1-dRo)
Tillering	N0	1	L1	400	22984	314	1393	1079	348	377	519	827	1064	0.2254	0.775	1.8372	3.436	0.4754	0.6951	0.2688	0.6333	21.3009	28.3735	0.0533	1.7197	0.3876	1.332	0.6987	0.406	0.7746	0.5246	0.4063	0.5813	0.2362	314	70.7796	243.22	127.584	74.1608	1393	314	1079	566	329	0.5815	3.436	1.1033	2.205	1.3882
Tillering	N0	1	L2	300	30689	277	1320	1043	302	327	431	657	899	0.2098	0.79	3.2022	3.765	0.3643	0.5964	0.2397	0.4922	29.4237	39.7479	0.0981	1.7096	0.3588	1.3509	0.8587	0.545	0.7902	0.6357	0.5023	0.635	0.3189	277	58.128	218.872	139.13	88.3462	1320	277	1043	663	421	0.5849	3.765	1.7447	3.843	1.7397
Tillering	N0	1	L3	400	29323	307	1396	1089	339	369	502	804	1039	0.2199	0.78	2.1002	3.547	0.4564	0.6722	0.2755	0.5969	26.9269	35.2163	0.0673	1.6765	0.3687	1.3078	0.711	0.429	0.7801	0.5436	0.4241	0.603	0.2557	307	67.5136	239.486	130.189	78.5093	1396	307	1089	592	357	0.5965	3.547	1.1911	2.52	1.5191
Tillering	N0	2	L1	270	31907	293	1342	1049	327	360	492	785	906	0.2183	0.782	1.9583	3.58	0.469	0.5844	0.3146	0.6323	30.417	41.0093	0.1127	1.7248	0.3766	1.3482	0.7159	0.56	0.7817	0.531	0.4151	0.7828	0.3249	293	63.9709	229.029	121.61	95.1923	1342	293	1049	557	436	0.5798	3.58	1.1321	2.35	3.6033
Tillering	N0	2	L2	600	39001	519	747	228	540	567	615	624	538	0.6948	0.305	0.0429	0.439	0.4605	0.0833	1.1842	1.4035	171.056	521.315	0.2851	9.985	6.9373	3.0476	1.6441	2.794	0.3052	0.5395	0.1647	1.6992	0.2798	519	360.59	158.41	85.4578	145.209	747	519	228	123	209	0.1002	0.439	1.1714	0.052	-2.4302
Tillering	N0	2	L3	170	11489	331	1175	844	368	403	553	879	1010	0.2817	0.718	0.6105	2.55	0.6493	0.8045	0.4147	0.8768	13.6127	18.3821	0.0801	1.88	0.5296	1.3504	0.4736	0.264	0.7183	0.3507	0.2519	0.5574	0.1404	331	93.2434	237.757	83.3838	46.4809	1175	331	844	296	165	0.5319	2.55	0.5401	0.733	1.2595
Tillering	N0	3	L1	300	30348	458	1074	616	496	537	658	824	760	0.4264	0.574	0.2411	1.345	0.5942	0.4903	0.6656	1.0823	49.2657	89.7371	0.1642	3.1758	1.3543	1.8215	0.7392	0.928	0.5736	0.4058	0.2328	1.256	0.2924	458	195.311	262.689	106.611	133.903	1074	458	616	250	314	0.3149	1.345	0.6831	0.289	-4.9063
Tillering	N0	3	L2	300	41200	417	1075	658	456	494	605	725	691	0.3879	0.612	0.4495	1.578	0.4681	0.4164	0.5775	0.9524	62.614	127.396	0.2087	3.3241	1.2894	2.0346	1.0823	1.187	0.6121	0.5319	0.3256	1.0971	0.3572	417	161.757	255.243	135.767	148.956	1075	417	658	350	384	0.3008	1.578	1.1364	0.539	-11.2941
Tillering	N0	3	L3	500	25761	634	1333	699	710	787	1024	1256	1074	0.4756	0.524	0.0285	1.103	0.8898	0.6295	1.1016	1.8598	36.8547	77.0276	0.0737	3.9857	1.8957	2.09	0.2302	0.774	0.5244	0.1102	0.0578	3.3636	0.1943	634	301.542	332.458	36.6227	123.185	1333	634	699	77	259	0.2509	1.103	0.1238	0.034	-1.4231
Tillering	N0	4	L1	280	19885	482	886	404	512	544	626	709	674	0.544	0.456	0.1174	0.838	0.5619	0.4752	0.7921	1.1881	49.2212	104.08	0.1758	4.6373	2.5228	2.1145	0.9264	1.11	0.456	0.4381	0.1998	1.1977	0.2393	482	262.217	219.783	96.2912	115.332	886	482	404	177	212	0.2156	0.838	0.7797	0.141	-6.0571
Tillering	N0	4	L2	300	45180	424	941	517	455	492	573	584	549	0.4506	0.549	0.4013	1.219	0.3095	0.2418	0.7157	0.9607	87.388	271.267	0.2913	5.6499	2.5458	3.1042	2.1435	2.354	0.5494	0.6905	0.3794	1.098	0.4166	424	191.048	232.952	160.859	176.629	941	424	517	357	392	0.177	1.219	2.2312	0.482	-11.2
Tillering	N0	4	L3	300	19683	493	1064	571	552	616	786	947	799	0.4633	0.537	0.0621	1.158	0.7951	0.5359	1.1208	1.7104	34.4716	74.157	0.1149	4.0086	1.8574	2.1512	0.4408	0.998	0.5367	0.2049	0.11	2.265	0.2491	493	228.429	264.57	54.2115	122.787	1064	493	571	117	265	0.2495	1.158	0.2577	0.074	-1.7905
Tillering	N0	5	L1	400	61025	496	1015	519	527	563	635	639	587	0.4887	0.511	0.3618	1.046	0.2755	0.1753	0.6936	0.8927	117.582	380.977	0.294	6.3366	3.0965	3.2401	2.3474	2.672	0.5113	0.7245	0.3704	1.1383	0.4217	496	242.38	253.62	183.74	209.151	1015	496	519	376	428	0.1578	1.046	2.6294	0.434	-8.2308
Tillering	N0	5	L2	290	45161	384	1048	664	419	455	556	669	628	0.3664	0.634	0.6035	1.729	0.4292	0.3675	0.5422	0.8635	68.0142	136.824	0.2345	3.1751	1.1634	2.0117	1.1482	1.272	0.6336	0.5708	0.3616	1.1082	0.4008	384	140.702	243.298	138.87	153.893	1048	384	664	379	420	0.315	1.729	1.3298	0.724	-10.2439
Tillering	N0	5	L3	300	47695	617	949	332	656	702	794	790	595	0.6502	0.35	0.0423	0.538	0.5211	-0.0663	1.3855	1.7771	143.659	489.936	0.4789	9.7484	6.338	3.4104	1.6333	3.636	0.3498	0.4789	0.1675	2.2264	0.373	617	401.147	215.852	103.375	230.156	949	617	332	159	354	0.1026	0.538	0.9191	0.051	-1.8154
Tillering	N0	6	L1	300	51333	338	1084	746	368	398	483	530	554	0.3118	0.688	1.4508	2.207	0.2574	0.2895	0.4021	0.6479	68.8105	173.221	0.2294	3.6579	1.1406	2.5174	1.8695	1.788	0.6882	0.7426	0.5111	0.9567	0.4889	338	105.391	232.609	172.742	165.258	1084	338	746	554	530	0.2734	2.207	2.8854	1.741	22.0833
Tillering	N0	6	L2	300	39810	552	960	408	582	618	697	741	610	0.575	0.425	0.1186	0.739	0.4632	0.1422	0.8824	1.1846	97.5742	249.528	0.3252	6.0172	3.4599	2.5573	1.3727	2.194	0.425	0.5368	0.2281	1.5982	0.3646	552	317.4	234.6	125.925	201.25	960	552	408	219	350	0.1662	0.739	1.1587	0.142	-2.6718
Tillering	N0	6	L3	400	64808	466	1218	752	516	571	703	758	675	0.3826	0.617	0.4835	1.614	0.3883	0.2779	0.7314	1.0505	86.1812	233.161	0.2155	4.382	1.6765	2.7055	1.6549	1.954	0.6174	0.6117	0.3777	1.1804	0.4458	466	178.289	287.711	175.993	207.749	1218	466	752	460	543	0.2282	1.614	1.5753	0.58	-6.5422
Tillering	N1	1	L1	400	35354	289	1450	1161	313	333	425	692	1006	0.1993	0.801	4.482	4.017	0.3471	0.6176	0.1723	0.3905	30.4509	34.2541	0.0761	1.4049	0.28	1.1249	0.7344	0.43	0.8007	0.6529	0.5228	0.5858	0.3062	289	57.6007	231.399	151.077	88.4938	1450	289	1161	758	444	0.7118	4.017	1.8809	5.378	1.414
Tillering	N1	1	L2	400	35168	365	1239	874	410	457	610	857	817	0.2946	0.705	0.6584	2.395	0.5629	0.5172	0.5378	0.9344	40.2377	66.7902	0.1006	2.3531	0.6932	1.6599	0.7255	0.801	0.7054	0.4371	0.3083	1.1047	0.3406	365	107.526	257.474	112.534	124.318	1239	365	874	382	422	0.425	2.395	0.7764	0.79	-10.55
Tillering	N1	1	L3	500	59068	488	923	435	517	548	629	664	552	0.5287	0.471	0.1929	0.891	0.4046	0.1471	0.7126	1.0805	135.788	362.615	0.2716	5.6663	2.9958	2.6705	1.59	2.278	0.4713	0.5954	0.2806	1.4324	0.402	488	258.011	229.989	136.936	196.152	923	488	435	259	371	0.1765	0.891	1.4716	0.232	-3.3125
Tillering	N1	2	L1	300	35210	317	1249	932	348	377	503	773	813	0.2538	0.746	1.4036	2.94	0.4893	0.5322	0.3112	0.6652	37.7785	51.3656	0.1259	1.8221	0.4625	1.3596	0.6944	0.636	0.7462	0.5107	0.3811	0.916	0.3491	317	80.4556	236.544	120.81	110.658	1249	317	932	476	436	0.5488	2.94	1.0439	1.684	10.9
Tillering	N1	2	L2	600	66972	430	1084	654	460	494	582	675	609	0.3967	0.603	0.6173	1.521	0.3746	0.2737	0.5199	0.7747	102.404	211.774	0.1707	3.4277	1.3597	2.068	1.2933	1.502	0.6033	0.6254	0.3773	1.1614	0.4382	430	170.572	259.428	162.242	188.423	1084	430	654	409	475	0.2917	1.521	1.6694	0.741	-7.197
Tillering	N1	2	L3	260	23668	418	1340	922	469	519	704	1031	964	0.3119	0.688	0.4099	2.206	0.6649	0.5922	0.5423	1.034	25.6699	39.9216	0.0987	2.2603	0.7051	1.5552	0.5212	0.634	0.6881	0.3351	0.2306	1.2168	0.2806	418	130.391	287.609	96.3896	117.29	1340	418	922	309	376	0.4424	2.206	0.5041	0.492	-5.6119
Tillering	N1	3	L1	280	31286	363	1329	966	393	422	534	796	906	0.2731	0.727	1.5073	2.661	0.4482	0.5621	0.3002	0.5901	32.3872	42.6345	0.1157	1.8111	0.4947	1.3164	0.7263	0.576	0.7269	0.5518	0.4011	0.7936	0.3183	363	99.149	263.851	145.582	115.537	1329	363	966	533	423	0.5522	2.661	1.2309	1.809	3.8455
Tillering	N1	3	L2	400	54861	507	998	491	541	580	671	720	578	0.508	0.492	0.2019	0.968	0.4338	0.1446	0.7943	1.1134	111.732	286.762	0.2793	5.2167	2.6501	2.5665	1.4531	2.195	0.492	0.5662	0.2786	1.5108	0.4208	507	257.564	249.436	141.228	213.367	998	507	491	278	420	0.1917	0.968	1.3052	0.242	-2.9577
Tillering	N1	3	L3	400	56856	521	1007	486	561	600	705	749	610	0.5174	0.483	0.1578	0.933	0.4691	0.1831	0.8025	1.262	116.987	314.702	0.2925	5.5738	2.8838	2.6901	1.4281	2.197	0.4826	0.5309	0.2562	1.5388	0.3942	521	269.554	251.446	133.484	205.399	1007	521	486	258	397	0.1794	0.933	1.1316	0.189	-2.8561
Tillering	N1	4	L1	300	30732	414	1044	630	448	484	591	736	712	0.3966	0.603	0.3995	1.522	0.5111	0.473	0.5714	0.9365	48.7807	89.3808	0.1626	3.0364	1.2041	1.8323	0.8958	0.966	0.6034	0.4889	0.295	1.0779	0.318	414	164.172	249.828	122.138	131.655	1044	414	630	308	332	0.3293	1.522	0.9565	0.479	-13.8333
Tillering	N1	4	L2	300	52088	479	976	497	514	551	636	676	558	0.4908	0.509	0.2524	1.038	0.3964	0.159	0.7445	1.053	104.806	278.418	0.3494	5.2168	2.5603	2.6565	1.6035	2.234	0.5092	0.6036	0.3074	1.3933	0.4283	479	235.083	243.917	147.234	205.145	976	479	497	300	418	0.1917	1.038	1.5228	0.303	-3.5424
Tillering	N1	4	L3	600	35270	379	1337	958	427	474	647	907	916	0.2835	0.717	0.7265	2.528	0.5511	0.5605	0.4906	0.9325	36.8162	62.29	0.0614	2.3613	0.6694	1.6919	0.7594	0.744	0.7165	0.4489	0.3216	0.9791	0.3149	379	107.435	271.565	121.892	119.341	1337	379	958	430	421	0.4235	2.528	0.8144	0.872	46.7778
Tillering	N1	5	L1	600	43602	442	854	412	477	512	598	619	565	0.5176	0.482	0.1694	0.932	0.4296	0.2985	0.8495	1.2621	105.83	310.913	0.1764	6.0896	3.1518	2.9379	1.6757	2.061	0.4824	0.5704	0.2752	1.2298	0.3384	442	228.763	213.237	121.628	149.576	854	442	412	235	289	0.1642	0.932	1.3277	0.203	-5.3519
Tillering	N1	5	L2	400	67290	519	1059	540	558	604	703	735	579	0.4901	0.51	0.2336	1.04	0.4	0.1111	0.8519	1.1358	124.611	353.835	0.3115	5.5686	2.7291	2.8395	1.7037	2.524	0.5099	0.6	0.3059	1.4815	0.4533	519	254.354	264.646	158.787	235.241	1059	519	540	324	480	0.1796	1.04	1.5	0.28	-3.0769
Tillering	N1	5	L3
Tillering	N1	6	L1	300	36099	398	1221	823	438	479	613	799	807	0.326	0.674	0.6839	2.068	0.4872	0.497	0.4982	0.8708	43.8628	78.3916	0.1462	2.6515	0.8643	1.7872	0.9164	0.899	0.674	0.5128	0.3456	0.981	0.3391	398	129.733	268.267	137.556	134.948	1221	398	823	422	414	0.3771	2.068	1.0524	0.821	51.75
Tillering	N1	6	L2	400	54170	550	1039	489	589	633	726	769	628	0.5294	0.471	0.1605	0.889	0.4479	0.1595	0.8998	1.1997	110.778	296.757	0.2769	5.6919	3.013	2.6788	1.4791	2.252	0.4706	0.5521	0.2599	1.5222	0.3956	550	291.145	258.855	142.926	217.565	1039	550	489	270	411	0.1757	0.889	1.2329	0.193	-2.9149
Tillering	N1	6	L3	300	63309	417	1097	680	456	493	603	636	584	0.3801	0.62	0.6263	1.631	0.3221	0.2456	0.5441	0.9118	93.1009	263.573	0.3103	4.5672	1.7361	2.8311	1.9193	2.136	0.6199	0.6779	0.4202	1.1128	0.4676	417	158.513	258.487	175.239	195.006	1097	417	680	461	513	0.219	1.631	2.105	0.752	-9.8654
Tillering	N2	1	L1	290	26097	458	1051	593	490	524	633	831	743	0.4358	0.564	0.2296	1.295	0.629	0.4806	0.5734	0.9837	44.0089	68.8254	0.1518	2.7718	1.2079	1.5639	0.5802	0.812	0.5642	0.371	0.2093	1.4	0.2931	458	199.585	258.415	95.8706	134.219	1051	458	593	220	308	0.3608	1.295	0.5898	0.276	-3.5
Tillering	N2	1	L2	300	33749	415	1193	778	459	500	649	921	779	0.3479	0.652	0.3553	1.875	0.6504	0.4679	0.527	1.0026	43.3794	66.8695	0.1446	2.3638	0.8223	1.5415	0.5389	0.82	0.6521	0.3496	0.228	1.5221	0.347	415	144.363	270.637	94.6186	144.015	1193	415	778	272	414	0.4231	1.875	0.5375	0.426	-2.9155
Tillering	N2	1	L3	230	12779	445	1191	746	514	581	814	1084	936	0.3736	0.626	0.0761	1.676	0.8566	0.6582	0.8981	1.6488	17.1303	32.9738	0.0745	3.0731	1.1482	1.9249	0.2761	0.658	0.6264	0.1434	0.0898	2.3832	0.2141	445	166.268	278.732	39.979	95.2771	1191	445	746	107	255	0.3254	1.676	0.1674	0.091	-1.723
Tillering	N2	2	L1	300	27444	289	1278	989	315	339	455	736	894	0.2261	0.774	2.1617	3.422	0.452	0.6117	0.2427	0.5595	27.7489	34.3498	0.0925	1.5996	0.3617	1.2379	0.6784	0.481	0.7739	0.548	0.4241	0.7085	0.3005	289	65.3529	223.647	122.565	86.8357	1278	289	989	542	384	0.6252	3.422	1.2125	2.594	2.4304
Tillering	N2	2	L2	500	32070	329	1429	1100	364	394	535	866	988	0.2302	0.77	1.7585	3.343	0.4882	0.5991	0.2727	0.6242	29.1546	37.2802	0.0583	1.6612	0.3825	1.2787	0.6545	0.513	0.7698	0.5118	0.394	0.7833	0.3086	329	75.746	253.254	129.62	101.532	1429	329	1100	563	441	0.602	3.343	1.0484	2.11	3.6148
Tillering	N2	2	L3	600	33909	456	1021	565	497	538	656	821	704	0.4466	0.553	0.1714	1.239	0.646	0.4389	0.7257	1.1799	60.0153	109.617	0.1	3.3006	1.4741	1.8265	0.6465	1.025	0.5534	0.354	0.1959	1.585	0.3105	456	203.659	252.341	89.3242	141.579	1021	456	565	200	317	0.303	1.239	0.5479	0.206	-2.7094
Tillering	N2	3	L1	280	30243	338	1296	958	366	394	512	750	883	0.2608	0.739	1.6436	2.834	0.4301	0.5689	0.2923	0.6054	31.5686	44.4412	0.1127	1.9045	0.4967	1.4078	0.8023	0.607	0.7392	0.5699	0.4213	0.7564	0.3187	338	88.1512	249.849	142.398	107.711	1296	338	958	546	413	0.5251	2.834	1.3252	1.972	3.1053
Tillering	N2	3	L2	300	22415	380	1416	1036	429	476	674	1049	1056	0.2684	0.732	0.6225	2.726	0.6458	0.6525	0.4537	0.9459	21.6362	31.6943	0.0721	2.0022	0.5373	1.4649	0.5189	0.509	0.7316	0.3542	0.2592	0.9809	0.2542	380	101.977	278.023	98.4887	96.6102	1416	380	1036	367	360	0.4995	2.726	0.5486	0.747	51.4286
Tillering	N2	3	L3	300	29332	366	1276	910	397	425	542	815	873	0.2868	0.713	1.1611	2.486	0.4934	0.5571	0.3077	0.6447	32.2329	42.1157	0.1074	1.8321	0.5255	1.3066	0.6619	0.579	0.7132	0.5066	0.3613	0.8742	0.3158	366	104.981	261.019	132.23	115.594	1276	366	910	461	403	0.5458	2.486	1.0267	1.393	6.9483
Tillering	N2	4	L1	300	35280	556	853	297	584	616	677	696	580	0.6518	0.348	0.0603	0.534	0.4714	0.0808	1.0774	1.358	118.789	342.225	0.396	8.2743	5.3933	2.881	1.5229	2.648	0.3482	0.5286	0.1841	1.7389	0.32	556	362.41	193.59	102.335	177.946	853	556	297	157	273	0.1209	0.534	1.1214	0.072	-2.3534
Tillering	N2	4	L2	500	30920	393	1221	828	451	505	692	950	828	0.3219	0.678	0.3237	2.107	0.6727	0.5254	0.6522	1.2037	37.3427	66.8191	0.0747	2.6386	0.8493	1.7893	0.5856	0.849	0.6781	0.3273	0.2219	1.4502	0.3219	393	126.494	266.506	87.226	126.494	1221	393	828	271	393	0.379	2.107	0.4865	0.388	-3.2213
Tillering	N2	4	L3	900	40192	284	1149	865	305	328	424	689	807	0.2472	0.753	1.8835	3.046	0.4682	0.6046	0.2659	0.5395	46.4648	53.5397	0.0516	1.5306	0.3783	1.1523	0.6128	0.456	0.7528	0.5318	0.4003	0.7435	0.2977	284	70.1967	213.803	113.699	84.5326	1149	284	865	460	342	0.6533	3.046	1.1358	2.26	2.8983
Tillering	N2	5	L1	500	39987	328	1242	914	361	392	512	740	797	0.2641	0.736	1.3987	2.787	0.4508	0.5131	0.3392	0.671	43.7496	65.1289	0.0875	2.0229	0.5342	1.4887	0.8176	0.725	0.7359	0.5492	0.4042	0.8865	0.3583	328	86.6216	241.378	132.573	117.52	1242	328	914	502	445	0.4943	2.787	1.2184	1.678	7.807
Tillering	N2	5	L2
Tillering	N2	5	L3	300	36509	467	1110	643	508	551	676	834	732	0.4207	0.579	0.2633	1.377	0.5708	0.4121	0.6687	1.0835	56.7787	107.782	0.1893	3.277	1.3787	1.8983	0.8148	1.116	0.5793	0.4292	0.2486	1.3696	0.3405	467	196.477	270.523	116.119	159.032	1110	467	643	276	378	0.3052	1.377	0.752	0.316	-3.7059
Tillering	N2	6	L1	400	9513	133	224	91	138	145	160	188	154	0.5938	0.406	0.0927	0.684	0.6044	0.2308	0.7692	0.989	104.537	171.061	0.2613	4.028	2.3916	1.6364	0.6474	1.259	0.4063	0.3956	0.1607	1.9444	0.3125	133	78.9688	54.0313	21.375	41.5625	224	133	91	36	70	0.2483	0.684	0.6545	0.316	-2.0588
Tillering	N2	6	L2	400	51527	559	1084	525	607	665	788	903	689	0.5157	0.484	0.0899	0.939	0.6552	0.2476	1.1048	1.454	98.1464	217.786	0.2454	4.5817	2.3627	2.219	0.765	1.67	0.4843	0.3448	0.167	2.1823	0.3644	559	288.267	270.733	93.3386	203.695	1084	559	525	181	395	0.2183	0.939	0.5262	0.108	-1.8458
Tillering	N2	6	L3
Growth stage	Nitrogen level	Sample No.	Leaf position	t for Fm	Area	Fo	Fm	Fv	F1	F2	F3	F4	F5	Fo/Fm	Fv/Fm	PI Inst.	Fv/Fo	Vj	Vi	dVG/dto	dV/dto	Sm	N	Sm/t(Fm)	ABS/RC	DIo/RC	TRo/RC	ETo/RC	REo/RC	phi(Po)	psi(Eo)	phi(Eo)	delta(Ro)	phi(Ro)	ABS/CSo	DIo/CSo	TRo/CSo	ETo/CSo	REo/CSo	ABS/CSm	DIo/CSm	TRo/CSm	ETo/CSm	REo/CSm	gamma(RC)/((1-gamma(RC))	phi(Po)/((1-phi(Po))	psi(Eo)/(1-psi(Eo))	PI abs	dRo/(1-dRo)
Jointing	N0	1	L1	290	28800	405	1268	863	426	445	525	699	904	0.3194	0.681	1.7192	2.131	0.3407	0.5782	0.2202	0.4635	33.3719	45.404	0.1151	1.999	0.6385	1.3605	0.897	0.574	0.6806	0.6593	0.4487	0.6397	0.2871	405	129.357	275.643	181.739	116.262	1268	405	863	569	364	0.5002	2.131	1.9354	2.063	1.7756
Jointing	N0	1	L2	270	28706	540	1607	1067	565	592	689	890	1231	0.336	0.664	1.5783	1.976	0.328	0.6476	0.253	0.4655	26.9036	38.1774	0.0996	2.1372	0.7182	1.419	0.9536	0.5	0.664	0.672	0.4462	0.5244	0.234	540	181.456	358.544	240.933	126.347	1607	540	1067	717	376	0.4679	1.976	2.0486	1.894	1.1026
Jointing	N0	1	L3	290	33926	456	1419	963	488	517	627	805	1035	0.3214	0.679	1.2865	2.112	0.3624	0.6012	0.3011	0.5919	35.2294	57.5379	0.1215	2.4066	0.7734	1.6332	1.0413	0.651	0.6786	0.6376	0.4327	0.6254	0.2706	456	146.537	309.463	197.311	123.4	1419	456	963	614	384	0.4155	2.112	1.7593	1.544	1.6696
Jointing	N0	1	L4	290	46386	518	1229	711	557	589	696	790	794	0.4215	0.579	0.4896	1.373	0.3826	0.3882	0.4501	0.8345	65.2406	142.314	0.225	3.7706	1.5892	2.1814	1.3469	1.335	0.5785	0.6174	0.3572	0.9909	0.3539	518	218.327	299.673	185.03	183.344	1229	518	711	439	435	0.2652	1.373	1.614	0.588	108.75
Jointing	N0	2	L1	290	29533	464	1458	994	487	510	598	789	1052	0.3182	0.682	1.8229	2.142	0.327	0.5915	0.2314	0.4494	29.7113	40.834	0.1025	2.0159	0.6416	1.3744	0.925	0.561	0.6818	0.673	0.4588	0.6069	0.2785	464	147.665	316.335	212.905	129.207	1458	464	994	669	406	0.4961	2.142	2.0585	2.187	1.5437
Jointing	N0	2	L2	400	28921	988	1563	575	1003	1013	1074	1203	1262	0.6321	0.368	0.2241	0.582	0.3739	0.4765	0.1739	0.4986	50.2977	67.0637	0.1257	3.6243	2.291	1.3333	0.8348	0.698	0.3679	0.6261	0.2303	0.8361	0.1926	988	624.532	363.468	227.562	190.267	1563	988	575	360	301	0.2759	0.582	1.6744	0.269	5.1017
Jointing	N0	2	L3	300	39166	606	1197	591	640	677	784	946	830	0.5063	0.494	0.1697	0.975	0.5753	0.379	0.6261	1.0039	66.2715	115.65	0.2209	3.5345	1.7894	1.7451	0.7411	1.084	0.4937	0.4247	0.2097	1.4622	0.3066	606	306.797	299.203	127.073	185.799	1197	606	591	251	367	0.2829	0.975	0.7382	0.204	-3.1638
Jointing	N0	2	L4
Jointing	N0	3	L1	270	34185	530	1372	842	553	573	650	802	993	0.3863	0.614	1.1578	1.589	0.323	0.5499	0.2375	0.4751	40.6004	59.7064	0.1504	2.3963	0.9257	1.4706	0.9955	0.662	0.6137	0.677	0.4155	0.6649	0.2762	530	204.738	325.262	220.19	146.407	1372	530	842	570	379	0.4173	1.589	2.0956	1.389	1.9843
Jointing	N0	3	L2	290	37568	574	1314	740	594	616	686	829	909	0.4368	0.563	0.786	1.289	0.3446	0.4527	0.2973	0.5045	50.7679	74.3269	0.1751	2.5997	1.1356	1.4641	0.9595	0.801	0.5632	0.6554	0.3691	0.8351	0.3082	574	250.743	323.257	211.864	176.918	1314	574	740	485	405	0.3847	1.289	1.902	0.943	5.0625
Jointing	N0	3	L3
Jointing	N0	3	L4	290	36072	605	1156	551	647	690	793	803	787	0.5234	0.477	0.2038	0.911	0.3593	0.3303	0.7804	1.1373	65.4661	207.199	0.2257	6.6401	3.4752	3.165	2.0277	2.12	0.4766	0.6407	0.3054	1.0453	0.3192	605	316.631	288.369	184.745	193.119	1156	605	551	353	369	0.1506	0.911	1.7828	0.245	-23.0625
Jointing	N0	4	L1	300	14222	531	962	431	556	578	656	767	812	0.552	0.448	0.1418	0.812	0.5476	0.652	0.5104	0.9667	32.9972	58.2577	0.11	3.9407	2.1752	1.7655	0.7988	0.614	0.448	0.4524	0.2027	0.7692	0.1559	531	293.099	237.901	107.635	82.7963	962	531	431	195	150	0.2538	0.812	0.8263	0.17	3.3333
Jointing	N0	4	L2	290	39533	731	1412	681	759	784	872	958	1024	0.5177	0.482	0.3617	0.932	0.3333	0.4302	0.3671	0.6902	58.0508	120.193	0.2002	4.293	2.2225	2.0705	1.3803	1.18	0.4823	0.6667	0.3215	0.8546	0.2748	731	378.443	352.557	235.038	200.87	1412	731	681	454	388	0.2329	0.932	2	0.434	5.8788
Jointing	N0	4	L3	290	34907	921	1647	726	946	979	1077	1194	1326	0.5592	0.441	0.2523	0.788	0.376	0.5579	0.4545	0.7163	48.0808	91.5825	0.1658	4.3211	2.4164	1.9048	1.1885	0.842	0.4408	0.624	0.275	0.7086	0.1949	921	515.022	405.978	253.317	179.503	1647	921	726	453	321	0.2314	0.788	1.6593	0.303	2.4318
Jointing	N0	4	L4	500	19032	559	1184	625	583	609	698	865	960	0.4721	0.528	0.3386	1.118	0.4896	0.6416	0.416	0.7413	30.4509	46.1076	0.0609	2.8684	1.3543	1.5142	0.7728	0.543	0.5279	0.5104	0.2694	0.7022	0.1892	559	263.92	295.08	150.609	105.757	1184	559	625	319	224	0.3486	1.118	1.0425	0.406	2.3579
Jointing	N0	5	L1	300	52852	472	1033	561	506	544	640	675	616	0.4569	0.543	0.3439	1.189	0.3619	0.2567	0.6774	0.9982	94.2105	259.891	0.314	5.0796	2.321	2.7586	1.7604	2.051	0.5431	0.6381	0.3466	1.1648	0.4037	472	215.667	256.333	163.578	190.536	1033	472	561	358	417	0.1969	1.189	1.7635	0.413	-7.0678
Jointing	N0	5	L2	190	13745	755	1448	693	776	795	884	1156	1231	0.5214	0.479	0.2486	0.918	0.5786	0.6869	0.2742	0.6205	19.8343	21.2687	0.1044	2.2406	1.1683	1.0723	0.4518	0.336	0.4786	0.4214	0.2017	0.7432	0.1499	755	393.664	361.336	152.251	113.146	1448	755	693	292	217	0.4463	0.918	0.7282	0.298	2.8933
Jointing	N0	5	L3	280	42848	432	970	538	463	494	579	632	567	0.4454	0.555	0.3971	1.245	0.3717	0.2509	0.5762	0.9108	79.6425	195.124	0.2844	4.4173	1.9673	2.45	1.5392	1.835	0.5546	0.6283	0.3485	1.1923	0.4155	432	192.396	239.604	150.532	179.48	970	432	538	338	403	0.2264	1.245	1.69	0.476	-6.2
Jointing	N0	5	L4	400	44258	480	784	304	512	548	629	642	526	0.6122	0.388	0.0585	0.633	0.5329	0.1513	1.1842	1.6338	145.585	446.34	0.364	7.9066	4.8408	3.0658	1.4321	2.602	0.3878	0.4671	0.1811	1.8169	0.3291	480	293.878	186.122	86.9388	157.959	784	480	304	142	258	0.1265	0.633	0.8765	0.07	-2.2241
Jointing	N0	6	L1	280	40370	452	1169	717	488	528	632	723	761	0.3867	0.613	0.6027	1.586	0.378	0.431	0.5579	0.8368	56.3044	124.659	0.2011	3.6098	1.3957	2.214	1.3772	1.26	0.6133	0.622	0.3815	0.9148	0.349	452	174.768	277.232	172.448	157.755	1169	452	717	446	408	0.277	1.586	1.6458	0.723	10.7368
Jointing	N0	6	L2	290	29024	543	1020	477	582	626	734	861	717	0.5324	0.468	0.0855	0.878	0.6667	0.3648	0.9224	1.3347	60.8462	121.82	0.2098	4.2812	2.2791	2.0021	0.6674	1.272	0.4676	0.3333	0.1559	1.9057	0.2971	543	289.068	253.932	84.6441	161.303	1020	543	477	159	303	0.2336	0.878	0.5	0.103	-2.1042
Jointing	N0	6	L3	600	9827	541	670	129	564	588	641	641	612	0.8075	0.193	0.0033	0.238	0.7752	0.5504	1.8605	2.584	76.179	253.93	0.127	17.3127	13.9793	3.3333	0.7494	1.499	0.1925	0.2248	0.0433	2	0.0866	541	436.837	104.163	23.4164	46.8328	670	541	129	29	58	0.0578	0.238	0.29	0.004	-2
Jointing	N0	6	L4	300	41518	515	885	370	551	598	691	676	571	0.5819	0.418	0.0892	0.718	0.4351	0.1514	1.2703	1.5856	112.21	408.88	0.374	8.7158	5.0719	3.6439	2.0583	3.092	0.4181	0.5649	0.2362	1.5024	0.3548	515	299.689	215.311	121.621	182.723	885	515	370	209	314	0.1147	0.718	1.2981	0.107	-2.9905
Jointing	N1	1	L1	900	119153	418	1477	1059	438	457	531	717	1122	0.283	0.717	3.0543	2.533	0.2823	0.6648	0.1794	0.3557	112.514	141.74	0.125	1.757	0.4972	1.2598	0.9041	0.422	0.717	0.7177	0.5146	0.4671	0.2404	418	118.296	299.704	215.085	100.467	1477	418	1059	760	355	0.5692	2.533	2.5418	3.665	0.8765
Jointing	N1	1	L2	300	29966	497	1393	896	521	555	669	921	1004	0.3568	0.643	0.7955	1.803	0.4732	0.5658	0.3795	0.6399	33.4441	45.2232	0.1115	2.1023	0.75	1.3522	0.7123	0.587	0.6432	0.5268	0.3388	0.8242	0.2793	497	177.322	319.678	168.402	138.789	1393	497	896	472	389	0.4757	1.803	1.1132	0.955	4.6867
Jointing	N1	1	L3
Jointing	N1	1	L4	400	20485	680	1753	1073	728	773	960	1286	1458	0.3879	0.612	0.4027	1.578	0.5648	0.7251	0.4194	0.8698	19.0912	29.4035	0.0477	2.5162	0.9761	1.5402	0.6703	0.423	0.6121	0.4352	0.2664	0.6317	0.1683	680	263.776	416.224	181.152	114.432	1753	680	1073	467	295	0.3974	1.578	0.7706	0.483	1.7151
Jointing	N1	2	L1	240	29257	419	1337	918	444	469	565	754	939	0.3134	0.687	1.5017	2.191	0.3649	0.5664	0.2723	0.5301	31.8706	46.2996	0.1328	2.1158	0.6631	1.4527	0.9226	0.63	0.6866	0.6351	0.4361	0.6827	0.2977	419	131.31	287.69	182.705	124.728	1337	419	918	583	398	0.4726	2.191	1.7403	1.802	2.1514
Jointing	N1	2	L2
Jointing	N1	2	L3	900	84603	477	1033	556	497	518	581	600	632	0.4618	0.538	0.653	1.166	0.2212	0.2788	0.3777	0.6235	152.165	428.865	0.1691	5.2364	2.418	2.8184	2.1949	2.033	0.5382	0.7788	0.4192	0.9261	0.3882	477	220.26	256.74	199.943	185.167	1033	477	556	433	401	0.191	1.166	3.5203	0.784	12.5313
Jointing	N1	2	L4	700	49391	533	989	456	561	591	674	697	701	0.5389	0.461	0.2042	0.856	0.3596	0.3684	0.6579	1.0307	108.313	310.41	0.1547	6.2156	3.3498	2.8659	1.8352	1.81	0.4611	0.6404	0.2952	0.9863	0.2912	533	287.249	245.751	157.367	155.211	989	533	456	292	288	0.1609	0.856	1.7805	0.245	72
Jointing	N1	3	L1	290	37229	390	1225	835	411	430	506	669	795	0.3184	0.682	1.7488	2.141	0.3341	0.485	0.2275	0.4631	44.5859	61.7917	0.1537	2.0332	0.6473	1.3859	0.9228	0.714	0.6816	0.6659	0.4539	0.7734	0.351	390	124.163	265.837	177.012	136.898	1225	390	835	556	430	0.4918	2.141	1.9928	2.099	3.4127
Jointing	N1	3	L2	300	45502	492	1277	785	503	513	556	695	788	0.3853	0.615	2.2298	1.596	0.2586	0.3771	0.1274	0.2718	57.964	60.9146	0.1932	1.7096	0.6587	1.0509	0.7791	0.655	0.6147	0.7414	0.4558	0.8402	0.3829	492	189.557	302.443	224.232	188.401	1277	492	785	582	489	0.5849	1.596	2.867	2.676	5.2581
Jointing	N1	3	L3	300	24040	471	1339	868	496	521	621	909	998	0.3518	0.648	0.8562	1.843	0.5046	0.6071	0.288	0.576	27.6954	31.6157	0.0923	1.761	0.6194	1.1416	0.5655	0.448	0.6482	0.4954	0.3211	0.793	0.2547	471	165.677	305.323	151.255	119.948	1339	471	868	430	341	0.5679	1.843	0.9817	1.027	3.8315
Jointing	N1	3	L4	600	37198	470	1409	939	496	521	618	821	994	0.3336	0.666	1.3224	1.998	0.3738	0.558	0.2662	0.5254	39.6141	55.6779	0.066	2.109	0.7035	1.4055	0.8801	0.621	0.6664	0.6262	0.4173	0.7058	0.2945	470	156.778	313.222	196.139	138.431	1409	470	939	588	415	0.4742	1.998	1.6752	1.587	2.3988
Jointing	N1	4	L1	300	24318	327	1191	864	361	394	522	752	865	0.2746	0.725	1.0788	2.642	0.4919	0.6227	0.3819	0.7523	28.1457	43.0463	0.0938	2.1083	0.5788	1.5294	0.7771	0.577	0.7254	0.5081	0.3686	0.7426	0.2737	327	89.7809	237.219	120.531	89.5063	1191	327	864	439	326	0.4743	2.642	1.0329	1.295	2.885
Jointing	N1	4	L2	290	43741	442	960	518	471	502	582	625	577	0.4604	0.54	0.3783	1.172	0.3533	0.2606	0.5985	0.9009	84.4422	215.335	0.2912	4.726	2.1759	2.5501	1.6492	1.885	0.5396	0.6467	0.349	1.1433	0.399	442	203.504	238.496	154.24	176.34	960	442	518	335	383	0.2116	1.172	1.8306	0.454	-7.9792
Jointing	N1	4	L3
Jointing	N1	4	L4	300	44913	545	1025	480	587	632	736	773	638	0.5317	0.468	0.136	0.881	0.475	0.1938	0.9375	1.3264	93.569	261.282	0.3119	5.9629	3.1705	2.7924	1.466	2.251	0.4683	0.525	0.2459	1.5357	0.3776	545	289.781	255.22	133.99	205.771	1025	545	480	252	387	0.1677	0.881	1.1053	0.163	-2.8667
Jointing	N1	5	L1	290	23044	416	1134	718	458	499	633	833	852	0.3668	0.633	0.379	1.726	0.5808	0.6072	0.571	1.0074	32.0953	55.6728	0.1107	2.7396	1.005	1.7346	0.7272	0.681	0.6332	0.4192	0.2654	0.9369	0.2487	416	152.607	263.393	110.42	103.45	1134	416	718	301	282	0.365	1.726	0.7218	0.455	14.8421
Jointing	N1	5	L2	280	27629	439	1203	764	485	535	677	873	862	0.3649	0.635	0.3831	1.74	0.5681	0.5537	0.6545	1.0384	36.1634	66.1051	0.1292	2.8783	1.0504	1.828	0.7896	0.816	0.6351	0.4319	0.2743	1.0333	0.2835	439	160.2	278.8	120.424	124.438	1203	439	764	330	341	0.3474	1.74	0.7604	0.46	-31
Jointing	N1	5	L3	280	39052	482	1077	595	519	559	651	683	654	0.4475	0.552	0.3975	1.234	0.3378	0.2891	0.6723	0.9468	65.6335	183.948	0.2344	5.073	2.2704	2.8027	1.8559	1.992	0.5525	0.6622	0.3658	1.0736	0.3928	482	215.714	266.286	176.331	189.309	1077	482	595	394	423	0.1971	1.234	1.9602	0.477	-14.5862
Jointing	N1	5	L4	280	36276	494	927	433	529	574	670	696	599	0.5329	0.467	0.1343	0.877	0.4665	0.2425	1.0393	1.3549	83.7786	243.317	0.2992	6.2177	3.3134	2.9043	1.5494	2.2	0.4671	0.5335	0.2492	1.4199	0.3538	494	263.253	230.746	123.1	174.792	927	494	433	231	328	0.1608	0.877	1.1436	0.161	-3.3814
Jointing	N1	6	L1	290	31719	419	1093	674	459	497	610	751	743	0.3833	0.617	0.444	1.609	0.4926	0.4807	0.5638	0.9446	47.0609	90.2474	0.1623	3.1098	1.1921	1.9177	0.9731	0.996	0.6167	0.5074	0.3129	1.0234	0.3202	419	160.623	258.377	131.105	134.172	1093	419	674	342	350	0.3216	1.609	1.0301	0.533	-43.75
Jointing	N1	6	L2	290	22081	558	979	421	584	615	687	735	790	0.57	0.43	0.1534	0.754	0.4204	0.5511	0.7363	1.0214	52.45	127.421	0.1809	5.6493	3.2199	2.4294	1.408	1.091	0.43	0.5796	0.2492	0.7746	0.1931	558	318.043	239.957	139.072	107.724	979	558	421	244	189	0.177	0.754	1.3785	0.184	3.4364
Jointing	N1	6	L3	600	32765	488	789	301	517	551	621	613	591	0.6185	0.381	0.0778	0.617	0.4153	0.3422	1.1296	1.4729	108.855	386.071	0.1814	9.2967	5.7501	3.5467	2.0738	2.333	0.3815	0.5847	0.2231	1.125	0.251	488	301.83	186.17	108.857	122.464	789	488	301	176	198	0.1076	0.617	1.408	0.093	-9
Jointing	N1	6	L4	600	41133	418	937	519	445	475	547	563	589	0.4461	0.554	0.4985	1.242	0.2794	0.3295	0.578	0.8285	79.2535	235.028	0.1321	5.3539	2.3884	2.9655	2.137	1.988	0.5539	0.7206	0.3991	0.9305	0.3714	418	186.472	231.528	166.843	155.244	937	418	519	374	348	0.1868	1.242	2.5793	0.598	13.3846
Jointing	N2	1	L1	300	39981	407	1463	1056	428	449	530	732	981	0.2782	0.722	2.7825	2.595	0.3078	0.5436	0.1989	0.3883	37.8613	47.7634	0.1262	1.7478	0.4862	1.2615	0.8733	0.576	0.7218	0.6922	0.4997	0.6594	0.3295	407	113.226	293.774	203.361	134.09	1463	407	1056	731	482	0.5722	2.595	2.2492	3.339	1.9357
Jointing	N2	1	L2	290	31468	471	1408	937	495	518	608	836	1011	0.3345	0.665	1.3819	1.989	0.3895	0.5763	0.2455	0.4874	33.5842	42.0186	0.1158	1.8801	0.6289	1.2511	0.7638	0.53	0.6655	0.6105	0.4063	0.6941	0.282	471	157.558	313.442	191.344	132.803	1408	471	937	572	397	0.5319	1.989	1.5671	1.658	2.2686
Jointing	N2	1	L3	300	34536	413	1548	1135	443	470	577	799	1101	0.2668	0.733	2.3006	2.748	0.3401	0.6062	0.2379	0.4816	30.4281	43.0933	0.1014	1.9316	0.5153	1.4162	0.9346	0.558	0.7332	0.6599	0.4839	0.5968	0.2888	413	110.187	302.813	199.83	119.258	1548	413	1135	749	447	0.5177	2.748	1.9404	2.761	1.4801
Jointing	N2	1	L4	400	41057	529	1366	837	563	592	710	916	940	0.3873	0.613	0.6026	1.582	0.4624	0.491	0.3465	0.7208	49.0523	76.4726	0.1226	2.5443	0.9853	1.559	0.8382	0.793	0.6127	0.5376	0.3294	0.9467	0.3119	529	204.862	324.138	174.268	164.974	1366	529	837	450	426	0.393	1.582	1.1628	0.723	17.75
Jointing	N2	2	L1	290	32796	415	1306	891	434	451	520	719	873	0.3178	0.682	2.0472	2.147	0.3412	0.514	0.1908	0.3928	36.8083	42.378	0.1269	1.6876	0.5362	1.1513	0.7585	0.56	0.6822	0.6588	0.4495	0.7376	0.3315	415	131.872	283.128	186.528	137.592	1306	415	891	587	433	0.5926	2.147	1.9309	2.457	2.8117
Jointing	N2	2	L2	400	50290	387	1388	1001	405	419	478	633	841	0.2788	0.721	3.8691	2.587	0.2458	0.4535	0.1399	0.303	50.2402	61.9493	0.1256	1.7098	0.4767	1.2331	0.93	0.674	0.7212	0.7542	0.5439	0.7245	0.3941	387	107.903	279.097	210.508	152.514	1388	387	1001	755	547	0.5849	2.587	3.0691	4.643	2.6298
Jointing	N2	2	L3
Jointing	N2	2	L4	600	34940	538	1562	1024	575	610	745	1002	1124	0.3444	0.656	0.8439	1.903	0.4531	0.5723	0.3418	0.6738	34.1216	50.7411	0.0569	2.2684	0.7813	1.4871	0.8132	0.636	0.6556	0.5469	0.3585	0.7821	0.2804	538	185.304	352.697	192.881	150.86	1562	538	1024	560	438	0.4408	1.903	1.2069	1.013	3.5902
Jointing	N2	3	L1	400	37327	387	1177	790	410	428	512	686	761	0.3288	0.671	1.3455	2.041	0.3785	0.4734	0.2278	0.5274	47.2489	65.8429	0.1181	2.0762	0.6827	1.3935	0.8661	0.734	0.6712	0.6215	0.4172	0.8473	0.3534	387	127.246	259.754	161.442	136.782	1177	387	790	491	416	0.4817	2.041	1.6421	1.615	5.5467
Jointing	N2	3	L2	300	55867	442	1259	817	462	484	555	662	720	0.3511	0.649	1.5843	1.848	0.2693	0.3403	0.2693	0.461	68.3804	117.076	0.2279	2.6384	0.9263	1.7121	1.2511	1.13	0.6489	0.7307	0.4742	0.9028	0.4281	442	155.174	286.826	209.59	189.228	1259	442	817	597	539	0.379	1.848	2.7136	1.901	9.2931
Jointing	N2	3	L3	600	38671	436	1387	951	456	473	554	788	930	0.3143	0.686	1.8979	2.181	0.3701	0.5195	0.1788	0.4136	40.6631	45.438	0.0678	1.6297	0.5123	1.1174	0.7038	0.537	0.6857	0.6299	0.4319	0.7629	0.3295	436	137.055	298.945	188.294	143.657	1387	436	951	599	457	0.6136	2.181	1.7017	2.278	3.2183
Jointing	N2	3	L4	400	68460	514	1240	726	550	583	685	721	697	0.4145	0.585	0.6275	1.412	0.2851	0.2521	0.4545	0.7851	94.297	259.658	0.2357	4.7032	1.9495	2.7536	1.9685	2.06	0.5855	0.7149	0.4185	1.0462	0.4379	514	213.061	300.939	215.134	225.082	1240	514	726	519	543	0.2126	1.412	2.5072	0.753	-22.625
Jointing	N2	4	L1	240	27997	498	950	452	526	556	629	691	645	0.5242	0.476	0.2134	0.908	0.427	0.3252	0.6637	0.9661	61.9403	140.141	0.2581	4.7553	2.4928	2.2625	1.2964	1.527	0.4758	0.573	0.2726	1.1776	0.3211	498	261.057	236.943	135.77	159.884	950	498	452	259	305	0.2103	0.908	1.342	0.256	-6.6304
Jointing	N2	4	L2	300	34091	462	858	396	484	507	565	595	561	0.5385	0.462	0.2525	0.857	0.3359	0.25	0.5808	0.867	86.0879	222.232	0.287	5.5931	3.0117	2.5815	1.7145	1.936	0.4615	0.6641	0.3065	1.1293	0.3462	462	248.769	213.231	141.615	159.923	858	462	396	263	297	0.1788	0.857	1.9774	0.303	-8.7353
Jointing	N2	4	L3	300	38651	417	835	418	435	456	509	524	515	0.4994	0.501	0.4241	1.002	0.256	0.2344	0.5024	0.7337	92.4665	265.013	0.3082	5.7252	2.8592	2.866	2.1324	2.194	0.5006	0.744	0.3725	1.0289	0.3832	417	208.25	208.75	155.314	159.808	835	417	418	311	320	0.1747	1.002	2.9065	0.509	-35.5556
Jointing	N2	4	L4	500	66534	373	1164	791	404	435	520	541	581	0.3204	0.68	1.5269	2.121	0.2124	0.263	0.3919	0.6195	84.1144	245.334	0.1682	4.292	1.3754	2.9167	2.2972	2.15	0.6796	0.7876	0.5352	0.9358	0.5009	373	119.527	253.473	199.638	186.82	1164	373	791	623	583	0.233	2.121	3.7083	1.832	14.575
Jointing	N2	5	L1	290	32611	457	1091	634	491	529	623	762	740	0.4189	0.581	0.3995	1.387	0.4811	0.4464	0.5994	0.8728	51.4372	93.3178	0.1774	3.1219	1.3077	1.8142	0.9414	1.004	0.5811	0.5189	0.3016	1.0669	0.3217	457	191.429	265.571	137.812	147.028	1091	457	634	329	351	0.3203	1.387	1.0787	0.479	-15.9545
Jointing	N2	5	L2	270	34169	464	913	449	493	525	604	649	577	0.5082	0.492	0.2243	0.968	0.412	0.2517	0.7127	1.0393	76.1	191.964	0.2819	5.1293	2.6068	2.5225	1.4832	1.888	0.4918	0.588	0.2892	1.2727	0.368	464	235.812	228.188	134.169	170.76	913	464	449	264	336	0.195	0.968	1.427	0.269	-4.6667
Jointing	N2	5	L3	300	23022	311	692	381	336	359	430	538	449	0.4494	0.551	0.2182	1.225	0.5958	0.3622	0.6037	1.0411	60.4241	105.587	0.2014	3.1738	1.4264	1.7474	0.7063	1.115	0.5506	0.4042	0.2225	1.5779	0.3512	311	139.77	171.23	69.211	109.21	692	311	381	154	243	0.3151	1.225	0.6784	0.262	-2.7303
Jointing	N2	5	L4	800	34484	451	736	285	481	513	586	582	557	0.6128	0.387	0.0698	0.632	0.4596	0.3719	1.1228	1.5789	120.997	415.64	0.1512	8.871	5.4359	3.4351	1.8562	2.157	0.3872	0.5404	0.2092	1.1623	0.2432	451	276.36	174.64	94.3668	109.686	736	451	285	154	179	0.1127	0.632	1.1756	0.084	-7.16
Jointing	N2	6	L1	270	26066	417	868	451	444	472	543	617	593	0.4804	0.52	0.2799	1.082	0.4435	0.3902	0.6208	0.9313	57.7963	121.372	0.2141	4.0417	1.9417	2.1	1.1687	1.28	0.5196	0.5565	0.2892	1.0956	0.3168	417	200.333	216.667	120.584	132.114	868	417	451	251	275	0.2474	1.082	1.255	0.336	-11.4583
Jointing	N2	6	L2	290	32377	482	1013	531	519	560	660	787	685	0.4758	0.524	0.1833	1.102	0.5744	0.3823	0.7721	1.1174	60.9742	118.617	0.2103	3.7112	1.7658	1.9454	0.828	1.202	0.5242	0.4256	0.2231	1.4513	0.3238	482	229.343	252.657	107.534	156.067	1013	482	531	226	328	0.2695	1.102	0.741	0.22	-3.2157
Jointing	N2	6	L3	600	65776	583	1137	554	595	610	644	653	692	0.5128	0.487	0.9184	0.95	0.1264	0.1968	0.2708	0.367	118.729	344.879	0.1979	5.9616	3.0568	2.9048	2.5377	2.333	0.4872	0.8736	0.4257	0.9194	0.3914	583	298.935	284.065	248.172	228.175	1137	583	554	484	445	0.1677	0.95	6.9143	1.102	11.4103
Jointing	N2	6	L4	400	38612	420	856	436	453	492	572	583	547	0.4907	0.509	0.2374	1.038	0.3739	0.2913	0.8945	1.1621	88.5593	275.276	0.2214	6.1027	2.9943	3.1084	1.9463	2.203	0.5093	0.6261	0.3189	1.1319	0.361	420	206.075	213.925	133.949	151.612	856	420	436	273	309	0.1639	1.038	1.6748	0.285	-8.5833
Growth stage	Nitrogen level	Sample No.	Leaf position	t for Fm	Area	Fo	Fm	Fv	F1	F2	F3	F4	F5	Fo/Fm	Fv/Fm	PI Inst.	Fv/Fo	Vj	Vi	dVG/dto	dV/dto	Sm	N	Sm/t(Fm)	ABS/RC	DIo/RC	TRo/RC	ETo/RC	REo/RC	phi(Po)	psi(Eo)	phi(Eo)	delta(Ro)	phi(Ro)	ABS/CSo	DIo/CSo	TRo/CSo	ETo/CSo	REo/CSo	ABS/CSm	DIo/CSm	TRo/CSm	ETo/CSm	REo/CSm	gamma(RC)/((1-gamma(RC))	phi(Po)/((1-phi(Po))	psi(Eo)/(1-psi(Eo))	PI abs	dRo/(1-dRo)
Booting	N0	1	L1	300	19447	223	974	751	248	269	376	640	738	0.229	0.771	1.4171	3.368	0.5553	0.6858	0.2796	0.6791	25.8947	31.6698	0.0863	1.5862	0.3632	1.223	0.5439	0.384	0.771	0.4447	0.3429	0.7066	0.2423	223	51.0565	171.944	76.4702	54.0329	974	223	751	334	236	0.6304	3.368	0.801	1.701	2.4082
Booting	N0	1	L2	260	17745	294	1307	1013	334	371	550	921	1065	0.2249	0.775	1.0067	3.446	0.619	0.7611	0.3653	0.8424	17.5176	23.8411	0.0674	1.756	0.395	1.361	0.5186	0.325	0.7751	0.381	0.2953	0.6269	0.1852	294	66.1331	227.867	86.8279	54.4361	1307	294	1013	386	242	0.5695	3.446	0.6156	1.208	1.6806
Booting	N0	1	L3	240	17241	270	1046	776	301	329	459	718	789	0.2581	0.742	0.9251	2.874	0.5773	0.6688	0.3608	0.8119	22.2175	31.2434	0.0926	1.8955	0.4893	1.4063	0.5944	0.466	0.7419	0.4227	0.3136	0.7835	0.2457	270	69.6941	200.306	84.6654	66.3384	1046	270	776	328	257	0.5276	2.874	0.7321	1.11	3.6197
Booting	N0	1	L4	300	28087	250	1162	912	275	302	411	659	856	0.2151	0.785	2.2363	3.648	0.4485	0.6645	0.2961	0.5885	30.797	40.41	0.1027	1.6718	0.3597	1.3121	0.7237	0.44	0.7849	0.5515	0.4329	0.6083	0.2633	250	53.7866	196.213	108.219	65.8348	1162	250	912	503	306	0.5981	3.648	1.2298	2.684	1.5533
Booting	N0	2	L1	300	21634	307	1468	1161	347	381	556	929	1234	0.2091	0.791	1.6186	3.782	0.5357	0.7984	0.2929	0.7149	18.6337	24.8649	0.0621	1.6873	0.3529	1.3344	0.6195	0.269	0.7909	0.4643	0.3672	0.4341	0.1594	307	64.2023	242.798	112.72	48.936	1468	307	1161	539	234	0.5927	3.782	0.8666	1.942	0.7672
Booting	N0	2	L2	290	19960	275	1275	1000	314	348	521	890	1016	0.2157	0.784	1.1159	3.636	0.615	0.741	0.34	0.82	19.96	26.6134	0.0688	1.7	0.3667	1.3333	0.5133	0.345	0.7843	0.385	0.302	0.6727	0.2031	275	59.3137	215.686	83.0392	55.8627	1275	275	1000	385	259	0.5882	3.636	0.626	1.339	2.0556
Booting	N0	2	L3	290	20726	271	1245	974	310	342	518	896	957	0.2177	0.782	0.9932	3.594	0.6417	0.7043	0.3285	0.8453	21.2797	28.0324	0.0734	1.6839	0.3665	1.3173	0.472	0.39	0.7823	0.3583	0.2803	0.8252	0.2313	271	58.9888	212.011	75.9671	62.6892	1245	271	974	349	288	0.5939	3.594	0.5584	1.192	4.7213
Booting	N0	2	L4	260	19899	240	1167	927	276	308	455	719	917	0.2057	0.794	1.5983	3.862	0.5167	0.7303	0.3452	0.7731	21.4665	32.1175	0.0826	1.8835	0.3874	1.4962	0.7231	0.403	0.7943	0.4833	0.3839	0.558	0.2142	240	49.3573	190.643	92.1337	51.4139	1167	240	927	448	250	0.5309	3.862	0.9353	1.918	1.2626
Booting	N0	3	L1	400	19326	303	1418	1115	347	381	572	1006	1179	0.2137	0.786	1.1079	3.68	0.6305	0.7857	0.3049	0.8042	17.3331	22.1081	0.0433	1.6221	0.3466	1.2755	0.4713	0.273	0.7863	0.3695	0.2906	0.5801	0.1685	303	64.7454	238.255	88.0367	51.0698	1418	303	1115	412	239	0.6165	3.68	0.5861	1.33	1.3815
Booting	N0	3	L2	280	22773	289	1282	993	336	374	577	949	961	0.2254	0.775	0.7693	3.436	0.6647	0.6767	0.3827	0.9668	22.9335	33.3578	0.0819	1.8779	0.4233	1.4545	0.4878	0.47	0.7746	0.3353	0.2598	0.964	0.2504	289	65.149	223.851	75.0679	72.3627	1282	289	993	333	321	0.5325	3.436	0.5045	0.923	26.75
Booting	N0	3	L3	290	24442	278	1254	976	317	351	519	899	908	0.2217	0.778	1.0063	3.511	0.6363	0.6455	0.3484	0.8231	25.0431	32.396	0.0864	1.6621	0.3685	1.2936	0.4705	0.459	0.7783	0.3637	0.2831	0.9746	0.2759	278	61.63	216.37	78.7002	76.7049	1254	278	976	355	346	0.6017	3.511	0.5717	1.208	38.4444
Booting	N0	3	L4	400	31651	250	1156	906	279	305	423	696	775	0.2163	0.784	1.888	3.624	0.4923	0.5795	0.287	0.6365	34.9349	45.17	0.0873	1.6498	0.3568	1.293	0.6565	0.544	0.7837	0.5077	0.3979	0.8283	0.3296	250	54.0657	195.934	99.481	82.3962	1156	250	906	460	381	0.6062	3.624	1.0314	2.266	4.8228
Booting	N0	4	L1	400	21448	319	1349	1030	371	415	632	1017	1103	0.2365	0.764	0.6537	3.229	0.6777	0.7612	0.4272	1.0129	20.8238	31.1263	0.0521	1.9577	0.4629	1.4947	0.4818	0.357	0.7635	0.3223	0.2461	0.741	0.1824	319	75.4344	243.566	78.5085	58.172	1349	319	1030	332	246	0.5108	3.229	0.4756	0.784	2.8605
Booting	N0	4	L2	500	20352	290	1261	971	332	368	561	968	1028	0.23	0.77	0.6969	3.348	0.6982	0.76	0.3708	0.9303	20.9595	27.9254	0.0419	1.7303	0.3979	1.3324	0.402	0.32	0.77	0.3018	0.2324	0.7952	0.1848	290	66.6931	223.307	67.383	53.5845	1261	290	971	293	233	0.5779	3.348	0.4322	0.836	3.8833
Booting	N0	4	L3	700	25470	247	1225	978	289	328	519	896	935	0.2016	0.798	0.9559	3.96	0.6636	0.7035	0.3988	0.9271	26.0434	36.3831	0.0372	1.7498	0.3528	1.397	0.47	0.414	0.7984	0.3364	0.2686	0.8815	0.2367	247	49.8033	197.197	66.3371	58.4735	1225	247	978	329	290	0.5715	3.96	0.5069	1.147	7.4359
Booting	N0	4	L4	300	19343	246	1043	797	277	305	436	697	752	0.2359	0.764	1.1271	3.24	0.5659	0.6349	0.3513	0.7946	24.27	34.0821	0.0809	1.8377	0.4334	1.4043	0.6096	0.513	0.7641	0.4341	0.3317	0.841	0.279	246	58.0211	187.979	81.6069	68.6347	1043	246	797	346	291	0.5441	3.24	0.7672	1.353	5.2909
Booting	N1	1	L1	500	23611	302	1338	1036	330	354	482	854	1072	0.2257	0.774	1.7855	3.43	0.5328	0.7432	0.2317	0.5792	22.7903	24.7721	0.0456	1.4038	0.3169	1.087	0.5078	0.279	0.7743	0.4672	0.3617	0.5496	0.1988	302	68.1644	233.836	109.244	60.0389	1338	302	1036	484	266	0.7123	3.43	0.8768	2.143	1.2202
Booting	N1	1	L2	500	23476	336	1449	1113	372	404	571	987	1204	0.2319	0.768	1.2505	3.313	0.5849	0.7799	0.2875	0.7038	21.0928	25.3805	0.0422	1.5665	0.3633	1.2033	0.4995	0.265	0.7681	0.4151	0.3188	0.5303	0.1691	336	77.913	258.087	107.13	56.8116	1449	336	1113	462	245	0.6384	3.313	0.7097	1.501	1.129
Booting	N1	1	L3	500	27416	305	1298	993	332	347	465	808	965	0.235	0.765	1.907	3.256	0.5065	0.6647	0.1511	0.5371	27.6089	29.2738	0.0552	1.386	0.3257	1.0603	0.5232	0.356	0.765	0.4935	0.3775	0.6796	0.2565	305	71.668	233.332	115.139	78.2473	1298	305	993	490	333	0.7215	3.256	0.9742	2.288	2.121
Booting	N1	1	L4	300	26088	280	1272	992	312	340	473	771	919	0.2201	0.78	1.7931	3.543	0.495	0.6442	0.2823	0.6485	26.2981	34.4571	0.0877	1.6801	0.3698	1.3103	0.6617	0.466	0.7799	0.505	0.3939	0.7046	0.2775	280	61.6352	218.365	110.283	77.7044	1272	280	992	501	353	0.5952	3.543	1.0204	2.152	2.3851
Booting	N1	2	L1	600	27134	289	1422	1133	323	350	494	921	1149	0.2032	0.797	1.9085	3.92	0.5578	0.759	0.2383	0.6031	23.9485	25.8937	0.0399	1.357	0.2758	1.0812	0.4781	0.261	0.7968	0.4422	0.3523	0.5449	0.192	289	58.7349	230.265	101.821	55.4831	1422	289	1133	501	273	0.7369	3.92	0.7927	2.29	1.1974
Booting	N1	2	L2	600	33495	289	1444	1155	315	338	459	833	1159	0.2001	0.8	2.8723	3.997	0.471	0.7532	0.1991	0.4906	29.0003	30.2086	0.0483	1.3023	0.2606	1.0417	0.551	0.257	0.7999	0.529	0.4231	0.4664	0.1974	289	57.84	231.16	122.285	57.0395	1444	289	1155	611	285	0.7679	3.997	1.1232	3.447	0.8742
Booting	N1	2	L3	800	32878	271	1356	1085	300	323	452	847	1040	0.1999	0.8	2.2522	4.004	0.5309	0.7088	0.212	0.5561	30.3022	31.7402	0.0379	1.3091	0.2616	1.0475	0.4914	0.305	0.8001	0.4691	0.3754	0.6208	0.233	271	54.16	216.84	101.725	63.1534	1356	271	1085	509	316	0.7639	4.004	0.8837	2.703	1.6373
Booting	N1	2	L4	600	33311	252	1249	997	284	312	452	750	896	0.2018	0.798	1.9699	3.956	0.4995	0.6459	0.2808	0.6687	33.4107	44.7266	0.0557	1.6771	0.3384	1.3387	0.67	0.474	0.7982	0.5005	0.3995	0.7074	0.2826	252	50.8439	201.156	100.679	71.2218	1249	252	997	499	353	0.5963	3.956	1.002	2.364	2.4178
Booting	N1	3	L1	700	27228	303	1440	1137	340	372	536	969	1134	0.2104	0.79	1.4973	3.752	0.5858	0.7309	0.2814	0.6831	23.9474	27.9266	0.0342	1.4769	0.3108	1.1662	0.4831	0.314	0.7896	0.4142	0.3271	0.6497	0.2125	303	63.7563	239.244	99.1062	64.3875	1440	303	1137	471	306	0.6771	3.752	0.7072	1.797	1.8545
Booting	N1	3	L2	600	24997	313	1407	1094	358	395	591	1029	1122	0.2225	0.778	0.9238	3.495	0.6545	0.7395	0.3382	0.847	22.8494	29.5723	0.0381	1.6645	0.3703	1.2942	0.4472	0.337	0.7775	0.3455	0.2687	0.754	0.2026	313	69.6297	243.37	84.0896	63.4009	1407	313	1094	378	285	0.6008	3.495	0.5279	1.109	3.0645
Booting	N1	3	L3	900	36034	271	1224	953	299	320	444	770	909	0.2214	0.779	1.7963	3.517	0.5236	0.6695	0.2204	0.6051	37.8112	43.6963	0.042	1.4843	0.3286	1.1556	0.5505	0.382	0.7786	0.4764	0.3709	0.6938	0.2574	271	60.0008	210.999	100.518	69.7426	1224	271	953	454	315	0.6737	3.517	0.9098	2.156	2.2662
Booting	N1	3	L4	500	25012	258	1210	952	290	318	458	776	863	0.2132	0.787	1.575	3.69	0.5441	0.6355	0.2941	0.7003	26.2736	33.8141	0.0525	1.6358	0.3488	1.287	0.5867	0.469	0.7868	0.4559	0.3587	0.7995	0.2868	258	55.0116	202.988	92.5388	73.9884	1210	258	952	434	347	0.6113	3.69	0.8378	1.89	3.9885
Booting	N1	4	L1	600	24596	342	1433	1091	387	428	617	1011	1136	0.2387	0.761	0.9317	3.19	0.6132	0.7278	0.3758	0.8402	22.5447	30.8909	0.0376	1.7997	0.4295	1.3702	0.53	0.373	0.7613	0.3868	0.2945	0.7038	0.2073	342	81.6218	260.378	100.715	70.8821	1433	342	1091	422	297	0.5556	3.19	0.6308	1.118	2.376
Booting	N1	4	L2	800	37565	294	1415	1121	324	349	487	905	1051	0.2078	0.792	1.9955	3.813	0.545	0.6753	0.223	0.5739	33.51	35.2833	0.0419	1.3291	0.2761	1.0529	0.479	0.342	0.7922	0.455	0.3604	0.7137	0.2572	294	61.0855	232.915	105.965	75.6297	1415	294	1121	510	364	0.7524	3.813	0.8347	2.395	2.4932
Booting	N1	4	L3	600	29803	290	1221	931	322	349	495	839	843	0.2375	0.762	1.1403	3.21	0.5897	0.594	0.29	0.734	32.0116	39.8444	0.0534	1.6324	0.3877	1.2447	0.5107	0.505	0.7625	0.4103	0.3129	0.9895	0.3096	290	68.878	221.122	90.7289	89.7789	1221	290	931	382	378	0.6126	3.21	0.6958	1.368	94.5
Booting	N1	4	L4	600	33611	253	1182	929	282	309	440	778	791	0.214	0.786	1.5587	3.672	0.5651	0.5791	0.2906	0.671	36.1802	42.9569	0.0603	1.5106	0.3233	1.1873	0.5163	0.5	0.786	0.4349	0.3418	0.9678	0.3308	253	54.1531	198.847	86.4738	83.6912	1182	253	929	404	391	0.662	3.672	0.7695	1.87	30.0769
Booting	N2	1	L1	800	43405	263	1394	1131	286	305	415	753	1024	0.1887	0.811	3.6784	4.3	0.4332	0.6729	0.168	0.448	38.3777	39.683	0.048	1.2745	0.2404	1.034	0.586	0.338	0.8113	0.5668	0.4598	0.5772	0.2654	263	49.6191	213.381	120.935	69.8063	1394	263	1131	641	370	0.7846	4.3	1.3082	4.414	1.3653
Booting	N2	1	L2	800	43653	274	1315	1041	302	326	451	823	904	0.2084	0.792	2.0901	3.799	0.5274	0.6052	0.2305	0.5668	41.9336	45.0652	0.0524	1.3575	0.2829	1.0747	0.5079	0.424	0.7916	0.4726	0.3741	0.8354	0.3125	274	57.092	216.908	102.516	85.638	1315	274	1041	492	411	0.7366	3.799	0.8962	2.508	5.0741
Booting	N2	1	L3	600	30894	257	1196	939	283	307	424	719	862	0.2149	0.785	2.0484	3.654	0.492	0.6443	0.2556	0.5928	32.9006	39.6421	0.0548	1.5347	0.3298	1.2049	0.6121	0.429	0.7851	0.508	0.3988	0.7002	0.2793	257	55.2249	201.775	102.499	71.7709	1196	257	939	477	334	0.6516	3.654	1.0325	2.458	2.3357
Booting	N2	1	L4	290	19178	289	1223	934	349	406	647	978	941	0.2363	0.764	0.4223	3.232	0.7377	0.6981	0.6103	1.2777	20.5334	35.5634	0.0708	2.2679	0.5359	1.732	0.4543	0.523	0.7637	0.2623	0.2003	1.151	0.2306	289	68.2919	220.708	57.8945	66.6378	1223	289	934	245	282	0.4409	3.232	0.3556	0.507	-7.6216
Booting	N2	2	L1	700	29944	310	1470	1160	352	387	565	1015	1177	0.2109	0.789	1.3172	3.742	0.6078	0.7474	0.3017	0.7328	25.8142	31.1235	0.0369	1.5279	0.3222	1.2057	0.4729	0.305	0.7891	0.3922	0.3095	0.644	0.1993	310	65.3741	244.626	95.9524	61.7891	1470	310	1160	455	293	0.6545	3.742	0.6454	1.581	1.8086
Booting	N2	2	L2	900	35570	259	1191	932	283	304	416	737	913	0.2175	0.783	2.0357	3.598	0.5129	0.7017	0.2253	0.5615	38.1654	41.785	0.0424	1.3991	0.3043	1.0948	0.5333	0.327	0.7825	0.4871	0.3812	0.6123	0.2334	259	56.3233	202.677	98.7288	60.4551	1191	259	932	454	278	0.7147	3.598	0.9498	2.443	1.5795
Booting	N2	2	L3	700	31745	254	1213	959	281	306	429	765	927	0.2094	0.791	1.9104	3.776	0.5328	0.7018	0.2607	0.6083	33.1027	37.7885	0.0473	1.4439	0.3024	1.1416	0.5333	0.34	0.7906	0.4672	0.3693	0.6384	0.2358	254	53.1871	200.813	93.8104	59.8879	1213	254	959	448	286	0.6926	3.776	0.8767	2.292	1.7654
Booting	N2	2	L4	240	19083	250	1094	844	283	313	452	708	838	0.2285	0.771	1.2442	3.376	0.5427	0.6967	0.3555	0.7978	22.6105	33.2411	0.0942	1.9056	0.4355	1.4702	0.6724	0.446	0.7715	0.4573	0.3528	0.6632	0.234	250	57.1298	192.87	88.2084	58.5009	1094	250	844	386	256	0.5248	3.376	0.8428	1.493	1.9692
Booting	N2	3	L1	900	42241	264	1261	997	285	305	402	747	976	0.2094	0.791	2.7803	3.777	0.4845	0.7141	0.2006	0.4614	42.3678	40.3503	0.0471	1.2046	0.2522	0.9524	0.491	0.272	0.7906	0.5155	0.4076	0.5545	0.226	264	55.2704	208.73	107.61	59.6669	1261	264	997	514	285	0.8302	3.777	1.0642	3.336	1.2445
Booting	N2	3	L2	700	30869	280	1143	863	305	328	444	777	892	0.245	0.755	1.2984	3.082	0.5759	0.7092	0.2665	0.6334	35.7691	39.3437	0.0511	1.4568	0.3569	1.0999	0.4665	0.32	0.755	0.4241	0.3202	0.6858	0.2196	280	68.5914	211.409	89.6588	61.4873	1143	280	863	366	251	0.6864	3.082	0.7364	1.558	2.1826
Booting	N2	3	L3	600	32570	261	1101	840	280	298	390	689	833	0.2371	0.763	1.9606	3.218	0.5095	0.681	0.2143	0.5119	38.7734	38.9546	0.0646	1.3168	0.3122	1.0047	0.4928	0.321	0.7629	0.4905	0.3742	0.6505	0.2434	261	61.8719	199.128	97.6676	63.5313	1101	261	840	412	268	0.7594	3.218	0.9626	2.353	1.8611
Booting	N2	3	L4	300	23459	262	1151	889	299	330	485	777	799	0.2276	0.772	1.0988	3.393	0.5793	0.604	0.3487	0.8361	26.3878	38.0872	0.088	1.8687	0.4254	1.4434	0.6072	0.572	0.7724	0.4207	0.3249	0.9412	0.3058	262	59.6386	202.361	85.1329	80.1251	1151	262	889	374	352	0.5351	3.393	0.7262	1.319	16
Booting	N2	4	L1	800	29268	292	1436	1144	328	359	519	917	1152	0.2033	0.797	1.784	3.918	0.5463	0.7517	0.271	0.6614	25.5841	30.9738	0.032	1.5197	0.309	1.2107	0.5492	0.301	0.7967	0.4537	0.3614	0.5472	0.1978	292	59.376	232.624	105.535	57.7493	1436	292	1144	519	284	0.658	3.918	0.8304	2.141	1.2085
Booting	N2	4	L2	900	21066	299	1213	914	331	361	505	896	952	0.2465	0.754	0.8861	3.057	0.6532	0.7144	0.3282	0.7513	23.0479	26.5096	0.0256	1.5265	0.3763	1.1502	0.3989	0.328	0.7535	0.3468	0.2613	0.8233	0.2152	299	73.7024	225.298	78.1393	64.3355	1213	299	914	317	261	0.6551	3.057	0.531	1.063	4.6607
Booting	N2	4	L3	800	30632	288	1255	967	320	351	507	896	921	0.2295	0.771	1.0602	3.358	0.6287	0.6546	0.3206	0.7549	31.6772	38.0335	0.0396	1.5582	0.3576	1.2007	0.4457	0.415	0.7705	0.3713	0.2861	0.9304	0.2661	288	66.0908	221.909	82.3841	76.647	1255	288	967	359	334	0.6417	3.358	0.5905	1.272	13.36
Booting	N2	4	L4	600	24534	270	1297	1027	304	333	490	868	952	0.2082	0.792	1.4683	3.804	0.5823	0.6641	0.2824	0.7141	23.8893	29.2956	0.0398	1.5487	0.3224	1.2263	0.5123	0.412	0.7918	0.4177	0.3308	0.8042	0.266	270	56.2066	213.793	89.3061	71.8196	1297	270	1027	429	345	0.6457	3.804	0.7174	1.762	4.1071
Growth stage	Nitrogen level	Sample No.	Leaf position	t for Fm	Area	Fo	Fm	Fv	F1	F2	F3	F4	F5	Fo/Fm	Fv/Fm	PI Inst.	Fv/Fo	Vj	Vi	dVG/dto	dV/dto	Sm	N	Sm/t(Fm)	ABS/RC	DIo/RC	TRo/RC	ETo/RC	REo/RC	phi(Po)	psi(Eo)	phi(Eo)	delta(Ro)	phi(Ro)	ABS/CSo	DIo/CSo	TRo/CSo	ETo/CSo	REo/CSo	ABS/CSm	DIo/CSm	TRo/CSm	ETo/CSm	REo/CSm	gamma(RC)/((1-gamma(RC))	phi(Po)/((1-phi(Po))	psi(Eo)/(1-psi(Eo))	PI abs	dRo/(1-dRo)
Initial heading	N0	1	L1	600	22085	291	1415	1124	342	385	594	919	1153	0.2057	0.794	1.2556	3.863	0.5587	0.7669	0.3826	0.8986	19.6486	31.6004	0.0327	2.0247	0.4164	1.6083	0.7097	0.375	0.7943	0.4413	0.3505	0.5282	0.1852	291	59.8452	231.155	102.004	53.8813	1415	291	1124	496	262	0.4939	3.863	0.7898	1.507	1.1197
Initial heading	N0	1	L2	280	17345	265	1314	1049	310	347	529	875	1095	0.2017	0.798	1.3137	3.958	0.5815	0.7912	0.3527	0.8389	16.5344	23.8528	0.0591	1.8071	0.3644	1.4426	0.6037	0.301	0.7983	0.4185	0.3341	0.4989	0.1667	265	53.4437	211.556	88.535	44.1667	1314	265	1049	439	219	0.5534	3.958	0.7197	1.576	0.9955
Initial heading	N0	1	L3	290	23518	258	1219	961	292	320	464	764	929	0.2116	0.788	1.6215	3.725	0.5265	0.6982	0.2914	0.7145	24.4723	33.2102	0.0844	1.7214	0.3643	1.357	0.6425	0.41	0.7884	0.4735	0.3733	0.6374	0.2379	258	54.6054	203.395	96.3002	61.3782	1219	258	961	455	290	0.5809	3.725	0.8992	1.946	1.7576
Initial heading	N0	1	L4	250	16380	237	872	635	254	270	345	550	675	0.2718	0.728	1.4543	2.679	0.4929	0.6898	0.252	0.5669	25.7954	29.6688	0.1032	1.5794	0.4293	1.1502	0.5832	0.357	0.7282	0.5071	0.3693	0.6118	0.2259	237	64.414	172.586	87.5161	53.5424	872	237	635	322	197	0.6331	2.679	1.0288	1.745	1.576
Initial heading	N0	2	L1	400	24425	297	1340	1043	341	379	562	900	1072	0.2216	0.778	1.1346	3.512	0.5781	0.743	0.3643	0.8469	23.4183	34.3053	0.0585	1.882	0.4171	1.4649	0.618	0.376	0.7784	0.4219	0.3284	0.6091	0.2	297	65.8276	231.172	97.5224	59.4	1340	297	1043	440	268	0.5313	3.512	0.7297	1.362	1.5581
Initial heading	N0	2	L2	300	22588	266	1347	1081	304	338	502	849	1055	0.1975	0.803	1.7205	4.064	0.5393	0.7299	0.3145	0.7277	20.8954	28.195	0.0697	1.6814	0.332	1.3493	0.6216	0.364	0.8025	0.4607	0.3697	0.5863	0.2168	266	52.5286	213.471	98.343	57.663	1347	266	1081	498	292	0.5948	4.064	0.8542	2.065	1.4175
Initial heading	N0	2	L3	280	23874	273	1310	1037	307	335	487	820	1026	0.2084	0.792	1.7213	3.799	0.5275	0.7261	0.27	0.6879	23.022	30.0227	0.0822	1.6474	0.3433	1.3041	0.6162	0.357	0.7916	0.4725	0.374	0.5796	0.2168	273	56.8924	216.108	102.115	59.1847	1310	273	1037	490	284	0.607	3.799	0.8958	2.066	1.3786
Initial heading	N0	2	L4	290	29189	260	1179	919	279	303	393	621	767	0.2205	0.779	2.8898	3.535	0.3928	0.5517	0.2612	0.4824	31.762	39.006	0.1095	1.5755	0.3474	1.2281	0.7457	0.551	0.7795	0.6072	0.4733	0.7384	0.3494	260	57.3367	202.663	123.053	90.8567	1179	260	919	558	412	0.6347	3.535	1.5457	3.468	2.8219
Initial heading	N0	3	L1	400	21732	267	1318	1051	312	348	543	899	1068	0.2026	0.797	1.1913	3.936	0.6013	0.7621	0.3425	0.8754	20.6773	30.0999	0.0517	1.8255	0.3698	1.4557	0.5803	0.346	0.7974	0.3987	0.3179	0.5967	0.1897	267	54.0888	212.911	84.8809	50.6449	1318	267	1051	419	250	0.5478	3.936	0.663	1.43	1.4793
Initial heading	N0	3	L2	600	25699	274	1397	1123	317	349	529	858	1152	0.1961	0.804	1.741	4.099	0.52	0.7818	0.285	0.7569	22.8846	33.3081	0.0381	1.8106	0.3551	1.4555	0.6986	0.318	0.8039	0.48	0.3858	0.4545	0.1754	274	53.7409	220.259	105.716	48.053	1397	274	1123	539	245	0.5523	4.099	0.9229	2.089	0.8333
Initial heading	N0	3	L3	600	30166	293	1270	977	332	363	532	881	979	0.2307	0.769	1.0438	3.334	0.6018	0.7021	0.3173	0.8154	30.8759	41.8331	0.0515	1.7612	0.4063	1.3549	0.5395	0.404	0.7693	0.3982	0.3063	0.7481	0.2291	293	67.5976	225.402	89.7457	67.1362	1270	293	977	389	291	0.5678	3.334	0.6616	1.253	2.9694
Initial heading	N0	3	L4	600	33309	248	1168	920	281	303	434	673	857	0.2123	0.788	1.9441	3.71	0.462	0.662	0.2391	0.6739	36.2058	52.8179	0.0603	1.8521	0.3932	1.4588	0.7849	0.493	0.7877	0.538	0.4238	0.6283	0.2663	248	52.6575	195.343	105.103	66.0342	1168	248	920	495	311	0.5399	3.71	1.1647	2.333	1.6902
Initial heading	N0	4	L1	400	20184	282	1285	1003	320	355	486	692	1069	0.2195	0.781	2.0175	3.557	0.4088	0.7846	0.349	0.678	20.1233	33.3751	0.0503	2.1248	0.4663	1.6585	0.9806	0.357	0.7805	0.5912	0.4615	0.3642	0.1681	282	61.8864	220.114	130.137	47.4023	1285	282	1003	593	216	0.4706	3.557	1.4463	2.421	0.5729
Initial heading	N0	4	L2	250	14118	316	1202	886	361	403	584	849	1000	0.2629	0.737	0.6805	2.804	0.6016	0.772	0.474	1.0083	15.934	26.7062	0.0637	2.2738	0.5978	1.676	0.6678	0.382	0.7371	0.3984	0.2937	0.5722	0.1681	316	83.0749	232.925	92.802	53.1048	1202	316	886	353	202	0.4398	2.804	0.6623	0.817	1.3377
Initial heading	N0	4	L3	400	17944	296	1276	980	345	386	585	922	1045	0.232	0.768	0.7787	3.311	0.6388	0.7643	0.4184	0.983	18.31	28.1768	0.0458	2.0037	0.4648	1.5389	0.5559	0.363	0.768	0.3612	0.2774	0.6525	0.181	296	68.6646	227.335	82.1191	53.5862	1276	296	980	354	231	0.4991	3.311	0.5655	0.934	1.878
Initial heading	N0	4	L4	600	24859	275	1246	971	313	348	529	910	859	0.2207	0.779	0.91	3.531	0.654	0.6014	0.3605	0.872	25.6019	34.1359	0.0427	1.711	0.3776	1.3333	0.4614	0.531	0.7793	0.346	0.2697	1.1518	0.3106	275	60.6942	214.306	74.1573	85.4133	1246	275	971	336	387	0.5845	3.531	0.5291	1.092	-7.5882
Initial heading	N1	1	L1	500	28453	322	1619	1297	360	395	570	1022	1337	0.1989	0.801	1.942	4.028	0.5397	0.7826	0.2699	0.6374	21.9374	25.907	0.0439	1.4741	0.2932	1.181	0.5436	0.257	0.8011	0.4603	0.3687	0.4724	0.1742	322	64.042	257.958	118.736	56.0865	1619	322	1297	597	282	0.6784	4.028	0.8529	2.33	0.8952
Initial heading	N1	1	L2	600	30702	288	1418	1130	326	360	524	915	1116	0.2031	0.797	1.666	3.924	0.5549	0.7327	0.3009	0.6962	27.1698	34.0886	0.0453	1.5744	0.3198	1.2547	0.5585	0.335	0.7969	0.4451	0.3547	0.6004	0.213	288	58.4937	229.506	102.161	61.3371	1418	288	1130	503	302	0.6352	3.924	0.8022	1.999	1.5025
Initial heading	N1	1	L3	600	31601	295	1437	1142	325	350	481	813	1128	0.2053	0.795	2.5803	3.871	0.4536	0.7294	0.2189	0.5429	27.6719	33.1208	0.0461	1.5061	0.3092	1.1969	0.654	0.324	0.7947	0.5464	0.4342	0.4952	0.215	295	60.5602	234.44	128.1	63.4342	1437	295	1142	624	309	0.664	3.871	1.2046	3.096	0.981
Initial heading	N1	1	L4	700	35864	268	1177	909	292	316	428	743	835	0.2277	0.772	1.7763	3.392	0.5226	0.6238	0.264	0.5867	39.4546	44.2999	0.0564	1.4538	0.331	1.1228	0.5361	0.422	0.7723	0.4774	0.3687	0.788	0.2906	268	61.0229	206.977	98.8207	77.8726	1177	268	909	434	342	0.6878	3.392	0.9137	2.132	3.7174
Initial heading	N1	2	L1	600	36269	288	1480	1192	321	350	493	829	1145	0.1946	0.805	2.6465	4.139	0.4539	0.719	0.2433	0.5733	30.4271	38.4322	0.0507	1.5683	0.3052	1.2631	0.6898	0.355	0.8054	0.5461	0.4399	0.5146	0.2264	288	56.0432	231.957	126.681	65.1892	1480	288	1192	651	335	0.6376	4.139	1.2033	3.176	1.0601
Initial heading	N1	2	L2	600	21207	298	1477	1179	326	357	510	969	1252	0.2018	0.798	1.8919	3.956	0.5691	0.8092	0.2629	0.5994	17.9871	18.9432	0.03	1.3193	0.2662	1.0532	0.4538	0.201	0.7982	0.4309	0.3439	0.4429	0.1523	298	60.1246	237.875	102.494	45.3961	1477	298	1179	508	225	0.758	3.956	0.7571	2.27	0.7951
Initial heading	N1	2	L3	230	21537	284	1107	823	311	333	440	705	772	0.2565	0.743	1.388	2.898	0.5115	0.593	0.2673	0.6318	26.1692	32.323	0.1138	1.6614	0.4262	1.2352	0.6033	0.503	0.7435	0.4885	0.3631	0.8333	0.3026	284	72.86	211.14	103.133	85.944	1107	284	823	402	335	0.6019	2.898	0.9549	1.666	5
Initial heading	N1	2	L4	290	19252	285	957	672	308	333	427	684	714	0.2978	0.702	0.7958	2.358	0.5938	0.6384	0.372	0.7044	28.649	33.9863	0.0988	1.6894	0.5031	1.1863	0.4819	0.429	0.7022	0.4063	0.2853	0.8901	0.2539	285	84.8746	200.125	81.3009	72.3668	957	285	672	273	243	0.5919	2.358	0.6842	0.955	8.1
Initial heading	N1	3	L1	600	27124	331	1556	1225	372	406	583	949	1292	0.2127	0.787	1.7545	3.701	0.5045	0.7845	0.2776	0.6857	22.1424	30.0965	0.0369	1.7265	0.3673	1.3592	0.6735	0.293	0.7873	0.4955	0.3901	0.4349	0.1697	331	70.412	260.588	129.124	56.1594	1556	331	1225	607	264	0.5792	3.701	0.9822	2.105	0.7697
Initial heading	N1	3	L2	600	26853	320	1436	1116	361	397	577	993	1165	0.2228	0.777	1.168	3.487	0.603	0.7572	0.3226	0.7676	24.0616	30.6282	0.0401	1.6379	0.365	1.2729	0.5053	0.309	0.7772	0.397	0.3085	0.6117	0.1887	320	71.3092	248.691	98.7187	60.39	1436	320	1116	443	271	0.6105	3.487	0.6582	1.402	1.5756
Initial heading	N1	3	L3	220	17314	279	1089	810	308	333	448	731	832	0.2562	0.744	1.1436	2.903	0.558	0.6827	0.3086	0.6955	21.3758	26.6409	0.0972	1.6756	0.4293	1.2463	0.5508	0.395	0.7438	0.442	0.3287	0.7179	0.236	279	71.4793	207.521	91.719	65.843	1089	279	810	358	257	0.5968	2.903	0.792	1.372	2.5446
Initial heading	N1	3	L4	280	28428	262	1222	960	293	319	441	724	879	0.2144	0.786	2.0021	3.664	0.4813	0.6427	0.2708	0.6215	29.6121	38.2436	0.1058	1.644	0.3525	1.2915	0.67	0.461	0.7856	0.5188	0.4075	0.6888	0.2807	262	56.1735	205.827	106.772	73.5401	1222	262	960	498	343	0.6083	3.664	1.0779	2.403	2.2129
Initial heading	N1	4	L1	400	20883	318	1418	1100	364	401	590	995	1169	0.2243	0.776	1.0433	3.459	0.6155	0.7736	0.3364	0.8242	18.9845	25.4249	0.0475	1.7264	0.3872	1.3392	0.515	0.303	0.7757	0.3845	0.2983	0.5887	0.1756	318	71.3145	246.685	94.8618	55.8406	1418	318	1100	423	249	0.5792	3.459	0.6248	1.252	1.431
Initial heading	N1	4	L2	700	33038	286	1421	1135	320	347	498	867	1070	0.2013	0.799	2.0708	3.969	0.5119	0.6907	0.2379	0.6226	29.1081	35.404	0.0416	1.5228	0.3065	1.2163	0.5937	0.376	0.7987	0.4881	0.3899	0.6336	0.247	286	57.5623	228.438	111.502	70.6446	1421	286	1135	554	351	0.6567	3.969	0.9535	2.485	1.7291
Initial heading	N1	4	L3	700	30662	328	1386	1058	374	414	614	1046	1060	0.2367	0.763	0.7318	3.226	0.6786	0.6919	0.3781	0.9011	28.9816	38.4806	0.0414	1.7394	0.4116	1.3278	0.4267	0.409	0.7633	0.3214	0.2453	0.9588	0.2352	328	77.6219	250.378	80.4618	77.1486	1386	328	1058	340	326	0.5749	3.226	0.4735	0.878	23.2857
Initial heading	N1	4	L4	500	33024	279	1200	921	307	330	446	783	793	0.2325	0.767	1.5816	3.301	0.5472	0.5581	0.2497	0.6044	35.8562	39.6031	0.0717	1.4391	0.3346	1.1045	0.5001	0.488	0.7675	0.4528	0.3475	0.976	0.3392	279	64.8675	214.132	96.9525	94.6275	1200	279	921	417	407	0.6949	3.301	0.8274	1.898	40.7
Initial heading	N2	1	L1	800	40962	300	1552	1252	337	363	534	932	1239	0.1933	0.807	2.23	4.173	0.5048	0.75	0.2077	0.623	32.7173	40.3789	0.0409	1.5299	0.2957	1.2342	0.6112	0.309	0.8067	0.4952	0.3995	0.5048	0.2017	300	57.9897	242.01	119.845	60.5026	1552	300	1252	620	313	0.6536	4.173	0.981	2.676	1.0195
Initial heading	N2	1	L2	700	36492	290	1485	1195	325	354	510	931	1165	0.1953	0.805	2.0876	4.121	0.5364	0.7322	0.2427	0.6137	30.5372	34.9359	0.0436	1.4217	0.2776	1.144	0.5304	0.306	0.8047	0.4636	0.3731	0.5776	0.2155	290	56.633	233.367	108.189	62.4916	1485	290	1195	554	320	0.7034	4.121	0.8643	2.505	1.3675
Initial heading	N2	1	L3	800	42560	272	1463	1191	296	316	432	824	1138	0.1859	0.814	3.559	4.379	0.4635	0.7271	0.1679	0.4478	35.7346	34.5262	0.0447	1.1868	0.2207	0.9662	0.5184	0.264	0.8141	0.5365	0.4368	0.5086	0.2221	272	50.5701	221.43	118.802	60.4238	1463	272	1191	639	325	0.8426	4.379	1.1576	4.271	1.035
Initial heading	N2	1	L4	900	66578	258	1322	1064	279	297	390	680	937	0.1952	0.805	4.0358	4.124	0.3966	0.6382	0.1692	0.4135	62.5729	65.2418	0.0695	1.2955	0.2528	1.0427	0.6291	0.377	0.8048	0.6034	0.4856	0.5997	0.2912	258	50.351	207.649	125.292	75.1362	1322	258	1064	642	385	0.7719	4.124	1.5213	4.843	1.4981
Initial heading	N2	2	L1	600	29197	294	1491	1197	331	363	533	993	1227	0.1972	0.803	1.7027	4.071	0.584	0.7794	0.2673	0.6656	24.3922	27.8004	0.0407	1.4197	0.2799	1.1397	0.4742	0.251	0.8028	0.416	0.334	0.5301	0.1771	294	57.9718	236.028	98.1972	52.0563	1491	294	1197	498	264	0.7044	4.071	0.7124	2.043	1.1282
Initial heading	N2	2	L2	700	43406	286	1486	1200	315	339	470	821	1160	0.1925	0.808	3.0614	4.196	0.4458	0.7283	0.2	0.5111	36.1715	41.4677	0.0517	1.4196	0.2732	1.1464	0.6353	0.311	0.8075	0.5542	0.4475	0.4902	0.2194	286	55.0444	230.956	127.988	62.7429	1486	286	1200	665	326	0.7044	4.196	1.243	3.674	0.9617
Initial heading	N2	2	L3	800	31182	269	1253	984	305	339	498	882	939	0.2147	0.785	1.1635	3.658	0.623	0.6809	0.3455	0.7757	31.6891	39.4606	0.0396	1.5857	0.3404	1.2452	0.4695	0.397	0.7853	0.377	0.2961	0.8464	0.2506	269	57.7502	211.25	79.648	67.411	1253	269	984	371	314	0.6307	3.658	0.6052	1.396	5.5088
Initial heading	N2	2	L4	260	22461	282	1108	826	311	337	467	794	824	0.2545	0.745	0.9266	2.929	0.6199	0.6562	0.3148	0.7466	27.1925	32.7514	0.1046	1.6156	0.4112	1.2044	0.4579	0.414	0.7455	0.3801	0.2834	0.9045	0.2563	282	71.7726	210.227	79.917	72.2816	1108	282	826	314	284	0.619	2.929	0.6133	1.112	9.4667
Initial heading	N2	3	L1	700	33400	313	1497	1184	355	390	568	924	1226	0.2091	0.791	1.6807	3.783	0.516	0.7711	0.2956	0.7179	28.2095	39.244	0.0403	1.7589	0.3678	1.3912	0.6733	0.318	0.7909	0.484	0.3828	0.4729	0.181	313	65.4436	247.556	119.806	56.662	1497	313	1184	573	271	0.5685	3.783	0.9378	2.017	0.8974
Initial heading	N2	3	L2	260	21645	319	1287	968	358	391	552	885	1010	0.2479	0.752	0.9844	3.034	0.5847	0.7138	0.3409	0.8023	22.3608	30.6836	0.086	1.8244	0.4522	1.3722	0.5699	0.393	0.7521	0.4153	0.3124	0.6891	0.2152	319	79.0684	239.932	99.641	68.6581	1287	319	968	402	277	0.5481	3.034	0.7102	1.181	2.216
Initial heading	N2	3	L3	400	29399	284	1337	1053	323	359	533	912	969	0.2124	0.788	1.2461	3.708	0.5964	0.6505	0.3419	0.7882	27.9192	36.8995	0.0698	1.6781	0.3565	1.3217	0.5334	0.462	0.7876	0.4036	0.3179	0.8659	0.2752	284	60.3261	223.674	90.2767	78.169	1337	284	1053	425	368	0.5959	3.708	0.6768	1.495	6.4561
Initial heading	N2	3	L4	600	33671	268	1205	937	294	315	423	677	729	0.2224	0.778	2.3153	3.496	0.4365	0.492	0.2241	0.5514	35.9353	45.395	0.0599	1.6246	0.3613	1.2632	0.7118	0.642	0.7776	0.5635	0.4382	0.9015	0.395	268	59.605	208.395	117.431	105.866	1205	268	937	528	476	0.6156	3.496	1.291	2.778	9.1538
Initial heading	N2	4	L1	600	22863	362	1414	1052	414	456	662	1071	1152	0.256	0.744	0.618	2.906	0.674	0.751	0.3992	0.9506	21.7328	30.6527	0.0362	1.8958	0.4853	1.4104	0.4599	0.351	0.744	0.326	0.2426	0.7638	0.1853	362	92.6761	269.324	87.8119	67.075	1414	362	1052	343	262	0.5275	2.906	0.4838	0.742	3.2346
Initial heading	N2	4	L2	500	25525	295	1339	1044	337	368	547	927	1012	0.2203	0.78	1.1278	3.539	0.6054	0.6868	0.2969	0.8046	24.4496	32.4963	0.0489	1.7047	0.3756	1.3291	0.5245	0.416	0.7797	0.3946	0.3077	0.7937	0.2442	295	64.9925	230.007	90.7692	72.0426	1339	295	1044	412	327	0.5866	3.539	0.6519	1.353	3.8471
Initial heading	N2	4	L3	700	33577	310	1253	943	350	386	562	955	873	0.2474	0.753	0.6768	3.042	0.684	0.597	0.3818	0.8908	35.6062	46.3709	0.0509	1.7304	0.4281	1.3023	0.4116	0.525	0.7526	0.316	0.2378	1.2752	0.3033	310	76.6959	233.304	73.7271	94.0144	1253	310	943	298	380	0.5779	3.042	0.462	0.812	-4.6341
Initial heading	N2	4	L4	600	27461	324	1310	986	373	415	628	1020	942	0.2473	0.753	0.5463	3.043	0.7059	0.6268	0.426	1.0277	27.8505	40.5486	0.0464	1.9344	0.4784	1.4559	0.4282	0.543	0.7527	0.2941	0.2214	1.269	0.2809	324	80.1344	243.866	71.7252	91.0168	1310	324	986	290	368	0.517	3.043	0.4167	0.656	-4.7179
Growth stage	Nitrogen level	Sample No.	Leaf position	t for Fm	Area	Fo	Fm	Fv	F1	F2	F3	F4	F5	Fo/Fm	Fv/Fm	PI Inst.	Fv/Fo	Vj	Vi	dVG/dto	dV/dto	Sm	N	Sm/t(Fm)	ABS/RC	DIo/RC	TRo/RC	ETo/RC	REo/RC	phi(Po)	psi(Eo)	phi(Eo)	delta(Ro)	phi(Ro)	ABS/CSo	DIo/CSo	TRo/CSo	ETo/CSo	REo/CSo	ABS/CSm	DIo/CSm	TRo/CSm	ETo/CSm	REo/CSm	gamma(RC)/((1-gamma(RC))	phi(Po)/((1-phi(Po))	psi(Eo)/(1-psi(Eo))	PI abs	dRo/(1-dRo)
Heading	N0	1	L1	900	33066	251	1167	916	282	310	450	732	920	0.2151	0.785	1.5654	3.649	0.5251	0.7303	0.3057	0.7242	36.0983	49.7821	0.0401	1.757	0.3779	1.3791	0.6549	0.372	0.7849	0.4749	0.3728	0.5678	0.2117	251	53.9854	197.015	93.5604	53.1251	1167	251	916	435	247	0.5692	3.649	0.9044	1.878	1.3138
Heading	N0	1	L2	900	37726	263	1326	1063	303	341	504	763	1074	0.1983	0.802	1.8923	4.042	0.4704	0.7629	0.3575	0.7557	35.4899	57.0204	0.0394	2.0042	0.3975	1.6067	0.8509	0.381	0.8017	0.5296	0.4246	0.4476	0.19	263	52.1637	210.836	111.666	49.9819	1326	263	1063	563	252	0.499	4.042	1.126	2.271	0.8103
Heading	N0	1	L3	900	36130	272	1228	956	303	328	454	746	984	0.2215	0.779	1.8116	3.515	0.4958	0.7448	0.2615	0.6346	37.7927	48.3704	0.042	1.644	0.3642	1.2799	0.6453	0.327	0.7785	0.5042	0.3925	0.5062	0.1987	272	60.2476	211.752	106.762	54.0456	1228	272	956	482	244	0.6083	3.515	1.0169	2.174	1.0252
Heading	N0	1	L4	260	16253	299	1163	864	335	368	531	859	965	0.2571	0.743	0.7032	2.89	0.6481	0.7708	0.3819	0.8951	18.8111	25.9772	0.0724	1.8589	0.4779	1.381	0.4859	0.316	0.7429	0.3519	0.2614	0.6513	0.1702	299	76.871	222.129	78.1565	50.9046	1163	299	864	304	198	0.538	2.89	0.5429	0.844	1.8679
Heading	N0	1	L5	600	14848	297	1220	923	329	360	471	696	1097	0.2434	0.757	1.7701	3.108	0.4323	0.8667	0.3359	0.6284	16.0869	23.3844	0.0268	1.9214	0.4677	1.4536	0.8252	0.194	0.7566	0.5677	0.4295	0.2347	0.1008	297	72.3025	224.697	127.564	29.9434	1220	297	923	524	123	0.5205	3.108	1.3133	2.124	0.3067
Heading	N0	2	L1	600	25884	252	1370	1118	309	356	565	840	1195	0.1839	0.816	1.5326	4.437	0.5259	0.8435	0.4204	0.9332	23.152	41.0804	0.0386	2.1743	0.3999	1.7744	0.8412	0.278	0.8161	0.4741	0.3869	0.3302	0.1277	252	46.3533	205.647	97.4891	32.1898	1370	252	1118	530	175	0.4599	4.437	0.9014	1.839	0.493
Heading	N0	2	L2	300	19814	272	1388	1116	312	346	519	885	1174	0.196	0.804	1.6795	4.103	0.5493	0.8082	0.3047	0.7378	17.7543	23.8462	0.0592	1.6705	0.3274	1.3431	0.6054	0.258	0.804	0.4507	0.3624	0.4254	0.1542	272	53.3026	218.697	98.5706	41.9366	1388	272	1116	503	214	0.5986	4.103	0.8206	2.015	0.7405
Heading	N0	2	L3	300	22010	290	1337	1047	330	364	533	862	1100	0.2169	0.783	1.3816	3.61	0.5463	0.7736	0.3247	0.7736	21.0221	29.7691	0.0701	1.8083	0.3922	1.4161	0.6424	0.321	0.7831	0.4537	0.3553	0.4989	0.1773	290	62.902	227.098	103.029	51.4061	1337	290	1047	475	237	0.553	3.61	0.8304	1.658	0.9958
Heading	N0	2	L4	280	21433	280	1238	958	315	346	497	817	996	0.2262	0.774	1.2841	3.421	0.5605	0.7474	0.3236	0.755	22.3727	30.1358	0.0799	1.7407	0.3937	1.347	0.5919	0.34	0.7738	0.4395	0.3401	0.5748	0.1955	280	63.3279	216.672	95.2181	54.7334	1238	280	958	421	242	0.5745	3.421	0.784	1.541	1.352
Heading	N0	2	L5	290	23930	271	1222	951	301	333	454	717	923	0.2218	0.778	1.8841	3.509	0.469	0.6856	0.3365	0.6414	25.1632	34.416	0.0868	1.7575	0.3897	1.3677	0.7263	0.43	0.7782	0.531	0.4133	0.5921	0.2447	271	60.099	210.901	111.993	66.3085	1222	271	951	505	299	0.569	3.509	1.1323	2.261	1.4515
Heading	N0	3	L1	600	23286	258	1333	1075	307	345	548	898	1109	0.1935	0.806	1.2601	4.167	0.5953	0.7916	0.3535	0.8992	21.6613	32.7176	0.0361	1.8729	0.3625	1.5104	0.6112	0.315	0.8065	0.4047	0.3263	0.5149	0.168	258	49.9355	208.065	84.1935	43.3548	1333	258	1075	435	224	0.5339	4.167	0.6797	1.512	1.0616
Heading	N0	3	L2	600	24677	288	1384	1096	347	396	627	979	1165	0.2081	0.792	0.9001	3.806	0.6305	0.8002	0.4471	1.031	22.5155	36.8199	0.0375	2.065	0.4297	1.6353	0.6043	0.327	0.7919	0.3695	0.2926	0.5407	0.1582	288	59.9306	228.069	84.2775	45.5723	1384	288	1096	405	219	0.4843	3.806	0.5861	1.08	1.1774
Heading	N0	3	L3	300	15795	296	1124	828	341	380	566	871	929	0.2633	0.737	0.4827	2.797	0.6944	0.7645	0.471	1.087	19.0766	29.8591	0.0636	2.1248	0.5595	1.5652	0.4783	0.369	0.7367	0.3056	0.2251	0.7708	0.1735	296	77.9502	218.05	66.6263	51.3523	1124	296	828	253	195	0.4706	2.797	0.44	0.579	3.3621
Heading	N0	3	L4	600	26600	285	1238	953	336	377	585	979	939	0.2302	0.77	0.5556	3.344	0.7282	0.6863	0.4302	1.0493	27.9115	40.2183	0.0465	1.8718	0.4309	1.4409	0.3916	0.452	0.7698	0.2718	0.2092	1.1544	0.2415	285	65.6099	219.39	59.6244	68.8328	1238	285	953	259	299	0.5342	3.344	0.3732	0.667	-7.475
Heading	N0	3	L5	300	18161	318	1090	772	352	391	553	885	826	0.2917	0.708	0.375	2.428	0.7345	0.658	0.5052	1.0147	23.525	32.5007	0.0784	1.9506	0.5691	1.3815	0.3669	0.472	0.7083	0.2655	0.1881	1.2878	0.2422	318	92.7743	225.226	59.8073	77.0202	1090	318	772	205	264	0.5127	2.428	0.3616	0.45	-4.4746
Heading	N0	4	L1	700	21484	249	1092	843	292	329	498	767	888	0.228	0.772	0.8528	3.386	0.6145	0.758	0.4389	0.9846	25.4846	40.8344	0.0364	2.0756	0.4733	1.6023	0.6177	0.388	0.772	0.3855	0.2976	0.6277	0.1868	249	56.7775	192.222	74.1071	46.5165	1092	249	843	325	204	0.4818	3.386	0.6274	1.023	1.686
Heading	N0	4	L2	600	18697	274	1308	1034	322	362	561	888	1102	0.2095	0.791	1.0914	3.774	0.5938	0.8008	0.3868	0.9252	18.0818	28.173	0.0301	1.971	0.4129	1.5581	0.6329	0.31	0.7905	0.4062	0.3211	0.4905	0.1575	274	57.3976	216.602	87.9817	43.1529	1308	274	1034	420	206	0.5074	3.774	0.684	1.31	0.9626
Heading	N0	4	L3	900	23730	282	1229	947	334	378	586	932	1036	0.2295	0.771	0.632	3.358	0.6864	0.7962	0.4646	1.07	25.0583	39.0652	0.0278	2.0232	0.4642	1.559	0.4889	0.318	0.7705	0.3136	0.2417	0.6498	0.157	282	64.7063	217.294	68.1481	44.2848	1229	282	947	297	193	0.4943	3.358	0.4569	0.758	1.8558
Heading	N0	4	L4	900	31762	302	1221	919	350	389	588	949	1002	0.2473	0.753	0.5446	3.043	0.704	0.7617	0.4244	1.0374	34.561	50.9245	0.0384	1.9577	0.4842	1.4735	0.4361	0.351	0.7527	0.296	0.2228	0.8051	0.1794	302	74.6962	227.304	67.276	54.1671	1221	302	919	272	219	0.5108	3.043	0.4204	0.653	4.1321
Heading	N0	4	L5	900	32158	303	1243	940	346	379	570	954	1017	0.2438	0.756	0.6348	3.102	0.6926	0.7596	0.3511	0.9468	34.2107	46.7704	0.038	1.8078	0.4407	1.3671	0.4203	0.329	0.7562	0.3074	0.2325	0.782	0.1818	303	73.8608	229.139	70.4481	55.0909	1243	303	940	289	226	0.5532	3.102	0.4439	0.762	3.5873
Heading	N1	1	L1	700	36562	289	1409	1120	317	341	444	692	1111	0.2051	0.795	3.5625	3.875	0.3598	0.7339	0.2143	0.4613	32.6446	41.852	0.0466	1.6129	0.3308	1.2821	0.8207	0.341	0.7949	0.6402	0.5089	0.4156	0.2115	289	59.2768	229.723	147.064	61.1228	1409	289	1120	717	298	0.62	3.875	1.7792	4.275	0.7112
Heading	N1	1	L2	900	36567	240	1223	983	268	289	407	724	997	0.1962	0.804	2.4592	4.096	0.4924	0.7701	0.2136	0.5663	37.1992	42.7842	0.0413	1.4309	0.2808	1.1501	0.5838	0.264	0.8038	0.5076	0.408	0.4529	0.1848	240	47.0973	192.903	97.9231	44.35	1223	240	983	499	226	0.6988	4.096	1.031	2.951	0.8278
Heading	N1	1	L3	900	46889	258	1248	990	288	315	447	780	972	0.2067	0.793	1.8843	3.837	0.5273	0.7212	0.2727	0.6364	47.3626	57.1618	0.0526	1.5214	0.3145	1.2069	0.5705	0.336	0.7933	0.4727	0.375	0.5897	0.2212	258	53.3365	204.663	96.75	57.0577	1248	258	990	468	276	0.6573	3.837	0.8966	2.261	1.4375
Heading	N1	1	L4	900	40231	270	1273	1003	300	320	459	825	1027	0.2121	0.788	1.7345	3.715	0.5533	0.7547	0.1994	0.6281	40.1111	45.5315	0.0446	1.4407	0.3056	1.1351	0.507	0.278	0.7879	0.4467	0.3519	0.5491	0.1932	270	57.2663	212.734	95.0196	52.176	1273	270	1003	448	246	0.6941	3.715	0.8072	2.081	1.2178
Heading	N1	1	L5	400	18228	332	1286	954	375	413	586	954	1072	0.2582	0.742	0.6966	2.873	0.652	0.7757	0.3983	0.8875	19.1072	26.0087	0.0478	1.8349	0.4737	1.3612	0.4737	0.305	0.7418	0.348	0.2582	0.6446	0.1664	332	85.7107	246.289	85.7107	55.2473	1286	332	954	332	214	0.545	2.873	0.5338	0.836	1.8136
Heading	N1	2	L1	900	40821	277	1324	1047	301	324	412	628	1070	0.2092	0.791	3.8525	3.78	0.3352	0.7574	0.2197	0.4298	38.9884	49.9852	0.0433	1.6212	0.3392	1.2821	0.8523	0.311	0.7908	0.6648	0.5257	0.3649	0.1918	277	57.9524	219.048	145.613	53.1405	1324	277	1047	696	254	0.6168	3.78	1.9829	4.623	0.5747
Heading	N1	2	L2	800	29073	264	1324	1060	297	327	475	812	1135	0.1994	0.801	1.9501	4.015	0.517	0.8217	0.283	0.6635	27.4278	35.2023	0.0343	1.6031	0.3197	1.2835	0.6199	0.229	0.8006	0.483	0.3867	0.3691	0.1427	264	52.6405	211.359	102.091	37.6858	1324	264	1060	512	189	0.6238	4.015	0.9343	2.34	0.5851
Heading	N1	2	L3	900	39751	293	1335	1042	338	374	564	928	1068	0.2195	0.781	1.0422	3.556	0.6094	0.7438	0.3455	0.8669	38.149	54.2697	0.0424	1.8226	0.4	1.4226	0.5556	0.365	0.7805	0.3906	0.3049	0.656	0.2	293	64.3064	228.694	89.3266	58.6	1335	293	1042	407	267	0.5487	3.556	0.6409	1.251	1.9071
Heading	N1	2	L4	800	27157	274	1239	965	312	344	498	838	984	0.2211	0.779	1.2276	3.522	0.5845	0.7358	0.3316	0.7737	28.1421	37.2567	0.0352	1.6998	0.3759	1.3239	0.5501	0.35	0.7789	0.4155	0.3236	0.6359	0.2058	274	60.594	213.406	88.6796	56.3923	1239	274	965	401	255	0.5883	3.522	0.711	1.473	1.7466
Heading	N1	2	L5	600	19941	310	1306	996	351	387	573	993	1100	0.2374	0.763	0.729	3.213	0.6857	0.7932	0.3614	0.8802	20.0208	25.6978	0.0334	1.6831	0.3995	1.2836	0.4034	0.265	0.7626	0.3143	0.2397	0.6581	0.1577	310	73.5835	236.417	74.2956	48.8974	1306	310	996	313	206	0.5942	3.213	0.4583	0.875	1.9252
Heading	N1	3	L1	600	23404	259	1423	1164	305	344	533	858	1233	0.182	0.818	1.8951	4.494	0.5146	0.8368	0.3351	0.7847	20.1063	30.6573	0.0335	1.864	0.3393	1.5248	0.7401	0.249	0.818	0.4854	0.397	0.3363	0.1335	259	47.1405	211.859	102.836	34.5819	1423	259	1164	565	190	0.5365	4.494	0.9432	2.274	0.5067
Heading	N1	3	L2	500	25168	272	1573	1301	315	348	525	890	1339	0.1729	0.827	2.6699	4.783	0.475	0.8201	0.2537	0.6482	19.3452	26.3987	0.0387	1.6499	0.2853	1.3646	0.7164	0.245	0.8271	0.525	0.4342	0.3426	0.1488	272	47.0337	224.966	118.103	40.4628	1573	272	1301	683	234	0.6061	4.783	1.1052	3.204	0.5212
Heading	N1	3	L3	700	30995	249	1267	1018	279	307	448	788	1072	0.1965	0.803	1.9767	4.088	0.5295	0.8084	0.275	0.6516	30.4466	37.4699	0.0435	1.5317	0.301	1.2307	0.5791	0.236	0.8035	0.4705	0.3781	0.4071	0.1539	249	48.9353	200.065	94.1365	38.3228	1267	249	1018	479	195	0.6529	4.088	0.8887	2.372	0.6866
Heading	N1	3	L4	700	37124	307	1642	1335	355	396	600	1000	1373	0.187	0.813	1.9367	4.349	0.5191	0.7985	0.3071	0.7316	27.8084	39.1913	0.0397	1.7334	0.3241	1.4093	0.6777	0.284	0.813	0.4809	0.391	0.419	0.1638	307	57.3989	249.601	120.033	50.2942	1642	307	1335	642	269	0.5769	4.349	0.9264	2.324	0.7212
Heading	N1	3	L5	280	15396	338	1156	818	387	433	626	1013	937	0.2924	0.708	0.2126	2.42	0.8252	0.7323	0.5623	1.1736	18.8217	26.7686	0.0672	2.0099	0.5877	1.4222	0.2486	0.381	0.7076	0.1748	0.1237	1.5315	0.1894	338	98.827	239.173	41.8114	64.0329	1156	338	818	143	219	0.4975	2.42	0.2119	0.255	-2.8816
Heading	N1	4	L1	700	32178	276	1392	1116	321	361	536	816	1177	0.1983	0.802	1.7954	4.043	0.4839	0.8073	0.3584	0.7766	28.872	46.3378	0.0412	2.0019	0.3969	1.6049	0.8284	0.309	0.8017	0.5161	0.4138	0.3733	0.1545	276	54.7241	221.276	114.207	42.6293	1392	276	1116	576	215	0.4995	4.043	1.0667	2.155	0.5956
Heading	N1	4	L2	700	29174	264	1256	992	301	333	493	803	1051	0.2102	0.79	1.4677	3.758	0.5433	0.7933	0.3226	0.7695	29.4485	41.7051	0.0421	1.7931	0.3769	1.4162	0.6467	0.293	0.7898	0.4567	0.3607	0.4525	0.1632	264	55.4904	208.51	95.2166	43.0892	1256	264	992	453	205	0.5577	3.758	0.8404	1.761	0.8266
Heading	N1	4	L3	600	21465	289	1193	904	337	373	568	903	1036	0.2422	0.758	0.6159	3.128	0.6792	0.8263	0.3982	1.0288	23.7825	36.0224	0.0396	1.9989	0.4842	1.5147	0.4859	0.263	0.7578	0.3208	0.2431	0.5414	0.1316	289	70.0092	218.991	70.2515	38.0327	1193	289	904	290	157	0.5003	3.128	0.4723	0.739	1.1805
Heading	N1	4	L4	500	18953	307	1261	954	363	415	632	1012	1136	0.2435	0.757	0.4503	3.107	0.739	0.869	0.5451	1.1356	19.9047	30.5864	0.0398	2.0311	0.4945	1.5366	0.4011	0.201	0.7565	0.261	0.1975	0.502	0.0991	307	74.7415	232.258	60.6209	30.4322	1261	307	954	249	125	0.4923	3.107	0.3532	0.54	1.0081
Heading	N1	4	L5	900	32982	336	1292	956	376	411	587	1014	1054	0.2601	0.74	0.5829	2.845	0.7092	0.751	0.3661	0.8752	34.539	42.6219	0.0384	1.6677	0.4337	1.234	0.3588	0.307	0.7399	0.2908	0.2152	0.8561	0.1842	336	87.3808	248.619	72.2972	61.8947	1292	336	956	278	238	0.5996	2.845	0.41	0.7	5.95
Heading	N2	1	L1	500	32999	310	1615	1305	351	387	560	927	1355	0.192	0.808	2.3403	4.21	0.4728	0.8008	0.2759	0.6386	25.2866	34.1527	0.0506	1.6715	0.3208	1.3506	0.7121	0.269	0.808	0.5272	0.426	0.3779	0.161	310	59.5046	250.495	132.062	49.9071	1615	310	1305	688	260	0.5983	4.21	1.1151	2.808	0.6075
Heading	N2	1	L2	800	36774	308	1546	1238	343	376	539	895	1281	0.1992	0.801	2.2677	4.019	0.4742	0.7859	0.2666	0.622	29.7043	38.9647	0.0371	1.6381	0.3263	1.3118	0.6898	0.281	0.8008	0.5258	0.4211	0.4071	0.1714	308	61.3609	246.639	129.695	52.7943	1546	308	1238	651	265	0.6105	4.019	1.109	2.721	0.6865
Heading	N2	1	L3	600	27464	282	1417	1135	313	339	475	790	1162	0.199	0.801	2.6183	4.025	0.4476	0.7753	0.2291	0.5668	24.1974	30.6436	0.0403	1.5811	0.3146	1.2664	0.6996	0.285	0.801	0.5524	0.4425	0.4067	0.18	282	56.1214	225.879	124.781	50.7481	1417	282	1135	627	255	0.6325	4.025	1.2343	3.142	0.6855
Heading	N2	1	L4	800	26726	275	1237	962	313	345	510	852	996	0.2223	0.778	1.1142	3.498	0.5998	0.7495	0.3326	0.8143	27.7822	37.717	0.0347	1.7457	0.3881	1.3576	0.5433	0.34	0.7777	0.4002	0.3112	0.626	0.1948	275	61.1358	213.864	85.5901	53.5772	1237	275	962	385	241	0.5728	3.498	0.6672	1.337	1.6736
Heading	N2	1	L5	300	24971	317	1250	933	359	395	571	956	927	0.2536	0.746	0.6357	2.943	0.6849	0.6538	0.3859	0.9075	26.7641	35.4621	0.0892	1.7752	0.4502	1.325	0.4175	0.459	0.7464	0.3151	0.2352	1.0986	0.2584	317	80.3912	236.609	74.5584	81.9128	1250	317	933	294	323	0.5633	2.943	0.4601	0.763	-11.1379
Heading	N2	2	L1	800	35006	268	1295	1027	300	327	467	771	1039	0.2069	0.793	2.0006	3.832	0.4898	0.7507	0.2629	0.6459	34.0857	44.9507	0.0426	1.6629	0.3441	1.3188	0.6729	0.329	0.7931	0.5102	0.4046	0.4885	0.1977	268	55.4625	212.537	108.442	52.9792	1295	268	1027	524	256	0.6014	3.832	1.0417	2.401	0.9552
Heading	N2	2	L2	800	35380	255	1239	984	280	299	409	723	979	0.2058	0.794	2.5671	3.859	0.4756	0.7358	0.1931	0.5217	35.9552	39.4381	0.0449	1.3811	0.2842	1.0969	0.5752	0.29	0.7942	0.5244	0.4165	0.5039	0.2098	255	52.4818	202.518	106.198	53.5109	1239	255	984	516	260	0.7241	3.859	1.1026	3.081	1.0156
Heading	N2	2	L3	900	27426	222	958	736	247	267	379	639	771	0.2317	0.768	1.2938	3.315	0.5666	0.7459	0.2717	0.7111	37.2632	46.7651	0.0414	1.6335	0.3785	1.255	0.5439	0.319	0.7683	0.4334	0.333	0.5862	0.1952	222	51.4447	170.555	73.9228	43.334	958	222	736	319	187	0.6122	3.315	0.765	1.553	1.4167
Heading	N2	2	L4	900	37712	286	1258	972	323	351	504	849	1036	0.2273	0.773	1.2317	3.399	0.5792	0.7716	0.2881	0.7476	38.7986	50.0775	0.0431	1.6705	0.3798	1.2907	0.5431	0.295	0.7727	0.4208	0.3251	0.5428	0.1765	286	65.0207	220.979	92.9841	50.4706	1258	286	972	409	222	0.5986	3.399	0.7265	1.478	1.1872
Heading	N2	2	L5	700	18847	320	1148	828	365	403	584	973	941	0.2787	0.721	0.3093	2.587	0.7886	0.75	0.4589	1.0628	22.7623	30.675	0.0325	1.8684	0.5208	1.3476	0.2848	0.337	0.7213	0.2114	0.1524	1.1829	0.1803	320	89.1986	230.801	48.7805	57.7003	1148	320	828	175	207	0.5352	2.587	0.268	0.371	-6.4688
Heading	N2	3	L1	800	32820	269	1288	1019	300	327	474	815	1043	0.2089	0.791	1.7287	3.788	0.5358	0.7596	0.265	0.6706	32.2471	40.358	0.0403	1.5819	0.3304	1.2515	0.5809	0.301	0.7911	0.4642	0.3672	0.518	0.1902	269	56.1809	212.819	98.7865	51.1685	1288	269	1019	473	245	0.6321	3.788	0.8663	2.074	1.0746
Heading	N2	3	L2	800	32265	285	1517	1232	322	348	521	926	1265	0.1879	0.812	2.1979	4.323	0.5203	0.7955	0.211	0.6385	26.2279	32.1881	0.0328	1.5112	0.2839	1.2272	0.5887	0.251	0.8121	0.4797	0.3896	0.4264	0.1661	285	53.5432	231.457	111.032	47.3434	1517	285	1232	591	252	0.6617	4.323	0.922	2.637	0.7434
Heading	N2	3	L3	900	31476	293	1267	974	335	369	550	915	1062	0.2313	0.769	0.875	3.324	0.6386	0.7895	0.3491	0.8795	32.3545	44.5611	0.0359	1.7916	0.4143	1.3773	0.4977	0.29	0.7687	0.3614	0.2778	0.5824	0.1618	293	67.7577	225.242	81.4017	47.4073	1267	293	974	352	205	0.5582	3.324	0.5659	1.05	1.3946
Heading	N2	3	L4	900	36477	262	1166	904	293	317	453	819	966	0.2247	0.775	1.215	3.45	0.6162	0.7788	0.2655	0.7043	40.3899	46.1668	0.0449	1.4743	0.3313	1.143	0.4388	0.253	0.7753	0.3838	0.2976	0.5764	0.1715	262	58.8714	203.129	77.9708	44.94	1166	262	904	347	200	0.6783	3.45	0.623	1.458	1.3605
Heading	N2	3	L5	700	23226	320	1186	866	362	397	566	919	983	0.2698	0.73	0.5362	2.706	0.6917	0.7656	0.4042	0.9469	26.8586	36.7681	0.0384	1.8748	0.5058	1.3689	0.4221	0.321	0.7302	0.3083	0.2251	0.7603	0.1712	320	86.3406	233.659	72.0405	54.7723	1186	320	866	267	203	0.5334	2.706	0.4457	0.643	3.1719
Heading	N2	4	L1	800	33892	272	1301	1029	305	332	471	793	1083	0.2091	0.791	1.9096	3.783	0.5063	0.7881	0.2624	0.6446	32.9755	41.9842	0.0412	1.6097	0.3365	1.2732	0.6286	0.27	0.7909	0.4937	0.3905	0.4291	0.1676	272	56.867	215.133	106.207	45.5772	1301	272	1029	508	218	0.6212	3.783	0.975	2.291	0.7517
Heading	N2	4	L2	600	25870	301	1498	1197	339	365	535	921	1311	0.2009	0.799	1.9589	3.977	0.518	0.8438	0.2172	0.6516	21.6513	27.2387	0.0361	1.5744	0.3164	1.2581	0.6064	0.197	0.7991	0.482	0.3852	0.3241	0.1248	301	60.4813	240.519	115.939	37.5748	1498	301	1197	577	187	0.6352	3.977	0.9306	2.351	0.4795
Heading	N2	4	L3	700	24266	292	1249	957	321	347	462	706	1083	0.2338	0.766	2.0053	3.277	0.4326	0.8265	0.2717	0.5921	25.3952	34.76	0.0363	1.7864	0.4176	1.3688	0.7766	0.237	0.7662	0.5674	0.4347	0.3057	0.1329	292	68.2658	223.734	126.946	38.8086	1249	292	957	543	166	0.5598	3.277	1.3116	2.406	0.4403
Heading	N2	4	L4	800	31454	281	1192	911	314	344	484	775	1001	0.2357	0.764	1.2724	3.242	0.5423	0.7903	0.3293	0.7428	34.5659	47.3474	0.0432	1.7923	0.4225	1.3698	0.627	0.287	0.7643	0.4577	0.3498	0.458	0.1602	281	66.2424	214.758	98.3029	45.026	1192	281	911	417	191	0.5579	3.242	0.8441	1.527	0.8451
Heading	N2	4	L5	900	23151	308	1126	818	347	384	553	932	979	0.2735	0.726	0.3819	2.656	0.7628	0.8203	0.4523	0.9984	28.3404	37.0909	0.0315	1.8015	0.4928	1.3088	0.3104	0.235	0.7265	0.2372	0.1723	0.7577	0.1306	308	84.2487	223.751	53.0657	40.2096	1126	308	818	194	147	0.5551	2.656	0.3109	0.458	3.1277
Growth stage	Nitrogen level	Sample No.	Leaf position	t for Fm	Area	Fo	Fm	Fv	F1	F2	F3	F4	F5	Fo/Fm	Fv/Fm	PI Inst.	Fv/Fo	Vj	Vi	dVG/dto	dV/dto	Sm	N	Sm/t(Fm)	ABS/RC	DIo/RC	TRo/RC	ETo/RC	REo/RC	phi(Po)	psi(Eo)	phi(Eo)	delta(Ro)	phi(Ro)	ABS/CSo	DIo/CSo	TRo/CSo	ETo/CSo	REo/CSo	ABS/CSm	DIo/CSm	TRo/CSm	ETo/CSm	REo/CSm	gamma(RC)/((1-gamma(RC))	phi(Po)/((1-phi(Po))	psi(Eo)/(1-psi(Eo))	PI abs	dRo/(1-dRo)
Initial filling	N0	1	L1	500	18472	271	1181	910	313	348	513	759	983	0.2295	0.771	1.128	3.358	0.5363	0.7824	0.3846	0.8864	20.299	33.5543	0.0406	2.1453	0.4923	1.653	0.7666	0.36	0.7705	0.4637	0.3573	0.4692	0.1677	271	62.1854	208.815	96.8349	45.4344	1181	271	910	422	198	0.4661	3.358	0.8648	1.354	0.8839
Initial filling	N0	1	L2	210	11160	287	1167	880	362	428	672	902	1003	0.2459	0.754	0.3979	3.066	0.6989	0.8136	0.75	1.4583	12.6824	26.4645	0.0604	2.7673	0.6806	2.0867	0.6284	0.389	0.7541	0.3011	0.2271	0.6189	0.1405	287	70.5818	216.418	65.1714	40.3325	1167	287	880	265	164	0.3614	3.066	0.4309	0.477	1.6238
Initial filling	N0	1	L3	900	31982	287	1153	866	318	355	470	646	950	0.2489	0.751	1.5697	3.017	0.4145	0.7656	0.4273	0.7044	36.9305	62.7509	0.041	2.2623	0.5631	1.6992	0.9948	0.398	0.7511	0.5855	0.4397	0.4004	0.1761	287	71.4389	215.561	126.2	50.5299	1153	287	866	507	203	0.442	3.017	1.4123	1.884	0.6678
Initial filling	N0	1	L4	140	11822	291	1008	717	327	361	490	688	826	0.2887	0.711	0.7046	2.464	0.5537	0.7462	0.4742	0.9252	16.4885	27.5501	0.1178	2.349	0.6781	1.6709	0.7457	0.424	0.7113	0.4463	0.3175	0.5687	0.1806	291	84.0089	206.991	92.381	52.5417	1008	291	717	320	182	0.4257	2.464	0.806	0.845	1.3188
Initial filling	N0	1	L5	290	4820	199	535	336	238	278	381	440	492	0.372	0.628	0.1384	1.688	0.7173	0.872	1.1905	1.8056	14.3464	36.1141	0.0495	4.0082	1.4909	2.5173	0.7117	0.322	0.628	0.2827	0.1776	0.4526	0.0804	199	74.0206	124.979	35.3364	15.9944	535	199	336	95	43	0.2495	1.688	0.3942	0.166	0.8269
Initial filling	N0	2	L1	280	11219	229	931	702	290	349	530	684	794	0.246	0.754	0.4742	3.066	0.6481	0.8048	0.8405	1.4292	15.9809	35.2399	0.0571	2.9245	0.7193	2.2051	0.7759	0.43	0.754	0.3519	0.2653	0.5547	0.1472	229	56.3276	172.672	60.7551	33.6982	931	229	702	247	137	0.3419	3.066	0.5429	0.569	1.2455
Initial filling	N0	2	L2	230	12013	234	1041	807	287	330	505	672	906	0.2248	0.775	0.9101	3.449	0.5428	0.8327	0.5328	1.1194	14.8857	30.7004	0.0647	2.6604	0.598	2.0624	0.943	0.345	0.7752	0.4572	0.3545	0.3659	0.1297	234	52.5994	181.401	82.9452	30.3458	1041	234	807	369	135	0.3759	3.449	0.8425	1.092	0.5769
Initial filling	N0	2	L3	230	12603	261	1159	898	315	358	559	827	969	0.2252	0.775	0.7425	3.441	0.6303	0.7884	0.4788	1.1062	14.0341	24.6299	0.061	2.2651	0.5101	1.755	0.6488	0.371	0.7748	0.3697	0.2865	0.5723	0.1639	261	58.7757	202.224	74.7645	42.7869	1159	261	898	332	190	0.4415	3.441	0.5866	0.891	1.338
Initial filling	N0	2	L4	160	14503	267	1007	740	306	341	482	652	786	0.2651	0.735	0.8407	2.772	0.5203	0.7014	0.473	0.9685	19.5984	36.4818	0.1225	2.5331	0.6716	1.8615	0.893	0.556	0.7349	0.4797	0.3525	0.6225	0.2195	267	70.7934	196.207	94.1261	58.5968	1007	267	740	355	221	0.3948	2.772	0.9221	1.009	1.6493
Initial filling	N0	2	L5	150	9962	301	907	606	352	392	563	741	724	0.3319	0.668	0.2131	2.013	0.7261	0.698	0.6601	1.4411	16.4388	32.6285	0.1096	2.9707	0.9859	1.9848	0.5437	0.599	0.6681	0.2739	0.183	1.1024	0.2018	301	99.8908	201.109	55.0893	60.731	907	301	606	166	183	0.3366	2.013	0.3773	0.256	-10.7647
Initial filling	N0	3	L1	250	11363	215	880	665	265	313	480	625	750	0.2443	0.756	0.5623	3.093	0.6165	0.8045	0.7218	1.3283	17.0878	36.8153	0.0684	2.851	0.6966	2.1545	0.8262	0.421	0.7557	0.3835	0.2898	0.5098	0.1477	215	52.5284	162.472	62.3011	31.7614	880	215	665	255	130	0.3508	3.093	0.622	0.675	1.04
Initial filling	N0	3	L2	250	9987	324	1239	915	407	483	756	1060	1067	0.2615	0.738	0.216	2.824	0.8044	0.812	0.8306	1.5738	10.9149	21.3552	0.0437	2.6493	0.6928	1.9565	0.3828	0.368	0.7385	0.1956	0.1445	0.9609	0.1388	324	84.7264	239.274	46.8087	44.9782	1239	324	915	179	172	0.3775	2.824	0.2432	0.259	24.5714
Initial filling	N0	3	L3	200	12011	268	1068	800	313	360	541	777	896	0.2509	0.749	0.5959	2.985	0.6362	0.785	0.5875	1.1375	15.014	26.8423	0.0751	2.3867	0.5989	1.7878	0.6503	0.384	0.7491	0.3638	0.2725	0.5911	0.161	268	67.2509	200.749	73.0225	43.161	1068	268	800	291	172	0.419	2.985	0.5717	0.715	1.4454
Initial filling	N0	3	L4	180	11437	312	1181	869	369	417	635	934	983	0.2642	0.736	0.3918	2.785	0.7158	0.7722	0.5524	1.239	13.1608	22.781	0.0731	2.3525	0.6215	1.731	0.492	0.394	0.7358	0.2842	0.2091	0.8016	0.1677	312	82.4251	229.575	65.2532	52.3082	1181	312	869	247	198	0.4251	2.785	0.3971	0.47	4.0408
Initial filling	N0	3	L5	180	13961	295	1170	875	335	375	528	781	973	0.2521	0.748	0.9259	2.966	0.5554	0.7749	0.4571	0.8876	15.9559	25.4989	0.0886	2.1369	0.5388	1.5981	0.7105	0.36	0.7479	0.4446	0.3325	0.5064	0.1684	295	74.3803	220.62	98.0812	49.6709	1170	295	875	389	197	0.468	2.966	0.8004	1.111	1.026
Initial filling	N0	4	L1	300	14843	230	873	643	267	302	407	516	756	0.2635	0.737	1.0383	2.796	0.4448	0.818	0.5443	0.9176	23.084	47.6209	0.0769	2.8008	0.7379	2.0629	1.1454	0.375	0.7365	0.5552	0.4089	0.3277	0.134	230	60.5956	169.404	94.055	30.8247	873	230	643	357	117	0.357	2.796	1.2483	1.246	0.4875
Initial filling	N0	4	L2	270	18860	294	1203	909	350	403	626	934	983	0.2444	0.756	0.4732	3.092	0.7041	0.758	0.5831	1.2175	20.7483	35.8773	0.0768	2.2884	0.5593	1.7292	0.5117	0.419	0.7556	0.2959	0.2236	0.8178	0.1829	294	71.8504	222.15	65.7406	53.7656	1203	294	909	269	220	0.437	3.092	0.4203	0.568	4.4898
Initial filling	N0	4	L3	290	18225	307	1211	904	352	393	583	896	1004	0.2535	0.746	0.6272	2.945	0.6515	0.771	0.4535	1.0177	20.1608	31.4905	0.0695	2.0924	0.5304	1.562	0.5443	0.358	0.7465	0.3485	0.2601	0.6571	0.1709	307	77.8274	229.173	79.8555	52.4765	1211	307	904	315	207	0.4779	2.945	0.5348	0.753	1.9167
Initial filling	N0	4	L4	230	13730	354	1312	958	427	492	758	1111	1111	0.2698	0.73	0.2458	2.706	0.7902	0.7902	0.6785	1.4057	14.3315	25.495	0.0623	2.4363	0.6574	1.779	0.3732	0.373	0.7302	0.2098	0.1532	1	0.1532	354	95.5152	258.485	54.2332	54.2332	1312	354	958	201	201	0.4105	2.706	0.2655	0.295	INF
Initial filling	N0	4	L5	500	22113	373	1232	859	409	444	594	879	952	0.3028	0.697	0.6412	2.303	0.5891	0.674	0.4075	0.8576	25.7432	37.4786	0.0515	2.088	0.6322	1.4559	0.5983	0.475	0.6972	0.4109	0.2865	0.7932	0.2273	373	112.929	260.071	106.874	84.7727	1232	373	859	353	280	0.4789	2.303	0.6976	0.769	3.8356
Initial filling	N1	1	L1	280	18616	286	1275	989	333	374	557	842	1083	0.2243	0.776	1.0715	3.458	0.5622	0.8059	0.4146	0.9134	18.8227	30.5813	0.0672	2.0945	0.4698	1.6247	0.7113	0.315	0.7757	0.4378	0.3396	0.4434	0.1506	286	64.1537	221.846	97.1278	43.0682	1275	286	989	433	192	0.4774	3.458	0.7788	1.286	0.7967
Initial filling	N1	1	L2	400	22819	288	1337	1049	331	365	523	761	1108	0.2154	0.785	1.7511	3.642	0.4509	0.7817	0.3241	0.7467	21.7531	36.0252	0.0544	2.1108	0.4547	1.6561	0.9094	0.362	0.7846	0.5491	0.4308	0.3976	0.1713	288	62.0374	225.963	124.075	49.3283	1337	288	1049	576	229	0.4738	3.642	1.2178	2.101	0.6599
Initial filling	N1	1	L3	240	13656	301	1379	1078	358	410	632	970	1203	0.2183	0.782	0.8649	3.581	0.6206	0.8367	0.4824	1.0235	12.668	20.8924	0.0528	2.1097	0.4605	1.6492	0.6257	0.269	0.7817	0.3794	0.2966	0.4303	0.1276	301	65.7005	235.299	89.2741	38.4162	1379	301	1078	409	176	0.474	3.581	0.6114	1.038	0.7554
Initial filling	N1	1	L4	290	20236	296	1216	920	335	371	527	784	981	0.2434	0.757	1.0994	3.108	0.5304	0.7446	0.3913	0.837	21.9955	34.706	0.0758	2.0855	0.5077	1.5779	0.7409	0.403	0.7566	0.4696	0.3553	0.544	0.1933	296	72.0526	223.947	105.158	57.2039	1216	296	920	432	235	0.4795	3.108	0.8852	1.319	1.1929
Initial filling	N1	1	L5	170	14265	301	1057	756	338	364	509	772	827	0.2848	0.715	0.6154	2.512	0.623	0.6958	0.3439	0.9171	18.8684	27.7751	0.111	2.0581	0.5861	1.472	0.5549	0.448	0.7152	0.377	0.2696	0.807	0.2176	301	85.7152	215.285	81.1589	65.4967	1057	301	756	285	230	0.4859	2.512	0.6051	0.738	4.1818
Initial filling	N1	2	L1	500	22482	294	1311	1017	334	370	530	814	1107	0.2243	0.776	1.4128	3.459	0.5113	0.7994	0.354	0.7735	22.1064	33.4429	0.0442	1.9502	0.4373	1.5128	0.7393	0.303	0.7757	0.4887	0.3791	0.4105	0.1556	294	65.9314	228.069	111.455	45.7483	1311	294	1017	497	204	0.5128	3.459	0.9558	1.695	0.6962
Initial filling	N1	2	L2	290	13137	260	983	723	293	324	449	667	849	0.2645	0.736	0.8549	2.781	0.5629	0.8147	0.4288	0.8714	18.1705	28.1263	0.0627	2.1046	0.5566	1.5479	0.6765	0.287	0.7355	0.4371	0.3215	0.4241	0.1363	260	68.7691	191.231	83.5809	35.4425	983	260	723	316	134	0.4752	2.781	0.7764	1.026	0.7363
Initial filling	N1	2	L3	500	25261	317	1299	982	366	404	591	894	1061	0.244	0.756	0.8654	3.098	0.5876	0.7576	0.387	0.9301	25.7237	40.718	0.0514	2.0939	0.511	1.5829	0.6528	0.384	0.756	0.4124	0.3118	0.5877	0.1832	317	77.3587	239.641	98.8337	58.0801	1299	317	982	405	238	0.4776	3.098	0.7019	1.038	1.4251
Initial filling	N1	2	L4	190	10950	299	979	680	338	371	509	712	825	0.3054	0.695	0.5021	2.274	0.6074	0.7735	0.4853	1.0294	16.1035	27.2941	0.0848	2.4402	0.7453	1.6949	0.6655	0.384	0.6946	0.3926	0.2727	0.5768	0.1573	299	91.3187	207.681	81.5455	47.0337	979	299	680	267	154	0.4098	2.274	0.6465	0.603	1.3628
Initial filling	N1	2	L5	260	20808	338	1243	905	375	407	555	817	918	0.2719	0.728	0.9568	2.678	0.5293	0.6409	0.3536	0.7993	22.9922	34.7204	0.0884	2.0741	0.564	1.5101	0.7108	0.542	0.7281	0.4707	0.3427	0.7629	0.2615	338	91.9099	246.09	115.839	88.3749	1243	338	905	426	325	0.4821	2.678	0.8894	1.148	3.2178
Initial filling	N1	3	L1	400	11357	224	782	558	264	308	435	561	701	0.2864	0.714	0.4654	2.491	0.6039	0.8548	0.7885	1.2605	20.3538	42.4793	0.0509	2.9249	0.8378	2.087	0.8266	0.303	0.7136	0.3961	0.2826	0.3665	0.1036	224	64.1637	159.836	63.3043	23.202	782	224	558	221	81	0.3419	2.491	0.6558	0.559	0.5786
Initial filling	N1	3	L2	290	10993	314	1154	840	350	386	517	738	1053	0.2721	0.728	0.9976	2.675	0.5048	0.8798	0.4286	0.8056	13.0869	20.8855	0.0451	2.1925	0.5966	1.5959	0.7904	0.192	0.7279	0.4952	0.3605	0.2428	0.0875	314	85.4385	228.561	113.192	27.4818	1154	314	840	416	101	0.4561	2.675	0.9811	1.197	0.3206
Initial filling	N1	3	L3	280	14970	256	1137	881	288	317	459	748	970	0.2252	0.775	1.2775	3.441	0.5585	0.8104	0.3292	0.7681	16.9918	23.3694	0.0607	1.775	0.3996	1.3753	0.6073	0.261	0.7748	0.4415	0.3421	0.4293	0.1469	256	57.6394	198.361	87.5849	37.6007	1137	256	881	389	167	0.5634	3.441	0.7907	1.533	0.7523
Initial filling	N1	3	L4	210	16335	241	1073	832	275	305	437	668	846	0.2246	0.775	1.3828	3.452	0.5132	0.7272	0.3606	0.7853	19.6333	30.04	0.0935	1.9733	0.4432	1.5301	0.7448	0.417	0.7754	0.4868	0.3774	0.5605	0.2116	241	54.1295	186.87	90.9646	50.9851	1073	241	832	405	227	0.5068	3.452	0.9485	1.659	1.2753
Initial filling	N1	3	L5	230	23096	283	1105	822	309	334	442	657	758	0.2561	0.744	1.522	2.905	0.455	0.5779	0.3041	0.6448	28.0977	39.8176	0.1222	1.905	0.4879	1.4171	0.7723	0.598	0.7439	0.545	0.4054	0.7746	0.314	283	72.4787	210.521	114.737	88.8697	1105	283	822	448	347	0.5249	2.905	1.1979	1.826	3.4356
Initial filling	N1	4	L1	290	11539	230	866	636	279	324	484	656	786	0.2656	0.734	0.4198	2.765	0.6698	0.8742	0.7075	1.3312	18.1428	36.0585	0.0626	2.7062	0.7187	1.9875	0.6562	0.25	0.7344	0.3302	0.2425	0.381	0.0924	230	61.0855	168.915	55.7737	21.2471	866	230	636	210	80	0.3695	2.765	0.493	0.504	0.6154
Initial filling	N1	4	L2	280	16817	301	1398	1097	355	402	608	902	1220	0.2153	0.785	1.1551	3.645	0.5479	0.8377	0.4284	0.9328	15.3297	26.1022	0.0547	2.1699	0.4672	1.7027	0.7699	0.276	0.7847	0.4521	0.3548	0.3589	0.1273	301	64.8076	236.192	106.793	38.3247	1398	301	1097	496	178	0.4608	3.645	0.8253	1.386	0.5597
Initial filling	N1	4	L3	290	16530	329	1307	978	384	432	643	988	1112	0.2517	0.748	0.5649	2.973	0.6738	0.8006	0.4908	1.0702	16.9015	26.8441	0.0583	2.1226	0.5343	1.5883	0.5181	0.317	0.7483	0.3262	0.2441	0.6113	0.1492	329	82.8164	246.184	80.2992	49.0857	1307	329	978	319	195	0.4711	2.973	0.4841	0.678	1.5726
Initial filling	N1	4	L4	280	15350	270	1111	841	311	345	510	806	937	0.243	0.757	0.7491	3.115	0.6373	0.7931	0.4043	0.9512	18.2521	27.2419	0.0652	1.9717	0.4792	1.4925	0.5413	0.309	0.757	0.3627	0.2745	0.5705	0.1566	270	65.6166	204.383	74.1224	42.2862	1111	270	841	305	174	0.5072	3.115	0.569	0.899	1.3282
Initial filling	N1	4	L5	230	19413	345	1182	837	384	419	575	869	867	0.2919	0.708	0.5845	2.426	0.626	0.6237	0.4182	0.916	23.1935	33.9345	0.1008	2.0662	0.6031	1.4631	0.5471	0.551	0.7081	0.374	0.2648	1.0064	0.2665	345	100.698	244.302	91.3579	91.9416	1182	345	837	313	315	0.484	2.426	0.5973	0.701	-157.5
Initial filling	N2	1	L1	280	15396	243	1062	819	278	310	452	680	931	0.2288	0.771	1.1877	3.37	0.5336	0.84	0.3907	0.8506	18.7989	29.9693	0.0671	2.0672	0.473	1.5942	0.7436	0.255	0.7712	0.4664	0.3597	0.3429	0.1234	243	55.6017	187.398	87.4068	29.9746	1062	243	819	382	131	0.4837	3.37	0.8741	1.425	0.5219
Initial filling	N2	1	L2	290	16570	267	1245	978	304	336	486	771	1087	0.2145	0.786	1.5569	3.663	0.5153	0.8384	0.3272	0.7464	16.9424	24.5396	0.0584	1.8438	0.3954	1.4484	0.702	0.234	0.7855	0.4847	0.3807	0.3333	0.1269	267	57.2602	209.74	101.653	33.8843	1245	267	978	474	158	0.5423	3.663	0.9405	1.868	0.5
Initial filling	N2	1	L3	250	17561	268	1185	917	305	337	486	752	964	0.2262	0.774	1.3148	3.422	0.5278	0.759	0.349	0.7924	19.1505	28.7521	0.0766	1.9402	0.4388	1.5014	0.7089	0.362	0.7738	0.4722	0.3654	0.5104	0.1865	268	60.611	207.389	97.9274	49.9814	1185	268	917	433	221	0.5154	3.422	0.8946	1.578	1.0425
Initial filling	N2	1	L4	190	11738	272	1098	826	313	350	518	801	924	0.2477	0.752	0.6895	3.037	0.6404	0.7893	0.4479	0.9927	14.2104	22.0275	0.0748	2.0605	0.5104	1.5501	0.5574	0.327	0.7523	0.3596	0.2705	0.5859	0.1585	272	67.3807	204.619	73.5738	43.1038	1098	272	826	297	174	0.4853	3.037	0.5614	0.827	1.4146
Initial filling	N2	1	L5	190	18169	271	1059	788	301	327	441	682	785	0.2559	0.744	1.1996	2.908	0.5216	0.6523	0.3299	0.7191	23.0576	31.7907	0.1214	1.8529	0.4742	1.3788	0.6596	0.479	0.7441	0.4784	0.356	0.7268	0.2587	271	69.3494	201.651	96.475	70.1171	1059	271	788	377	274	0.5397	2.908	0.9173	1.439	2.6602
Initial filling	N2	2	L1	300	15351	356	1236	880	416	479	665	866	1096	0.288	0.712	0.5268	2.472	0.5795	0.8409	0.7159	1.1705	17.444	35.2301	0.0581	2.8366	0.817	2.0196	0.8492	0.321	0.712	0.4205	0.2994	0.3784	0.1133	356	102.537	253.463	106.57	40.3236	1236	356	880	370	140	0.3525	2.472	0.7255	0.632	0.6087
Initial filling	N2	2	L2	180	16134	270	926	656	291	307	384	564	701	0.2916	0.708	1.3664	2.43	0.4482	0.657	0.2439	0.5793	24.5949	31.7893	0.1366	1.8245	0.532	1.2925	0.7132	0.443	0.7084	0.5518	0.3909	0.6215	0.243	270	78.7257	191.274	105.551	65.6048	926	270	656	362	225	0.5481	2.43	1.2313	1.64	1.6423
Initial filling	N2	2	L3	400	27378	293	1328	1035	331	363	519	840	1087	0.2206	0.779	1.4862	3.532	0.5285	0.7671	0.3092	0.7279	26.452	36.4299	0.0661	1.7671	0.3899	1.3772	0.6494	0.321	0.7794	0.4715	0.3675	0.4939	0.1815	293	64.6453	228.355	107.669	53.1724	1328	293	1035	488	241	0.5659	3.532	0.8921	1.783	0.9757
Initial filling	N2	2	L4	280	21323	257	1037	780	277	295	382	618	757	0.2478	0.752	1.913	3.035	0.4628	0.641	0.2308	0.5342	27.3378	31.5533	0.0976	1.5345	0.3803	1.1542	0.62	0.414	0.7522	0.5372	0.4041	0.6683	0.27	257	63.6924	193.308	103.841	69.3925	1037	257	780	419	280	0.6517	3.035	1.1607	2.296	2.0144
Initial filling	N2	2	L5	500	21878	360	1389	1029	402	437	619	1009	1161	0.2592	0.741	0.7767	2.858	0.6307	0.7784	0.3401	0.839	21.261	28.2824	0.0425	1.7956	0.4654	1.3303	0.4912	0.295	0.7408	0.3693	0.2736	0.6	0.1641	360	93.3045	266.695	98.4881	59.0929	1389	360	1029	380	228	0.5569	2.858	0.5855	0.932	1.5
Initial filling	N2	3	L1	280	15401	259	1095	836	300	345	501	715	983	0.2365	0.763	0.9674	3.228	0.5455	0.866	0.5383	0.9649	18.4221	32.5887	0.0658	2.3171	0.5481	1.769	0.8041	0.237	0.7635	0.4545	0.347	0.2947	0.1023	259	61.2612	197.739	89.8813	26.4913	1095	259	836	380	112	0.4316	3.228	0.8333	1.161	0.4179
Initial filling	N2	3	L2	280	19117	261	1181	920	291	315	439	697	983	0.221	0.779	1.8666	3.525	0.4739	0.7848	0.2609	0.6449	20.7789	28.2771	0.0742	1.7469	0.3861	1.3609	0.7159	0.293	0.779	0.5261	0.4098	0.4091	0.1677	261	57.6808	203.319	106.964	43.7578	1181	261	920	484	198	0.5724	3.525	1.1101	2.24	0.6923
Initial filling	N2	3	L3	260	16750	267	1079	812	297	325	448	691	872	0.2475	0.753	1.2265	3.041	0.5222	0.7451	0.3448	0.743	20.6282	29.353	0.0793	1.8908	0.4679	1.423	0.6799	0.363	0.7525	0.4778	0.3596	0.5335	0.1918	267	66.0695	200.93	96.0111	51.2224	1079	267	812	388	207	0.5289	3.041	0.9151	1.472	1.1436
Initial filling	N2	3	L4	160	12230	294	1062	768	332	369	517	796	875	0.2768	0.723	0.5633	2.612	0.6536	0.7565	0.4818	0.9679	15.925	23.5808	0.0995	2.0476	0.5668	1.4807	0.5129	0.361	0.7232	0.3464	0.2505	0.703	0.1761	294	81.3898	212.61	73.6384	51.7684	1062	294	768	266	187	0.4884	2.612	0.5299	0.676	2.3671
Initial filling	N2	3	L5	210	20021	297	1106	809	331	362	499	773	784	0.2685	0.731	0.8211	2.724	0.5884	0.602	0.3832	0.8323	24.7473	35.0067	0.1178	1.9339	0.5193	1.4146	0.5823	0.563	0.7315	0.4116	0.3011	0.967	0.2911	297	79.755	217.245	89.4222	86.4684	1106	297	809	333	322	0.5171	2.724	0.6996	0.985	29.2727
Initial filling	N2	4	L1	300	25566	279	1198	919	309	334	453	703	981	0.2329	0.767	1.7971	3.294	0.4614	0.7639	0.272	0.6311	27.8195	38.055	0.0927	1.7832	0.4153	1.3679	0.7368	0.323	0.7671	0.5386	0.4132	0.4384	0.1811	279	64.9758	214.024	115.28	50.5367	1198	279	919	495	217	0.5608	3.294	1.1675	2.156	0.7806
Initial filling	N2	4	L2	270	12863	271	1131	860	317	356	518	710	1011	0.2396	0.76	1.0282	3.173	0.5105	0.8605	0.4535	0.9574	14.9574	28.0522	0.0554	2.4665	0.591	1.8755	0.9181	0.262	0.7604	0.4895	0.3722	0.285	0.1061	271	64.9346	206.065	100.876	28.7533	1131	271	860	421	120	0.4054	3.173	0.959	1.234	0.3987
Initial filling	N2	4	L3	170	13647	353	1241	888	412	469	689	997	998	0.2844	0.716	0.3268	2.516	0.7252	0.7264	0.6419	1.2613	15.3682	26.7274	0.0904	2.4305	0.6913	1.7391	0.4779	0.476	0.7156	0.2748	0.1966	0.9959	0.1958	353	100.41	252.59	69.4053	69.1209	1241	353	888	244	243	0.4114	2.516	0.3789	0.392	243
Initial filling	N2	4	L4	600	33597	295	1165	870	324	351	479	766	827	0.2532	0.747	1.1939	2.949	0.5414	0.6115	0.3103	0.705	38.6172	50.287	0.0644	1.7437	0.4415	1.3022	0.5972	0.506	0.7468	0.4586	0.3425	0.8471	0.2901	295	74.6996	220.3	101.034	85.588	1165	295	870	399	338	0.5735	2.949	0.8471	1.433	5.541
Initial filling	N2	4	L5	270	17954	274	1191	917	312	345	489	729	1050	0.2301	0.77	1.3843	3.347	0.4962	0.8462	0.3599	0.7815	19.5795	30.8395	0.0725	2.0457	0.4706	1.5751	0.7936	0.242	0.7699	0.5038	0.3879	0.3052	0.1184	274	63.0361	210.964	106.287	32.4383	1191	274	917	462	141	0.4888	3.347	1.0154	1.661	0.4393
Growth stage	Nitrogen level	Sample No.	Leaf position	t for Fm	Area	Fo	Fm	Fv	F1	F2	F3	F4	F5	Fo/Fm	Fv/Fm	PI Inst.	Fv/Fo	Vj	Vi	dVG/dto	dV/dto	Sm	N	Sm/t(Fm)	ABS/RC	DIo/RC	TRo/RC	ETo/RC	REo/RC	phi(Po)	psi(Eo)	phi(Eo)	delta(Ro)	phi(Ro)	ABS/CSo	DIo/CSo	TRo/CSo	ETo/CSo	REo/CSo	ABS/CSm	DIo/CSm	TRo/CSm	ETo/CSm	REo/CSm	gamma(RC)/((1-gamma(RC))	phi(Po)/((1-phi(Po))	psi(Eo)/(1-psi(Eo))	PI abs	dRo/(1-dRo)
Filling	N0	1	L1	600	11945	151	535	384	169	185	241	315	419	0.2822	0.718	1.1155	2.543	0.4271	0.6979	0.4167	0.7813	31.1061	56.9015	0.0518	2.5486	0.7193	1.8293	1.048	0.553	0.7178	0.5729	0.4112	0.5273	0.2168	151	42.6187	108.381	62.0935	32.7402	535	151	384	220	116	0.3924	2.543	1.3415	1.339	1.1154
Filling	N0	1	L2	300	9337	152	510	358	182	207	286	352	416	0.298	0.702	0.4874	2.355	0.5587	0.7374	0.6983	1.2477	26.0804	58.2462	0.0869	3.1816	0.9482	2.2333	0.9857	0.586	0.702	0.4413	0.3098	0.5949	0.1843	152	45.302	106.698	47.0902	28.0157	510	152	358	158	94	0.3143	2.355	0.79	0.585	1.4687
Filling	N0	1	L3	210	7415	184	501	317	214	242	326	394	422	0.3673	0.633	0.2054	1.723	0.6625	0.7508	0.8833	1.4932	23.3902	52.7207	0.1114	3.5623	1.3083	2.254	0.7608	0.562	0.6327	0.3375	0.2136	0.7383	0.1577	184	67.5768	116.423	39.2974	29.014	501	184	317	107	79	0.2807	1.723	0.5095	0.246	2.8214
Filling	N0	1	L4	280	4172	172	370	198	195	216	280	339	331	0.4649	0.535	0.0442	1.151	0.8434	0.803	1.0606	1.8182	21.0716	45.4239	0.0753	4.0283	1.8726	2.1557	0.3375	0.425	0.5351	0.1566	0.0838	1.2581	0.1054	172	79.9568	92.0432	14.4108	18.1297	370	172	198	31	39	0.2482	1.151	0.1856	0.053	-4.875
Filling	N0	2	L1	900	22583	195	744	549	219	240	321	435	569	0.2621	0.738	1.2737	2.815	0.4372	0.6812	0.3825	0.765	41.1339	71.9843	0.0457	2.3716	0.6216	1.75	0.985	0.558	0.7379	0.5628	0.4153	0.5663	0.2352	195	51.1089	143.891	80.9879	45.8669	744	195	549	309	175	0.4217	2.815	1.2875	1.528	1.306
Filling	N0	2	L2	700	18307	193	780	587	225	254	345	463	596	0.2474	0.753	1.1934	3.041	0.46	0.6865	0.494	0.8631	31.187	58.5238	0.0446	2.4935	0.617	1.8765	1.0134	0.588	0.7526	0.54	0.4064	0.5804	0.2359	193	47.7551	145.245	78.4372	45.5282	780	193	587	317	184	0.401	3.041	1.1741	1.432	1.3835
Filling	N0	2	L3	400	10521	215	783	568	247	276	393	546	679	0.2746	0.725	0.6379	2.642	0.5827	0.8169	0.5106	1.0446	18.5221	33.2017	0.0463	2.4711	0.6785	1.7925	0.7479	0.328	0.7254	0.4173	0.3027	0.4388	0.1328	215	59.0358	155.964	65.0766	28.5568	783	215	568	237	104	0.4047	2.642	0.716	0.766	0.782
Filling	N0	2	L4	180	5713	221	547	326	245	265	355	485	484	0.404	0.596	0.1017	1.475	0.8098	0.8067	0.6135	1.3701	17.5239	29.649	0.0974	2.8389	1.147	1.6919	0.3218	0.327	0.596	0.1902	0.1133	1.0161	0.1152	221	89.2888	131.711	25.0494	25.4534	547	221	326	62	63	0.3522	1.475	0.2348	0.122	-63
Filling	N0	3	L1	900	17178	157	613	456	180	203	276	350	495	0.2561	0.744	1.1938	2.904	0.4232	0.7412	0.5044	0.8699	37.6716	77.4253	0.0419	2.7629	0.7076	2.0553	1.1854	0.532	0.7439	0.5768	0.429	0.4487	0.1925	157	40.2104	116.79	67.3589	30.2219	613	157	456	263	118	0.3619	2.904	1.3627	1.433	0.8138
Filling	N0	3	L2	800	11641	150	498	348	171	193	253	314	397	0.3012	0.699	0.724	2.32	0.4713	0.7098	0.6322	0.9866	33.4497	70.0269	0.0418	2.9959	0.9024	2.0935	1.1069	0.608	0.6988	0.5287	0.3695	0.5489	0.2028	150	45.1807	104.819	55.4217	30.4217	498	150	348	184	101	0.3338	2.32	1.122	0.869	1.2169
Filling	N0	3	L3	800	9219	188	635	447	232	276	407	487	531	0.2961	0.704	0.2828	2.378	0.6689	0.7673	0.9843	1.6331	20.6232	50.351	0.0258	3.4683	1.0268	2.4415	0.8084	0.568	0.7039	0.3311	0.2331	0.7027	0.1638	188	55.6598	132.34	43.8173	30.7906	635	188	447	148	104	0.2883	2.378	0.495	0.339	2.3636
Filling	N0	3	L4	210	8139	218	682	464	256	293	412	519	576	0.3196	0.68	0.3042	2.128	0.6487	0.7716	0.7974	1.3937	17.5418	37.6867	0.0835	3.1578	1.0094	2.1484	0.7547	0.491	0.6804	0.3513	0.239	0.6503	0.1554	218	69.6833	148.317	52.1026	33.8827	682	218	464	163	106	0.3167	2.128	0.5415	0.365	1.8596
Filling	N0	4	L1	700	12829	149	621	472	194	235	373	464	529	0.2399	0.76	0.4219	3.168	0.6674	0.8051	0.8686	1.5819	27.1809	64.4288	0.0388	3.1186	0.7483	2.3704	0.7884	0.462	0.7601	0.3326	0.2528	0.586	0.1481	149	35.7504	113.25	37.6699	22.0741	621	149	472	157	92	0.3207	3.168	0.4984	0.506	1.4154
Filling	N0	4	L2	400	11715	224	863	639	254	281	398	589	746	0.2596	0.74	0.8315	2.853	0.5712	0.8169	0.4225	0.9077	18.3341	29.1336	0.0458	2.1461	0.557	1.589	0.6814	0.291	0.7404	0.4288	0.3175	0.427	0.1356	224	58.1414	165.859	71.1194	30.3685	863	224	639	274	117	0.466	2.853	0.7507	0.998	0.7452
Filling	N0	4	L3	230	10594	216	708	492	244	273	369	494	584	0.3051	0.695	0.5535	2.278	0.565	0.748	0.5894	1.0366	21.5327	39.5024	0.0936	2.6399	0.8054	1.8345	0.7979	0.462	0.6949	0.435	0.3023	0.5794	0.1751	216	65.8983	150.102	65.2881	37.8305	708	216	492	214	124	0.3788	2.278	0.7698	0.664	1.3778
Filling	N0	4	L4	190	7856	230	659	429	256	281	379	527	548	0.349	0.651	0.2689	1.865	0.6923	0.7413	0.5828	1.1577	18.3134	30.6252	0.0964	2.5688	0.8966	1.6723	0.5145	0.433	0.651	0.3077	0.2003	0.8409	0.1684	230	80.2731	149.727	46.0698	38.7405	659	230	429	132	111	0.3893	1.865	0.4444	0.323	5.2857
Filling	N1	1	L1	900	29617	241	967	726	280	315	451	626	809	0.2492	0.751	0.9181	3.012	0.5303	0.7824	0.4821	0.9642	40.7947	74.1721	0.0453	2.4217	0.6036	1.8182	0.854	0.396	0.7508	0.4697	0.3526	0.4633	0.1634	241	60.0631	180.937	84.9855	39.3775	967	241	726	341	158	0.4129	3.012	0.8857	1.102	0.8634
Filling	N1	1	L2	900	28064	230	995	765	273	313	448	608	808	0.2312	0.769	1.1349	3.326	0.4941	0.7556	0.5229	0.9499	36.6849	70.5229	0.0408	2.5004	0.578	1.9224	0.9725	0.47	0.7688	0.5059	0.3889	0.4832	0.1879	230	53.1658	176.834	89.4573	43.2261	995	230	765	387	187	0.3999	3.326	1.0238	1.362	0.935
Filling	N1	1	L3	210	7473	256	773	517	300	341	491	646	669	0.3312	0.669	0.1825	2.02	0.7544	0.7988	0.793	1.5152	14.4554	29.0344	0.0688	3.0031	0.9946	2.0085	0.4934	0.404	0.6688	0.2456	0.1643	0.8189	0.1345	256	84.7814	171.219	42.0595	34.4424	773	256	517	127	104	0.333	2.02	0.3256	0.219	4.5217
Filling	N1	1	L4	250	5620	232	488	256	248	266	321	416	423	0.4754	0.525	0.1171	1.103	0.7188	0.7461	0.7031	1.1589	21.9517	35.3932	0.0878	3.0735	1.4612	1.6123	0.4535	0.409	0.5246	0.2813	0.1475	0.9028	0.1332	232	110.295	121.705	34.2295	30.9016	488	232	256	72	65	0.3254	1.103	0.3913	0.14	9.2857
Filling	N1	2	L1	900	23714	227	1060	833	280	328	534	780	932	0.2142	0.786	0.6575	3.67	0.6639	0.8463	0.5762	1.2285	28.4679	52.6803	0.0316	2.3548	0.5043	1.8505	0.622	0.284	0.7858	0.3361	0.2642	0.4571	0.1208	227	48.6123	178.388	59.9623	27.4113	1060	227	833	280	128	0.4247	3.67	0.5063	0.789	0.8421
Filling	N1	2	L2	800	18482	218	949	731	282	340	561	779	845	0.2297	0.77	0.32	3.353	0.7674	0.8577	0.7934	1.5641	25.2833	51.5281	0.0316	2.6458	0.6078	2.038	0.474	0.29	0.7703	0.2326	0.1791	0.6118	0.1096	218	50.078	167.922	39.0516	23.8904	949	218	731	170	104	0.378	3.353	0.303	0.384	1.5758
Filling	N1	2	L3	900	20419	248	1024	776	303	351	540	738	903	0.2422	0.758	0.5806	3.129	0.6314	0.8441	0.6186	1.2543	26.313	52.2681	0.0292	2.6212	0.6348	1.9864	0.7321	0.31	0.7578	0.3686	0.2793	0.4231	0.1182	248	60.0625	187.938	69.2656	29.3047	1024	248	776	286	121	0.3815	3.129	0.5837	0.697	0.7333
Filling	N1	2	L4	160	8095	268	825	557	302	333	452	635	716	0.3248	0.675	0.3622	2.078	0.6589	0.8043	0.5566	1.1011	14.5339	24.2891	0.0908	2.4753	0.8041	1.6712	0.5701	0.327	0.6752	0.3411	0.2303	0.5737	0.1321	268	87.0594	180.941	61.7212	35.4085	825	268	557	190	109	0.404	2.078	0.5177	0.435	1.3457
Filling	N1	3	L1	900	51302	327	1439	1112	359	392	517	753	1136	0.2272	0.773	2.372	3.401	0.3831	0.7275	0.2968	0.5695	46.1347	68.5884	0.0513	1.9239	0.4372	1.4867	0.9172	0.405	0.7728	0.6169	0.4767	0.4417	0.2106	327	74.3079	252.692	155.887	68.8541	1439	327	1112	686	303	0.5198	3.401	1.6103	2.846	0.7911
Filling	N1	3	L2	600	20483	235	1108	873	290	338	513	699	962	0.2121	0.788	1.0766	3.715	0.5315	0.8328	0.5498	1.0615	23.4631	46.8588	0.0391	2.5347	0.5376	1.9971	0.9357	0.334	0.7879	0.4685	0.3691	0.357	0.1318	235	49.8421	185.158	86.7464	30.9657	1108	235	873	409	146	0.3945	3.715	0.8815	1.292	0.5551
Filling	N1	3	L3	800	36426	338	1362	1024	382	426	559	750	1106	0.2482	0.752	1.5769	3.03	0.4023	0.75	0.4297	0.7194	35.572	63.6037	0.0445	2.3782	0.5902	1.788	1.0686	0.447	0.7518	0.5977	0.4493	0.4183	0.188	338	83.8796	254.12	151.877	63.5301	1362	338	1024	612	256	0.4205	3.03	1.4854	1.892	0.7191
Filling	N1	3	L4	700	17011	308	1028	720	337	361	473	681	835	0.2996	0.7	0.8608	2.338	0.5181	0.7319	0.3333	0.7639	23.6268	34.8384	0.0338	2.1053	0.6308	1.4745	0.7106	0.395	0.7004	0.4819	0.3375	0.5562	0.1877	308	92.2802	215.72	103.965	57.8249	1028	308	720	347	193	0.475	2.338	0.9303	1.033	1.2532
Filling	N1	4	L1	900	16419	257	1021	764	286	310	431	682	934	0.2517	0.748	1.0835	2.973	0.5563	0.8861	0.3141	0.7592	21.4903	29.3279	0.0239	1.8238	0.4591	1.3647	0.6055	0.155	0.7483	0.4437	0.332	0.2566	0.0852	257	64.6905	192.31	85.331	21.8991	1021	257	764	339	87	0.5483	2.973	0.7976	1.3	0.3452
Filling	N1	4	L2	800	15123	291	1309	1018	355	409	660	1044	1238	0.2223	0.778	0.4885	3.498	0.7397	0.9303	0.5305	1.2083	14.8558	24.2664	0.0186	2.1004	0.4669	1.6335	0.4252	0.114	0.7777	0.2603	0.2024	0.2679	0.0542	291	64.6914	226.309	58.9114	15.7838	1309	291	1018	265	71	0.4761	3.498	0.3519	0.586	0.366
Filling	N1	4	L3	600	7353	243	929	686	300	351	549	746	870	0.2616	0.738	0.3117	2.823	0.7332	0.914	0.7434	1.4869	10.7192	21.7368	0.0179	2.7461	0.7183	2.0278	0.541	0.174	0.7384	0.2668	0.197	0.3224	0.0635	243	63.5619	179.438	47.8676	15.4327	929	243	686	183	59	0.3641	2.823	0.3638	0.374	0.4758
Filling	N1	4	L4	600	11447	289	1113	824	339	383	583	907	1033	0.2597	0.74	0.3698	2.851	0.75	0.9029	0.534	1.1893	13.8922	22.0298	0.0232	2.1419	0.5562	1.5858	0.3964	0.154	0.7403	0.25	0.1851	0.3883	0.0719	289	75.0413	213.959	53.4897	20.7727	1113	289	824	206	80	0.4669	2.851	0.3333	0.444	0.6349
Filling	N2	1	L1	800	22559	228	959	731	260	283	410	648	803	0.2377	0.762	1.044	3.206	0.5746	0.7866	0.3146	0.8299	30.8599	44.5754	0.0386	1.895	0.4505	1.4444	0.6145	0.308	0.7623	0.4254	0.3243	0.5016	0.1627	228	54.2065	173.793	73.9395	37.0886	959	228	731	311	156	0.5277	3.206	0.7405	1.253	1.0065
Filling	N2	1	L2	800	23727	227	945	718	252	276	368	533	746	0.2402	0.76	1.7555	3.163	0.4262	0.7228	0.3343	0.6546	33.0464	50.7576	0.0413	2.0215	0.4856	1.5359	0.8814	0.426	0.7598	0.5738	0.436	0.483	0.2106	227	54.528	172.472	98.9672	47.8021	945	227	718	412	199	0.4947	3.163	1.3464	2.107	0.9343
Filling	N2	1	L3	280	15433	230	839	609	260	287	400	580	659	0.2741	0.726	0.732	2.648	0.5747	0.7044	0.4433	0.9305	25.3416	41.0293	0.0905	2.2305	0.6115	1.619	0.6886	0.479	0.7259	0.4253	0.3087	0.695	0.2145	230	63.0513	166.949	71.0012	49.3445	839	230	609	259	180	0.4483	2.648	0.74	0.878	2.2785
Filling	N2	1	L4	200	5531	229	492	263	244	259	316	405	417	0.4654	0.535	0.1535	1.148	0.6692	0.7148	0.5703	1.1027	21.0288	34.6497	0.1051	3.0824	1.4347	1.6477	0.5451	0.47	0.5346	0.3308	0.1768	0.8621	0.1524	229	106.587	122.413	40.4939	34.9085	492	229	263	87	75	0.3244	1.148	0.4943	0.184	6.25
Filling	N2	2	L1	900	22501	238	1040	802	283	325	474	657	927	0.2288	0.771	1.0543	3.37	0.5224	0.8591	0.5237	0.9809	28.0558	52.6743	0.0312	2.4346	0.5572	1.8775	0.8966	0.265	0.7712	0.4776	0.3683	0.295	0.1087	238	54.4654	183.535	87.6481	25.8596	1040	238	802	383	113	0.4107	3.37	0.9141	1.265	0.4185
Filling	N2	2	L2	900	14728	244	960	716	280	313	465	691	848	0.2542	0.746	0.666	2.934	0.6243	0.8436	0.4609	1.0289	20.5695	33.899	0.0229	2.2096	0.5616	1.648	0.6192	0.258	0.7458	0.3757	0.2802	0.4164	0.1167	244	62.0167	181.983	68.3708	28.4667	960	244	716	269	112	0.4526	2.934	0.6018	0.799	0.7134
Filling	N2	2	L3	200	7453	249	807	558	276	310	424	591	720	0.3086	0.691	0.4781	2.241	0.6129	0.8441	0.6093	1.0454	13.3558	22.7804	0.0668	2.4668	0.7611	1.7057	0.6603	0.266	0.6914	0.3871	0.2677	0.4028	0.1078	249	76.829	172.171	66.6468	26.8439	807	249	558	216	87	0.4054	2.241	0.6316	0.574	0.6744
Filling	N2	2	L4	500	9568	240	763	523	265	289	390	575	660	0.3145	0.685	0.468	2.179	0.6405	0.8031	0.4589	0.956	18.2947	27.3055	0.0366	2.1774	0.6849	1.4925	0.5365	0.294	0.6855	0.3595	0.2464	0.5479	0.135	240	75.4915	164.508	59.135	32.3984	763	240	523	188	103	0.4593	2.179	0.5612	0.562	1.2118
Filling	N2	3	L1	700	16224	249	998	749	286	316	446	612	884	0.2495	0.751	1.1058	3.008	0.4846	0.8478	0.4005	0.8767	21.6615	39.1857	0.0309	2.4104	0.6014	1.809	0.9323	0.275	0.7505	0.5154	0.3868	0.2953	0.1142	249	62.1253	186.875	96.3066	28.4429	998	249	749	386	114	0.4149	3.008	1.0634	1.327	0.4191
Filling	N2	3	L2	900	29959	278	1151	873	314	347	476	678	969	0.2415	0.758	1.4225	3.14	0.4582	0.7915	0.378	0.756	34.3174	56.6237	0.0381	2.1754	0.5254	1.65	0.894	0.344	0.7585	0.5418	0.4109	0.3848	0.1581	278	67.1451	210.855	114.243	43.9583	1151	278	873	473	182	0.4597	3.14	1.1825	1.707	0.6254
Filling	N2	3	L3	280	11415	283	836	553	311	339	444	603	689	0.3385	0.661	0.4677	1.954	0.5787	0.7342	0.5063	0.9705	20.6421	34.6185	0.0737	2.5353	0.8583	1.6771	0.7066	0.446	0.6615	0.4213	0.2787	0.6309	0.1758	283	95.8002	187.2	78.8744	49.762	836	283	553	233	147	0.3944	1.954	0.7281	0.561	1.7093
Filling	N2	3	L4	200	11889	289	863	574	320	346	456	639	699	0.3349	0.665	0.443	1.986	0.6098	0.7143	0.453	0.9698	20.7124	32.9426	0.1036	2.3913	0.8008	1.5905	0.6207	0.454	0.6651	0.3902	0.2596	0.7321	0.19	289	96.7798	192.22	75.0127	54.92	863	289	574	224	164	0.4182	1.986	0.64	0.532	2.7333
Filling	N2	4	L1	700	18975	250	1024	774	290	324	469	662	894	0.2441	0.756	0.967	3.096	0.5323	0.832	0.4393	0.9432	24.5156	43.4378	0.035	2.3441	0.5723	1.7718	0.8287	0.298	0.7559	0.4677	0.3535	0.3591	0.127	250	61.0352	188.965	88.3789	31.7383	1024	250	774	362	130	0.4266	3.096	0.8786	1.16	0.5603
Filling	N2	4	L2	900	15357	222	884	662	258	289	434	650	786	0.2511	0.749	0.6162	2.982	0.6465	0.852	0.4683	1.0675	23.2356	38.3641	0.0258	2.2048	0.5537	1.6511	0.5836	0.244	0.7489	0.3535	0.2647	0.4188	0.1109	222	55.7511	166.249	58.7647	24.6109	884	222	662	234	98	0.4536	2.982	0.5467	0.739	0.7206
Filling	N2	4	L3	700	16461	266	985	719	307	342	502	770	847	0.2701	0.73	0.4494	2.703	0.701	0.8081	0.4868	1.0941	22.9332	35.7952	0.0328	2.1383	0.5774	1.5608	0.4667	0.3	0.7299	0.299	0.2183	0.6419	0.1401	266	71.8335	194.167	58.0609	37.267	985	266	719	215	138	0.4677	2.703	0.4266	0.539	1.7922
Filling	N2	4	L4	250	7315	246	648	402	269	294	383	536	543	0.3796	0.62	0.2072	1.634	0.7214	0.7388	0.6219	1.136	18.234	28.7134	0.0729	2.5383	0.9636	1.5747	0.4387	0.411	0.6204	0.2786	0.1728	0.9375	0.162	246	93.3889	152.611	42.5185	39.8611	648	246	402	112	105	0.394	1.634	0.3862	0.249	15
[truncated: 14 more columns]
